# Supplementary material
Source: publisher figshare collection journal article supplement (https://gsapubs.figshare.com/ndownloader/files/39523207)
Supplement: Supplementary file 1 [file 39523207]

## Sheet: Repeated experiments
1100 R1 Heating				1100 R1 Cooling					1100 R2 Heating				1100 R1 Cooling					1100 R3 Heating				1100 R1 Cooling					1100 R4 Heating				1100 R1 Cooling
TEMP	CSUSC	1st deriv	knormed	TEMP	CSUSC	1st deriv	knormed		TEMP	CSUSC	1st deriv	knormed	TEMP	CSUSC	1st deriv	knormed		TEMP	CSUSC	1st deriv	knormed	TEMP	CSUSC	1st deriv	knormed		TEMP	CSUSC	1st deriv	knormed	TEMP	CSUSC	1st deriv	knormed
21.8	33.5	4	1	709.9	0.87	0.733333	0.025072		25.2	50.7	#DIV/0!	1	706	1.38	0.25	0.0272189		23.4	43.3	#DIV/0!	1	711.6	1.14	-1.17143	0.0263279		23.6	39.1	-1	1	710.9	3.7	18.1816	0.0946292
22.1	34.7	0.4	1.03582	709	0.21	-1.13846	0.00605187		25.2	50.3	0.615385	0.99211	705.4	1.23	0.161538	0.0242604		23.4	43	0.0769231	0.993072	710.9	1.96	1.39	0.0452656		23.9	38.8	0.230769	0.992327	710.3	2.81	18.1662	0.071867
23.6	35.3	-0.103448	1.05373	707.7	1.69	0.476471	0.0487032		26.5	51.1	-0.152174	1.00789	704.1	1.02	0.2375	0.0201183		24.7	43.1	-0.0434783	0.995381	709.9	0.57	-0.226316	0.013164		25.2	39.1	-0.0107143	1	709.3	4.02	18.1407	0.102813
26.5	35	0.0709677	1.04478	706	0.88	-0.9125	0.0253602		28.8	50.75	0.0709677	1.00099	702.5	0.64	-0.425	0.0126233		27	43	-0.1	0.993072	708	1	0.11	0.0230947		28	39.07	-0.0588235	0.999233	708	2.5	18.1074	0.0639386
29.6	35.22	-0.1	1.05134	704.4	2.34	-0.0363636	0.0674352		31.9	50.97	-0.164516	1.00533	700.5	1.49	-0.131818	0.0293886		29.8	42.72	0.1	0.986605	706	0.78	-0.286364	0.0180139		31.4	38.87	-0.127273	0.994118	706.7	2.22	18.0742	0.0567775
33.2	34.86	0.0387097	1.0406	702.2	2.42	0.484615	0.0697406		35	50.46	0.119355	0.995266	698.3	1.78	-0.169565	0.0351085		33.2	43.06	0.103226	0.994457	703.8	1.41	-0.234615	0.0325635		34.7	38.45	0.317647	0.983376	705.1	3.96	18.0332	0.101279
36.3	34.98	0.0545455	1.04418	699.6	1.16	-0.191304	0.0334294		38.1	50.83	-0.108824	1.00256	696	2.17	-0.151724	0.0428008		36.3	43.38	-0.0387097	1.00185	701.2	2.02	-0.108696	0.0466513		38.1	39.53	-0.138235	1.011	703.1	3.27	17.9821	0.0836317
39.6	35.16	-0.17931	1.04955	697.3	1.6	-0.173077	0.0461095		41.5	50.46	0.0451613	0.995266	693.1	2.61	0.331034	0.0514793		39.4	43.26	0.0580645	0.999076	698.9	2.27	0.37931	0.0524249		41.5	39.06	-0.0727273	0.998977	700.9	2.85	17.9258	0.07289
42.5	34.64	0.167742	1.03403	694.7	2.05	0.0681818	0.0590778		44.6	50.6	0.228571	0.998028	690.2	1.65	0.0206897	0.0325444		42.5	43.44	-0.0580645	1.00323	696	1.17	-0.442308	0.0270208		44.8	38.82	0.241935	0.992839	698.3	3.48	17.8593	0.0890026
45.6	35.16	-0.289655	1.04955	692.5	1.9	-0.108696	0.054755		47.4	51.24	-0.135484	1.01065	687.3	1.59	-0.015625	0.0313609		45.6	43.26	-0.0129032	0.999076	693.4	2.32	-0.009375	0.0535797		47.9	39.57	-0.12069	1.01202	695.7	3.79	17.7928	0.0969309
48.5	34.32	0.269231	1.02448	690.2	2.15	0.176	0.0619597		50.5	50.82	0.148276	1.00237	684.1	1.64	0.113793	0.0323471		48.7	43.22	0	0.998152	690.2	2.35	0.365625	0.0542725		50.8	39.22	-0.142308	1.00307	693.1	3.91	17.7263	0.1
51.1	35.02	-0.180769	1.04537	687.7	1.71	0.00689655	0.0492795		53.4	51.25	0.123077	1.01085	681.2	1.31	-0.292	0.0258383		51.3	43.22	0.0923077	0.998152	687	1.18	0.0514286	0.0272517		53.4	38.85	0.161538	0.993606	690.5	3.86	17.6598	0.0987212
53.7	34.55	0.276923	1.03134	684.8	1.69	0.131034	0.0487032		56	51.57	-0.134615	1.01716	678.7	2.04	0.451724	0.0402367		53.9	43.46	-0.0346154	1.0037	683.5	1	-0.0413793	0.0230947		56	39.27	0.0961538	1.00435	687.7	4.11	17.5882	0.105115
56.3	35.27	-0.152174	1.05284	681.9	1.31	0.084375	0.0377522		58.6	51.22	-0.0461538	1.01026	675.8	0.73	-0.025	0.0143984		56.5	43.37	0.0653846	1.00162	680.6	1.12	0.180769	0.0258661		58.6	39.52	-0.269565	1.01074	684.8	3.79	17.5141	0.0969309
58.6	34.92	-0.182609	1.04239	678.7	1.04	0.1625	0.0299712		61.2	51.1	0.173913	1.00789	672.6	0.81	-0.0314286	0.0159763		59.1	43.54	-0.270833	1.00554	678	0.65	-0.224138	0.0150115		60.9	38.9	0.230769	0.994885	681.9	3.11	17.4399	0.0795396
60.9	34.5	0.115385	1.02985	675.5	0.52	-0.168966	0.0149856		63.5	51.5	-0.291667	1.01578	669.1	0.92	0.186207	0.018146		61.5	42.89	0.356522	0.990531	675.1	1.3	-0.0714286	0.0300231		63.5	39.5	-0.0833333	1.01023	679	2.88	17.3657	0.0736573
63.5	34.8	-0.138095	1.03881	672.6	1.01	-0.375862	0.0291066		65.9	50.8	0.315385	1.00197	666.2	0.38	-0.33125	0.00749507		63.8	43.71	-0.05	1.00947	672.3	1.5	-0.037931	0.034642		65.9	39.3	0.00869565	1.00512	675.8	2.83	17.2839	0.0723785
65.6	34.51	0.254167	1.03015	669.7	2.1	0.444828	0.0605187		68.5	51.62	-0.0714286	1.01815	663	1.44	0.393103	0.0284024		66.2	43.59	0.0565217	1.0067	669.4	1.61	0.386207	0.0371824		68.2	39.32	0.0625	1.00563	673.2	3.22	17.2174	0.0823529
68	35.12	-0.0173913	1.04836	666.8	0.81	-0.00625	0.0233429		70.6	51.47	0.3	1.01519	660.1	0.3	-0.407143	0.00591716		68.5	43.72	-0.1875	1.0097	666.5	0.49	-0.265625	0.0113164		70.6	39.47	-0.147619	1.00946	670	2.68	17.1355	0.0685422
70.3	35.08	0.133333	1.04716	663.6	0.83	-0.0870968	0.0239193		72.9	52.16	-0.0190476	1.0288	657.3	1.44	0.0538462	0.0284024		70.9	43.27	0.165217	0.999307	663.3	1.34	0.442857	0.0309469		72.7	39.16	-0.0173913	1.00153	667.2	3.73	17.0639	0.0953964
72.4	35.36	-0.438095	1.05552	660.5	1.1	0.268966	0.0317003		75	52.12	-0.452381	1.02801	654.7	1.3	-0.0107143	0.025641		73.2	43.65	-0.0458333	1.00808	660.5	0.1	-0.110345	0.00230947		75	39.12	0.108333	1.00051	664	1.93	16.9821	0.0493606
74.5	34.44	0.295238	1.02806	657.6	0.32	-0.303448	0.0092219		77.1	51.17	-0.342857	1.00927	651.9	1.33	-0.146875	0.0262327		75.6	43.54	0.0130435	1.00554	657.6	0.42	-0.475	0.00969977		77.4	39.38	-0.208333	1.00716	660.8	3.09	16.9003	0.0790281
76.6	35.06	-0.047619	1.04657	654.7	1.2	0.382143	0.0345821		79.2	50.45	0.3125	0.995069	648.7	1.8	-0.00625	0.035503		77.9	43.57	-0.254167	1.00624	654.4	1.94	0.453125	0.0448037		79.8	38.88	-0.026087	0.994373	657.6	3.22	16.8184	0.0823529
78.7	34.96	-0.1	1.04358	651.9	0.13	-0.537931	0.0037464		81.6	51.2	-0.00952381	1.00986	645.5	1.82	-0.0823529	0.0358974		80.3	42.96	0.23913	0.992148	651.2	0.49	-0.15	0.0113164		82.1	38.82	0.166667	0.992839	654.4	2.64	16.7366	0.0675192
81.1	34.72	0.0333333	1.03642	649	1.69	0.048	0.0487032		83.7	51.18	0.191667	1.00947	642.1	2.1	0.305714	0.0414201		82.6	43.51	0.1875	1.00485	648.4	0.91	-0.037931	0.0210162		84.5	39.22	0.165217	1.00307	651.6	2.71	16.665	0.0693095
83.2	34.79	0.185714	1.03851	646.5	1.57	0.096875	0.045245		86.1	51.64	-0.16087	1.01854	638.6	1.03	-0.084375	0.0203156		85	43.96	0.0208333	1.01524	645.5	1.02	-0.0225806	0.0235566		86.8	39.6	-0.0592593	1.01279	648.7	2.4	16.5908	0.0613811
85.3	35.18	-0.208696	1.05015	643.3	1.26	-0.258065	0.0363112		88.4	51.27	0.116667	1.01124	635.4	1.3	0.0794118	0.025641		87.4	44.01	-0.108696	1.0164	642.4	1.09	-0.1	0.0251732		89.5	39.44	0.256522	1.0087	645.9	4.1	16.5192	0.104859
87.6	34.7	0.116667	1.03582	640.2	2.06	0.221875	0.059366		90.8	51.55	-0.0916667	1.01677	632	1.03	-0.322857	0.0203156		89.7	43.76	0.183333	1.01062	639.5	1.38	0.309677	0.0318707		91.8	40.03	-0.211111	1.02379	642.7	3.68	16.4373	0.0941176
90	34.98	-0.133333	1.04418	637	1.35	0.325806	0.0389049		93.2	51.33	0.169231	1.01243	628.5	2.16	0.148571	0.0426036		92.1	44.2	0.025	1.02079	636.4	0.42	-0.48125	0.00969977		94.5	39.46	0.0869565	1.00921	639.5	3.38	16.3555	0.086445
92.1	34.7	0.108333	1.03582	633.9	0.34	-0.21875	0.00979827		95.8	51.77	-0.2375	1.0211	625	1.64	-0.164865	0.0323471		94.5	44.26	-0.0434783	1.02217	633.2	1.96	0.358065	0.0452656		96.8	39.66	0	1.01432	636.4	3.82	16.2762	0.0976982
94.5	34.96	-0.0869565	1.04358	630.7	1.04	-0.468571	0.0299712		98.2	51.2	0.395652	1.00986	621.3	2.25	-0.0971429	0.0443787		96.8	44.16	-0.0416667	1.01986	630.1	0.85	-0.44	0.0196305		99.2	39.66	-0.075	1.01432	633.2	2.56	16.1944	0.0654731
96.8	34.76	0.166667	1.03761	627.2	2.68	0.143243	0.0772334		100.5	52.11	-0.0708333	1.02781	617.8	2.59	0.118919	0.0510848		99.2	44.06	-0.0333333	1.01755	626.6	2.39	0.605882	0.0551963		101.6	39.48	-0.128571	1.00972	630.4	3.64	16.1228	0.0930946
99.2	35.16	0.133333	1.04955	623.5	2.15	0.331579	0.0619597		102.9	51.94	0.0538462	1.02446	614.1	2.15	0.271429	0.0424063		101.6	43.98	0.00833333	1.0157	623.2	0.33	-0.359375	0.00762125		103.7	39.21	-0.0416667	1.00281	626.9	3.98	16.0332	0.10179
101.6	35.48	-0.257692	1.0591	619.7	0.89	-0.271053	0.0256484		105.5	52.08	-0.0458333	1.02722	610.6	1.2	-0.183871	0.0236686		104	44	0.0807692	1.01617	620	1.48	-0.138235	0.0341801		106.1	39.11	0.491667	1.00026	623.5	3.35	15.9463	0.0856777
104.2	34.81	0.0416667	1.0391	615.9	1.92	0.167568	0.0553314		107.9	51.97	0.296296	1.02505	607.5	1.77	0.0428571	0.0349112		106.6	44.21	-0.00769231	1.02102	616.6	1.95	0.1875	0.0450346		108.5	40.29	-0.265385	1.03043	620	4.18	15.8568	0.106905
106.6	34.91	0.195833	1.04209	612.2	1.3	-0.379412	0.037464		110.6	52.77	0.0130435	1.04083	604.7	1.65	-0.213514	0.0325444		109.2	44.19	-0.0708333	1.02055	613.4	1.35	-0.00967742	0.0311778		111.1	39.6	0.204167	1.01279	616.9	3.66	15.7775	0.0936061
109	35.38	0.0583333	1.05612	608.8	2.59	0.408571	0.0746398		112.9	52.8	-0.425926	1.04142	601	2.44	-0.0105263	0.0481262		111.6	44.02	0.244444	1.01663	610.3	1.38	0.36129	0.0318707		113.5	40.09	0.0230769	1.02532	614.1	3.95	15.7059	0.101023
111.4	35.52	0.0230769	1.0603	605.3	1.16	-0.0810811	0.0334294		115.6	51.65	0.15	1.01874	597.2	2.48	-0.120588	0.0489152		114.3	44.68	-0.120833	1.03187	607.2	0.26	-0.158824	0.00600462		116.1	40.15	-0.129167	1.02685	610.9	3.52	15.624	0.0900256
114	35.58	-0.158333	1.06209	601.6	1.46	0.190323	0.0420749		118.2	52.04	-0.0166667	1.02643	593.8	2.89	-1.08235	0.057002		116.7	44.39	0.157692	1.02517	603.8	0.8	0.0763158	0.0184758		118.5	39.84	-0.141667	1.01893	607.5	2.97	15.5371	0.0759591
116.4	35.2	0.0384615	1.05075	598.5	0.87	-0.32	0.025072		120.6	52	0.0481481	1.02564	590.4	6.57	-0.883871	0.129586		119.3	44.8	-0.0875	1.03464	600	0.51	-0.197297	0.0117783		120.9	39.5	0.179167	1.01023	604.1	2.52	15.4501	0.0644501
119	35.3	-0.291667	1.05373	595	1.99	-0.55	0.0573487		123.3	52.13	-0.0375	1.02821	587.3	9.31	-1.82353	0.183629		121.7	44.59	-0.0125	1.02979	596.3	1.24	-0.454054	0.0286374		123.3	39.93	-0.269231	1.02123	601	3.34	15.3708	0.085422
121.4	34.6	0.295833	1.03284	591.6	3.86	-0.823529	0.111239		125.7	52.04	-0.1	1.02643	583.9	15.51	-3.00294	0.305917		124.1	44.56	-0.169231	1.0291	592.6	2.92	-0.757143	0.0674365		125.9	39.23	0.108333	1.00332	597.5	3.09	15.2813	0.0790281
123.8	35.31	0.175	1.05403	588.2	6.66	-1.25161	0.191931		128.1	51.8	0.0692308	1.0217	580.5	25.72	-3.44412	0.507298		126.7	44.12	0.225	1.01894	589.1	5.57	-0.864706	0.128637		128.3	39.49	0.37037	1.00997	594.4	3.62	15.202	0.0925831
126.2	35.73	-0.277778	1.06657	585.1	10.54	-2.23226	0.303746		130.7	51.98	0.1125	1.02525	577.1	37.43	-3.04412	0.738264		129.1	44.66	0.35	1.03141	585.7	8.51	-1.92143	0.196536		131	40.49	-0.196296	1.03555	591	4.86	15.1151	0.124297
128.9	34.98	0.0458333	1.04418	582	17.46	-3.39355	0.50317		133.1	52.25	-0.0444444	1.03057	573.7	47.78	-1.64706	0.942406		131.5	45.5	-0.196296	1.05081	582.9	13.89	-2.43667	0.320785		133.7	39.96	-0.0153846	1.02199	587.6	8.1	15.0281	0.207161
131.3	35.09	-0.0142857	1.04746	578.9	27.98	-4.05	0.80634		135.8	52.13	-0.225	1.02821	570.3	53.38	-0.447059	1.05286		134.2	44.97	0.183333	1.03857	579.9	21.2	-3.08214	0.489607		136.3	39.92	-0.0958333	1.02097	584.5	12.13	14.9488	0.31023
133.4	35.06	-0.0148148	1.04657	576.1	39.32	-4.29333	1.13314		138.2	51.59	0.282759	1.01755	566.9	54.9	-0.294118	1.08284		136.6	45.41	-0.411111	1.04873	577.1	29.83	-3.01613	0.688915		138.7	39.69	0.344444	1.01509	581.4	17.75	14.8696	0.453964
136.1	35.02	-0.0125	1.04537	573.1	52.2	-1.76176	1.50432		141.1	52.41	0.175	1.03373	563.5	55.9	0.241176	1.10256		139.3	44.3	-0.0615385	1.02309	574	39.18	-1.41935	0.90485		141.4	40.62	-0.4125	1.03887	578	27.25	14.7826	0.696931
138.5	34.99	0.341667	1.04448	569.7	58.19	0	1.67695		143.5	52.83	-0.17037	1.04201	560.1	55.08	0.227273	1.08639		141.9	44.14	0.577778	1.0194	570.9	43.58	-0.751613	1.00647		143.8	39.63	-0.0592593	1.01355	574.6	36.16	14.6957	0.924808
140.9	35.81	-0.184615	1.06896	566.3	58.19	-0.302941	1.67695		146.2	52.37	0.296296	1.03294	556.8	54.33	-0.287097	1.0716		144.6	45.7	-0.166667	1.05543	567.8	45.91	-0.105882	1.06028		146.5	39.47	0.262963	1.00946	571.5	41.27	14.6164	1.0555
143.5	35.33	0.0148148	1.05463	562.9	59.22	0.335294	1.70663		148.9	53.17	0.0259259	1.04872	553.7	55.22	0.344118	1.08915		147	45.3	0.0888889	1.04619	564.4	46.27	0.156667	1.06859		149.2	40.18	0.142308	1.02762	568.1	43.51	14.5294	1.11279
146.2	35.37	0.111111	1.05582	559.5	58.08	-0.0833333	1.67378		151.6	53.24	-0.153846	1.0501	550.3	54.05	-0.406667	1.06607		149.7	45.54	-0.0333333	1.05173	561.4	45.8	-0.083871	1.05774		151.8	40.55	-0.2125	1.03708	565.1	43.15	14.4527	1.10358
148.9	35.67	0.1	1.06478	556.5	58.33	0.191892	1.68098		154.2	52.84	-0.0481481	1.04221	547.3	55.27	0.226471	1.09014		152.1	45.46	-0.22963	1.04988	558.3	46.06	0.00645161	1.06374		154.2	40.04	0.211111	1.02404	561.4	43.5	14.3581	1.11253
151.6	35.94	-0.208333	1.07284	552.8	57.62	-0.0354839	1.66052		156.9	52.71	0.0333333	1.03964	543.9	54.5	0.266667	1.07495		154.8	44.84	0.0962963	1.03557	555.2	46.04	-0.140741	1.06328		156.9	40.61	-0.103333	1.03862	558	42.72	14.2711	1.09258
154	35.44	0.0241379	1.05791	549.7	57.73	-0.0484848	1.66369		159.3	52.79	-0.137037	1.04122	540.9	53.7	-0.0243243	1.05917		157.5	45.1	-0.251724	1.04157	552.5	46.42	0.211765	1.07206		159.9	40.3	0.0407407	1.03069	554.6	42.52	14.1841	1.08747
156.9	35.51	-0.00333333	1.06	546.4	57.89	0.0794118	1.6683		162	52.42	0.336667	1.03393	537.2	53.79	0.0181818	1.06095		160.4	44.37	0.38	1.02471	549.1	45.7	0.0666667	1.05543		162.6	40.41	-0.0862069	1.0335	551.6	43.72	14.1074	1.11816
159.9	35.5	0.114815	1.0597	543	57.62	0.106667	1.66052		165	53.43	-0.240741	1.05385	533.9	53.73	-0.170968	1.05976		163.4	45.51	-0.324138	1.05104	546.1	45.5	-0.00588235	1.05081		165.5	40.16	0.09	1.02711	548.5	43.08	14.0281	1.10179
162.6	35.81	-0.148148	1.06896	540	57.3	-0.00294118	1.6513		167.7	52.78	0.0655172	1.04103	530.8	54.26	0.25	1.07022		166.3	44.57	0.507407	1.02933	542.7	45.52	0.0352941	1.05127		168.5	40.43	-0.0148148	1.03402	545.1	43.12	13.9412	1.10281
165.3	35.41	0.0777778	1.05701	536.6	57.31	-0.173333	1.65159		170.6	52.97	0.0814815	1.04477	527.8	53.51	0.116667	1.05542		169	45.94	-0.363333	1.06097	539.3	45.4	-0.278788	1.0485		171.2	40.39	-0.144444	1.03299	541.8	43.33	13.8568	1.10818
168	35.62	-0.0413793	1.06328	533.6	57.83	0.345946	1.66657		173.3	53.19	0.00333333	1.04911	524.8	53.16	0.0941176	1.04852		172	44.85	0.0555556	1.0358	536	46.32	0.226667	1.06975		173.9	40	0.28	1.02302	538.4	42.8	13.7698	1.09463
170.9	35.5	0.148148	1.0597	529.9	56.55	-0.427273	1.62968		176.3	53.2	-0.106667	1.04931	521.4	52.84	-0.224242	1.04221		174.7	45	0.116667	1.03926	533	45.64	0.205882	1.05404		176.9	40.84	-0.155556	1.0445	534.8	42.45	13.6777	1.08568
173.6	35.9	-0.111111	1.07164	526.6	57.96	0.523529	1.67032		179.3	52.88	0.554167	1.043	518.1	53.58	0.356667	1.0568		177.7	45.35	-0.125926	1.04734	529.6	44.94	-0.278788	1.03788		179.6	40.42	-0.0444444	1.03376	531.7	43.15	13.5985	1.10358
176.3	35.6	-0.122222	1.06269	523.2	56.18	-0.01	1.61902		181.7	54.21	-0.366667	1.06923	515.1	52.51	-0.0307692	1.0357		180.4	45.01	0.274074	1.03949	526.3	45.86	0.173529	1.05912		182.3	40.3	0.193103	1.03069	529	42.03	13.5294	1.07494
179	35.27	0.274074	1.05284	520.2	56.21	-0.156667	1.61988		184.7	53.11	0.037037	1.04753	511.2	52.63	-0.0324324	1.03807		183.1	45.75	-0.186207	1.05658	522.9	45.27	-0.0366667	1.0455		185.2	40.86	-0.22	1.04501	526.6	43.46	13.468	1.11151
181.7	36.01	-0.255556	1.07493	517.2	56.68	-0.01	1.63343		187.4	53.21	0.340741	1.04951	507.5	52.75	-0.336111	1.04043		186	45.21	0.2	1.04411	519.9	45.38	0.418182	1.04804		188.2	40.2	0.22963	1.02813	524.2	43.66	13.4066	1.11662
184.4	35.32	0.322222	1.05433	514.2	56.71	-0.127273	1.63429		190.1	54.13	-0.136667	1.06765	503.9	53.96	0.445455	1.0643		189	45.81	-0.113333	1.05797	516.6	44	-0.0666667	1.01617		190.9	40.82	-0.0444444	1.04399	521.7	43.34	13.3427	1.10844
187.1	36.19	-0.174074	1.0803	510.9	57.13	0.0529412	1.6464		193.1	53.72	0.062963	1.05957	500.6	52.49	-0.323333	1.03531		192	45.47	0.273333	1.05012	513.3	44.22	-0.329412	1.02125		193.6	40.7	0.135714	1.04092	519	44.18	13.2737	1.12992
189.8	35.72	0.0266667	1.06627	507.5	56.95	0.272727	1.64121		195.8	53.89	0.00333333	1.06292	497.6	53.46	-0.0727273	1.05444		195	46.29	0.07	1.06905	509.9	45.34	0.213889	1.04711		196.4	41.08	-0.0296296	1.05064	516.6	42.4	13.2123	1.0844
192.8	35.8	-0.0777778	1.06866	504.2	56.05	-0.0424242	1.61527		198.8	53.9	-0.0148148	1.06312	494.3	53.7	0.379487	1.05917		198	46.5	0.16	1.0739	506.3	44.57	0.0454545	1.02933		199.1	41	0.0185185	1.04859	513.6	43.32	13.1355	1.10793
195.5	35.59	0.236667	1.06239	500.9	56.19	-0.20303	1.61931		201.5	53.86	-0.216667	1.06233	490.4	52.22	-0.125	1.02998		201	46.98	-0.283333	1.08499	503	44.42	-0.269697	1.02587		201.8	41.05	0.0222222	1.04987	510.6	43.24	13.0588	1.10588
198.5	36.3	-0.117857	1.08358	497.6	56.86	0.286667	1.63862		204.5	53.21	0.0962963	1.04951	486.8	52.67	0.169697	1.03886		204	46.13	-0.0166667	1.06536	499.7	45.31	0.115152	1.04642		204.5	41.11	-0.05	1.05141	507.5	43.45	12.9795	1.11125
201.3	35.97	0.0517241	1.07373	494.6	56	0.0757576	1.61383		207.2	53.47	0.139286	1.05464	483.5	52.11	0.0236842	1.02781		207	46.08	0.06	1.0642	496.4	44.93	0.154545	1.03764		207.5	40.96	0.07	1.04757	504.2	42.75	12.8951	1.09335
204.2	36.12	-0.121429	1.07821	491.3	55.75	-0.19697	1.60663		210	53.86	0.133333	1.06233	479.7	52.02	0.211111	1.02604		210	46.26	0.02	1.06836	493.1	44.42	-0.00606061	1.02587		210.5	41.17	-0.192857	1.05294	501.2	43.89	12.8184	1.12251
207	35.78	0.062963	1.06806	488	56.4	0.17	1.62536		212.7	54.22	-0.123333	1.06943	476.1	51.26	-0.121212	1.01105		213	46.32	0.176667	1.06975	489.8	44.44	0.142424	1.02633		213.3	40.63	0.206667	1.03913	498.2	42.94	12.7417	1.09821
209.7	35.95	-0.2	1.07313	485	55.89	0.430303	1.61066		215.7	53.85	0.111111	1.06213	472.8	51.66	0.148485	1.01893		216	46.85	0.0407407	1.08199	486.5	43.97	-0.163636	1.01547		216.3	41.25	0.155556	1.05499	495.2	42.81	12.665	1.09488
212.4	35.41	0.332143	1.05701	481.7	54.47	0.210345	1.56974		218.4	54.15	0.00322581	1.06805	469.5	51.17	0.0685714	1.00927		218.7	46.96	-0.392857	1.08453	483.2	44.51	0.175	1.02794		219	41.67	-0.106667	1.06573	491.9	42.68	12.5806	1.09156
215.2	36.34	-0.151852	1.08478	478.8	53.86	-0.333333	1.55216		221.5	54.16	0.0481481	1.06824	466	50.93	0.0194444	1.00454		221.5	45.86	0.159259	1.05912	480	43.95	-0.147222	1.01501		222	41.35	0.0481481	1.05754	488.9	43.12	12.5038	1.10281
217.9	35.93	0.17037	1.07254	475.5	54.96	-0.233333	1.58386		224.2	54.29	0.162963	1.07081	462.4	50.86	-0.116667	1.00316		224.2	46.29	0.311111	1.06905	476.4	44.48	0.339394	1.02725		224.7	41.48	-0.0892857	1.06087	485.6	41.99	12.4194	1.07391
220.6	36.39	0.04	1.08627	472.2	55.73	0.0888889	1.60605		226.9	54.73	-0.635484	1.07949	458.2	51.35	0.18	1.01282		226.9	47.13	-0.375	1.08845	473.1	43.36	-0.280556	1.00139		227.5	41.23	-0.0666667	1.05448	482.3	42.02	12.335	1.07468
223.1	36.49	-0.125926	1.08925	468.6	55.41	0.18125	1.59683		230	52.76	0.533333	1.04063	454.7	50.72	-0.138889	1.00039		229.7	46.08	0.204	1.0642	469.5	44.37	0.134375	1.02471		230.5	41.03	-0.103333	1.04936	479.4	42.56	12.2609	1.08849
225.8	36.15	-0.285714	1.0791	465.4	54.83	0.0212121	1.58012		232.7	54.2	0.0714286	1.06903	451.1	51.22	0.02	1.01026		232.2	46.59	0.0333333	1.07598	466.3	43.94	0.00833333	1.01478		233.5	40.72	0.217857	1.04143	476.4	42.18	12.1841	1.07877
228.6	35.35	0.14	1.05522	462.1	54.76	-0.115152	1.5781		235.5	54.4	0	1.07298	447.6	51.15	-0.194286	1.00888		234.9	46.68	0.0321429	1.07806	462.7	43.91	-0.108333	1.01409		236.3	41.33	0.032	1.05703	473.1	42.66	12.0997	1.09105
231.6	35.77	-0.244	1.06776	458.8	55.14	0.34375	1.58905		238.5	54.4	0.0766667	1.07298	444.1	51.83	0.384848	1.02229		237.7	46.77	-0.159259	1.08014	459.1	44.3	0.153125	1.02309		238.8	41.41	0.00740741	1.05908	469.8	42.17	12.0153	1.07852
234.1	35.16	0.437037	1.04955	455.6	54.04	-0.366667	1.55735		241.5	54.63	0.0928571	1.07751	440.8	50.56	-0.02	0.997239		240.4	46.34	0.314286	1.07021	455.9	43.81	0.0722222	1.01178		241.5	41.43	-0.05	1.05959	466.6	42.25	11.9335	1.08056
236.8	36.34	0.0321429	1.08478	452.3	55.25	0.3125	1.59222		244.3	54.89	0.1	1.08264	437.3	50.63	0.203448	0.998619		243.2	47.22	-0.22	1.09053	452.3	43.55	-0.15625	1.00577		244.3	41.29	-0.0851852	1.05601	463.3	42.69	11.8491	1.09182
239.6	36.43	-0.0740741	1.08746	449.1	54.25	-0.175	1.5634		247	55.16	-0.107143	1.08797	434.4	50.04	-0.312121	0.986982		246.2	46.56	0.178571	1.07529	449.1	44.05	0.0472222	1.01732		247	41.06	-0.232258	1.05013	460	41.69	11.7647	1.06624
242.3	36.23	0.16129	1.08149	445.5	54.88	-0.221875	1.58156		249.8	54.86	-0.28	1.08205	431.1	51.07	0.178125	1.0073		249	47.06	-0.0111111	1.08684	445.5	43.88	-0.00285714	1.01339		250.1	40.34	0.66	1.03171	456.5	43.6	11.6752	1.11509
245.4	36.73	-0.137037	1.09642	442.3	55.59	0.0942857	1.60202		252.8	54.02	0.207143	1.06548	427.9	50.5	0.05625	0.996055		251.7	47.03	-0.178571	1.08614	442	43.89	0.228125	1.01363		253.1	42.32	-0.0107143	1.08235	452.6	42.26	11.5754	1.08082
248.1	36.36	0.232	1.08537	438.8	55.26	0.327273	1.59251		255.6	54.6	0.180645	1.07692	424.7	50.32	-0.103125	0.992505		254.5	46.53	0.339286	1.0746	438.8	43.16	0.0242424	0.996767		255.9	42.29	-0.225	1.08159	449.1	41.75	11.4859	1.06777
250.6	36.94	-0.0612903	1.10269	435.5	54.18	-0.15625	1.56138		258.7	55.16	-0.107407	1.08797	421.5	50.65	0.193939	0.999014		257.3	47.48	0.0888889	1.09654	435.5	43.08	-0.0542857	0.994919		258.7	41.66	-0.0212121	1.06547	445.5	42.38	11.3939	1.08389
253.7	36.75	-0.42	1.09701	432.3	54.68	0.0485714	1.57579		261.4	54.87	0.16129	1.08225	418.2	50.01	-0.0371429	0.986391		260	47.72	0.13871	1.10208	432	43.27	0.0517241	0.999307		262	41.59	0.27	1.06368	442.6	41.5	11.3197	1.06138
256.7	35.49	0.217857	1.0594	428.8	54.51	-0.15625	1.57089		264.5	55.37	0.153333	1.09211	414.7	50.14	0.228571	0.988955		263.1	48.15	-0.175758	1.11201	429.1	43.12	0.0885714	0.995843		265	42.4	-0.129032	1.0844	439.1	41.16	11.2302	1.05269
259.5	36.1	0.166667	1.07761	425.6	55.01	0.122222	1.5853		267.5	55.83	-0.321429	1.10118	411.2	49.34	-0.184375	0.973176		266.4	47.57	0.154839	1.09861	425.6	42.81	0.10303	0.988684		268.1	42	-0.0516129	1.07417	435.8	42.19	11.1458	1.07903
262.8	36.65	-0.00714286	1.09403	422	54.57	-0.034375	1.57262		270.3	54.93	0.0774194	1.08343	408	49.93	-0.21875	0.984813		269.5	48.05	-0.0633333	1.1097	422.3	42.47	-0.125	0.980831		271.2	41.84	-0.0363636	1.07008	432.3	42.08	11.0563	1.07621
265.6	36.63	0.0833333	1.09343	418.8	54.68	0.23125	1.57579		273.4	55.17	0.121429	1.08817	404.8	50.63	0.365517	0.998619		272.5	47.86	-0.0483871	1.10531	419.1	42.87	0.208571	0.990069		274.5	41.72	0.0645161	1.06701	428.5	42.41	10.9591	1.08465
268.6	36.88	-0.05	1.1009	415.6	53.94	0.0657143	1.55447		276.2	55.51	-0.0833333	1.09487	401.9	49.57	-0.371875	0.977712		275.6	47.71	-0.185714	1.10185	415.6	42.14	-0.0771429	0.97321		277.6	41.92	-0.0166667	1.07212	425	41.52	10.8696	1.06189
271.4	36.74	0.122581	1.09672	412.1	53.71	-0.071875	1.54784		279.2	55.26	0.05	1.08994	398.7	50.76	0.179412	1.00118		278.4	47.19	0.170968	1.08984	412.1	42.41	-0.134375	0.979446		280.6	41.87	0.00967742	1.07084	421.5	41.75	10.7801	1.06777
274.5	37.12	0.0642857	1.10806	408.9	53.94	-0.171875	1.55447		282	55.4	0.25	1.0927	395.3	50.15	-0.1	0.989152		281.5	47.72	-0.43	1.10208	408.9	42.84	0.109375	0.989376		283.7	41.9	-0.0352941	1.07161	418	42.33	10.6905	1.08261
277.3	37.3	-0.433333	1.11343	405.7	54.49	0.259375	1.57032		285.4	56.25	-0.270968	1.10947	392.4	50.44	0.38125	0.994872		284.5	46.43	0.285294	1.07229	405.7	42.49	0.0137931	0.981293		287.1	41.78	0.0533333	1.06854	414.7	41.34	10.6061	1.05729
280.6	35.87	0.46129	1.07075	402.5	53.66	-0.290625	1.5464		288.5	55.41	-0.203333	1.0929	389.2	49.22	-0.534375	0.970809		287.9	47.4	-0.114706	1.09469	402.8	42.45	0.0742857	0.98037		290.1	41.94	-0.109677	1.07263	411.2	41.54	10.5166	1.0624
283.7	37.3	-0.0941176	1.11343	399.3	54.59	-0.0142857	1.5732		291.5	54.8	0.264516	1.08087	386	50.93	0.278125	1.00454		291.3	47.01	0.0861111	1.08568	399.3	42.19	-0.259375	0.974365		293.2	41.6	0.167742	1.06394	407.7	41.14	10.4271	1.05217
287.1	36.98	0.02	1.10388	395.8	54.64	-0.147059	1.57464		294.6	55.62	0.1	1.09704	382.8	50.04	0.124138	0.986982		294.9	47.32	-0.0805556	1.09284	396.1	43.02	0.194286	0.993533		296.3	42.12	0.270588	1.07724	404.5	41.75	10.3453	1.06777
290.1	37.04	-0.0774194	1.10567	392.4	55.14	0.157143	1.58905		297.7	55.93	-0.219355	1.10316	379.9	49.68	-0.0647059	0.979882		298.5	47.03	-0.0529412	1.08614	392.6	42.34	0.0645161	0.977829		299.7	43.04	-0.175758	1.10077	401.1	41.81	10.2583	1.06931
293.2	36.8	0.152941	1.09851	388.9	54.59	-0.157143	1.5732		300.8	55.25	0.303226	1.08974	376.5	49.9	-0.08125	0.984221		301.9	46.85	-0.00294118	1.08199	389.5	42.14	0.00625	0.97321		303	42.46	-0.182353	1.08593	397.9	42.11	10.1765	1.07698
296.6	37.32	-0.206061	1.11403	385.4	55.14	0.34	1.58905		303.9	56.19	-0.0235294	1.10828	373.3	50.16	0.21875	0.989349		305.3	46.84	0.15	1.08176	386.3	42.12	-0.0605263	0.972748		306.4	41.84	0.109677	1.07008	394.4	41.57	10.087	1.06317
299.9	36.64	0.0970588	1.09373	381.9	53.95	-0.241935	1.55476		307.3	56.11	-0.232258	1.10671	370.1	49.46	-0.0903226	0.975542		308.7	47.35	-0.129412	1.09353	382.5	42.35	0.1625	0.97806		309.5	42.18	-0.0516129	1.07877	390.9	43.34	9.99744	1.10844
303.3	36.97	-0.00967742	1.10358	378.8	54.7	-0.03125	1.57637		310.4	55.39	0.167742	1.0925	367	49.74	0.114286	0.981065		312.1	46.91	-0.0424242	1.08337	379.3	41.83	0.189286	0.966051		312.6	42.02	0.0117647	1.07468	387.1	42.05	9.90026	1.07545
306.4	36.94	-0.182143	1.10269	375.6	54.8	0.046875	1.57925		313.5	55.91	-0.272727	1.10276	363.5	49.34	-0.193548	0.973176		315.4	46.77	-0.374194	1.08014	376.5	41.3	-0.08125	0.953811		316	42.06	-0.154839	1.0757	383.7	42.47	9.8133	1.08619
309.2	36.43	0.0935484	1.08746	372.4	54.65	0.2	1.57493		316.8	55.01	-0.226471	1.08501	360.4	49.94	0.105714	0.98501		318.5	45.61	0.129412	1.05335	373.3	41.56	0.15625	0.959815		319.1	41.58	0.083871	1.06343	380.2	40.9	9.72379	1.04604
312.3	36.72	0.220588	1.09612	369.3	54.03	-0.0771429	1.55706		320.2	54.24	-0.01875	1.06982	356.9	49.57	0.0354839	0.977712		321.9	46.05	-0.111765	1.06351	370.1	41.06	-0.0794118	0.948268		322.2	41.84	0.0147059	1.07008	376.8	42.2	9.63683	1.07928
315.7	37.47	-0.412903	1.11851	365.8	54.3	0.228571	1.56484		323.4	54.18	-0.305882	1.06864	353.8	49.46	0.00588235	0.975542		325.3	45.67	0.0375	1.05473	366.7	41.33	0.222857	0.954503		325.6	41.89	0.208824	1.07136	373.3	42.06	9.54731	1.0757
318.8	36.19	0.191176	1.0803	363	53.66	-0.30625	1.5464		326.8	53.14	-0.106452	1.04813	350.4	49.44	0.0885714	0.975148		328.5	45.79	0.0857143	1.05751	363.2	40.55	-0.173529	0.93649		329	42.6	-0.229412	1.08951	370.1	41.56	9.46547	1.06292
322.2	36.84	0.213793	1.0997	359.8	54.64	0.280645	1.57464		329.9	52.81	0.117857	1.04162	346.9	49.13	-0.135484	0.969034		331.3	46.03	0.0741935	1.06305	359.8	41.14	0.119355	0.950115		332.4	41.82	0.0645161	1.06957	366.7	41.83	9.37852	1.06982
325.1	37.46	-0.341935	1.11821	356.7	53.77	-0.251429	1.54957		332.7	53.14	-0.328571	1.04813	343.8	49.55	0.1	0.977318		334.4	46.26	0.110345	1.06836	356.7	40.77	0.034375	0.94157		335.5	42.02	0.11875	1.07468	363.2	41.55	9.289	1.06266
328.2	36.4	0.221429	1.08657	353.2	54.65	0.26129	1.57493		335.5	52.22	-0.225	1.02998	340.4	49.21	-0.0294118	0.970611		337.3	46.58	-0.5	1.07575	353.5	40.66	-0.187097	0.93903		338.7	42.4	-0.2	1.0844	360.1	41.74	9.20972	1.06752
331	37.02	0.0714286	1.10507	350.1	53.84	-0.441176	1.55159		338.7	51.5	-0.075	1.01578	337	49.31	0.0972973	0.972584		340.4	45.03	0.114706	1.03995	350.4	41.24	-0.028125	0.952425		341.8	41.78	0.154839	1.06854	356.9	41.17	9.12788	1.05294
333.8	37.22	-0.0551724	1.11104	346.7	55.34	0.203448	1.59481		341.5	51.29	-0.1625	1.01164	333.3	48.95	-0.0354839	0.965483		343.8	45.42	-0.235294	1.04896	347.2	41.33	0.151613	0.954503		344.9	42.26	-0.20625	1.08082	353.8	41.56	9.04859	1.06292
336.7	37.06	-0.0322581	1.10627	343.8	54.75	-0.112903	1.57781		344.7	50.77	-0.307143	1.00138	330.2	49.06	0.0875	0.967653		347.2	44.62	-0.0882353	1.03048	344.1	40.86	-0.217647	0.943649		348.1	41.6	-0.207143	1.06394	350.4	41.24	8.96164	1.05473
339.8	36.96	0.129032	1.10328	340.7	55.1	0.062069	1.5879		347.5	49.91	0.258621	0.984418	327	48.78	-0.0612903	0.96213		350.6	44.32	0.257143	1.02356	340.7	41.6	0.178125	0.960739		350.9	41.02	0.310345	1.0491	347.2	41.83	8.8798	1.06982
342.9	37.36	0.01875	1.11522	337.8	54.92	-0.335484	1.58271		350.4	50.66	-0.3	0.999211	323.9	48.97	-0.0935484	0.965878		354.1	45.22	-0.303226	1.04434	337.5	41.03	0.280645	0.947575		353.8	41.92	0.303226	1.07212	344.4	41.59	8.80818	1.06368
346.1	37.42	0.148387	1.11701	334.7	55.96	0.0483871	1.61268		353.2	49.82	-0.05625	0.982643	320.8	49.26	0.105882	0.971598		357.2	44.28	-0.09375	1.02263	334.4	40.16	-0.432353	0.927483		356.9	42.86	-0.553125	1.09616	341.2	41.01	8.72634	1.04885
349.2	37.88	-0.311765	1.13075	331.6	55.81	0.410345	1.60836		356.4	49.64	-0.185714	0.979093	317.4	48.9	0.0290323	0.964497		360.4	43.98	0.0677419	1.0157	331	41.63	0.264516	0.961432		360.1	41.09	0.235294	1.0509	338.7	41.38	8.6624	1.05831
352.6	36.82	-0.03125	1.0991	328.7	54.62	-0.0322581	1.57406		359.2	49.12	0.0482759	0.968836	314.3	48.81	0.111765	0.962722		363.5	44.19	-0.234286	1.02055	327.9	40.81	0.0354839	0.942494		363.5	41.89	-0.0628571	1.07136	335.8	41.29	8.58824	1.05601
355.8	36.72	0.196774	1.09612	325.6	54.72	-0.3	1.57695		362.1	49.26	-0.113793	0.971598	310.9	48.43	-0.1	0.955227		367	43.37	0.0903226	1.00162	324.8	40.7	-0.0193548	0.939954		367	41.67	-0.0709677	1.06573	333	40.36	8.51662	1.03223
358.9	37.33	0.144828	1.11433	322.8	55.56	0.122581	1.60115		365	48.93	-0.396774	0.965089	307.8	48.74	0.261765	0.961341		370.1	43.65	-0.0724138	1.00808	321.7	40.76	0.05	0.941339		370.1	41.45	-0.0628571	1.0601	330.2	41.16	8.44501	1.05269
361.8	37.75	0.0875	1.12687	319.7	55.18	0.00645161	1.5902		368.1	47.7	-0.0971429	0.940828	304.4	47.85	0.0433333	0.943787		373	43.44	-0.422857	1.00323	318.3	40.59	0.0709677	0.937413		373.6	41.23	0.00882353	1.05448	327	40.98	8.36317	1.04808
365	38.03	0.111765	1.13522	316.6	55.16	0.123529	1.58963		371.6	47.36	-0.0322581	0.934122	301.4	47.72	-0.279412	0.941223		376.5	41.96	0.376471	0.969053	315.2	40.37	0.0129032	0.932333		377	41.26	0.168571	1.05524	324.2	41.68	8.29156	1.06598
368.4	38.41	-0.128571	1.14657	313.2	54.74	-0.0258065	1.57752		374.7	47.26	-0.0973684	0.93215	298	48.67	0.23871	0.959961		379.9	43.24	-0.39375	0.998614	312.1	40.33	-0.0129032	0.931409		380.5	41.85	0.0371429	1.07033	321.1	40.76	8.21228	1.04246
371.9	37.96	0.129032	1.13313	310.1	54.82	0	1.57983		378.5	46.89	0.114706	0.924852	294.9	47.93	-0.158065	0.945365		383.1	41.98	0	0.969515	309	40.37	0.0580645	0.932333		384	41.98	-0.182353	1.07366	318	41.09	8.13299	1.0509
375	38.36	0.00857143	1.14507	306.7	54.82	0.0387097	1.57983		381.9	47.28	0.0289474	0.932544	291.8	48.42	0.193548	0.95503		386.3	41.98	0.158824	0.969515	305.9	40.19	-0.0258065	0.928176		387.4	41.36	0.360526	1.0578	314.9	40.15	8.05371	1.02685
378.5	38.39	-0.120588	1.14597	303.6	54.7	-0.190323	1.57637		385.7	47.39	-0.176316	0.934714	288.7	47.82	0.175	0.943195		389.7	42.52	-0.128571	0.981986	302.8	40.27	-0.00645161	0.930023		391.2	42.73	-0.328571	1.09284	311.5	40.83	7.96675	1.04425
381.9	37.98	-0.1875	1.13373	300.5	55.29	0.161765	1.59337		389.5	46.72	-0.0193548	0.921499	285.9	47.33	-0.153333	0.933531		393.2	42.07	-0.305263	0.971594	299.7	40.29	0.0735294	0.930485		394.7	41.58	-0.0228571	1.06343	308.4	41.5	7.88747	1.06138
385.1	37.38	0.01875	1.11582	297.1	54.74	0.04	1.57752		392.6	46.66	0.0114286	0.920316	282.9	47.79	-0.1	0.942604		397	40.91	0.128571	0.944804	296.3	40.04	0.0294118	0.924711		398.2	41.5	0.0323529	1.06138	305.3	40.67	7.80818	1.04015
388.3	37.44	0.340625	1.11761	294.1	54.62	-0.0258065	1.57406		396.1	46.7	-0.315625	0.921105	279.8	48.1	0.257143	0.948718		400.5	41.36	-0.146875	0.955196	292.9	39.94	0.00909091	0.922402		401.6	41.61	-0.0414634	1.06419	302.2	40.55	7.7289	1.03708
391.5	38.53	-0.0971429	1.15015	291	54.7	-0.155882	1.57637		399.3	45.69	0.278125	0.901183	277	47.38	-0.00714286	0.934517		403.7	40.89	-0.1375	0.944342	289.6	39.91	0.0290323	0.921709		405.7	41.44	-0.168571	1.05985	299.4	41.1	7.65729	1.05115
395	38.19	0.065625	1.14	287.6	55.23	0.178571	1.59164		402.5	46.58	-0.381579	0.918738	274.2	47.4	0.135714	0.934911		406.9	40.45	-0.24	0.93418	286.5	39.82	0.0647059	0.91963		409.2	40.85	0.0657143	1.04476	296.3	40.74	7.57801	1.04194
398.2	38.4	0.00294118	1.14627	284.8	54.73	-0.170968	1.57723		406.3	45.13	0.03125	0.890138	271.4	47.02	-0.286667	0.927416		410.4	39.61	-0.0542857	0.914781	283.1	39.6	-0.0633333	0.91455		412.7	41.08	0.491429	1.05064	293.2	40.45	7.49872	1.03453
401.6	38.41	0.0142857	1.14657	281.7	55.26	-0.12963	1.59251		409.5	45.23	-0.046875	0.89211	268.4	47.88	0.125	0.944379		413.9	39.42	0.325714	0.910393	280.1	39.79	0.1	0.918938		416.2	42.8	-0.359375	1.09463	290.1	40.4	7.41944	1.03325
405.1	38.46	-0.365625	1.14806	279	55.61	0.180645	1.60259		412.7	45.08	0.0914286	0.889152	265.6	47.53	-0.309677	0.937475		417.4	40.56	-0.090625	0.936721	277	39.48	-0.103226	0.911778		419.4	41.65	0.159375	1.06522	287.1	40.64	7.34271	1.03939
408.3	37.29	0.231429	1.11313	275.9	55.05	-0.0483871	1.58646		416.2	45.4	-0.115789	0.895464	262.5	48.49	0.45	0.95641		420.6	40.27	-0.00571429	0.930023	273.9	39.8	-0.00666667	0.919169		422.6	42.16	-0.114286	1.07826	283.7	40.52	7.25575	1.03632
411.8	38.1	0.0342857	1.13731	272.8	55.2	0.132143	1.59078		420	44.96	-0.0142857	0.886785	259.5	47.14	0.109677	0.929783		424.1	40.25	-0.0105263	0.929561	270.9	39.82	0.0741935	0.91963		426.1	41.76	-0.00555556	1.06803	280.6	40.48	7.17647	1.03529
415.3	38.22	-0.003125	1.1409	270	54.83	-0.062963	1.58012		423.5	44.91	0.14375	0.885799	256.4	46.8	-0.407407	0.923077		427.9	40.21	0.151429	0.928637	267.8	39.59	0.0424242	0.914319		429.7	41.74	0.06875	1.06752	277.6	40.6	7.09974	1.03836
418.5	38.21	0.206061	1.1406	267.3	55	0.177419	1.58501		426.7	45.37	-0.1	0.894872	253.7	47.9	0.0678571	0.944773		431.4	40.74	-0.2	0.940878	264.5	39.45	0.0129032	0.911085		432.9	41.96	-0.05	1.07315	274.5	40	7.02046	1.02302
421.8	38.89	0.0942857	1.1609	264.2	54.45	-0.378571	1.56916		430	45.04	-0.168571	0.888363	250.9	47.71	-0.0321429	0.941026		434.9	40.04	0.0641026	0.924711	261.4	39.41	-0.0333333	0.910162		436.7	41.77	-0.0875	1.06829	271.2	40.62	6.93606	1.03887
425.3	39.22	-0.28	1.17075	261.4	55.51	0.225926	1.59971		433.5	44.45	0.0657143	0.876726	248.1	47.8	0.151852	0.942801		438.8	40.29	-0.1	0.930485	258.7	39.5	-0.0322581	0.91224		439.9	41.49	0.25	1.06113	268.1	40.19	6.85678	1.02788
428.8	38.24	0.040625	1.14149	258.7	54.9	0.193548	1.58213		437	44.68	-0.0114286	0.881262	245.4	47.39	0.083871	0.934714		442.6	39.91	-0.00571429	0.921709	255.6	39.6	-0.0533333	0.91455		443.5	42.39	-0.254286	1.08414	264.8	40.34	6.77238	1.03171
432	38.37	-0.177143	1.14537	255.6	54.3	-0.02	1.56484		440.5	44.64	0.00833333	0.880473	242.3	47.13	0.09	0.929586		446.1	39.89	0.0138889	0.921247	252.6	39.76	0.157143	0.918245		447	41.5	-0.0861111	1.06138	261.4	41.01	6.68542	1.04885
435.5	37.75	0.280556	1.12687	252.6	54.36	-0.116129	1.56657		444.1	44.67	-0.305263	0.881065	239.3	46.86	-0.151852	0.92426		449.7	39.94	-0.421053	0.922402	249.8	39.32	0.0857143	0.908083		450.6	41.19	0.271429	1.05345	258.4	40.1	6.6087	1.02558
439.1	38.76	-0.075	1.15701	249.5	54.72	0.303704	1.57695		447.9	43.51	0.165789	0.858185	236.6	47.27	0.414286	0.932347		453.5	38.34	0.222222	0.88545	247	39.08	-0.0466667	0.90254		454.1	42.14	-0.152778	1.07775	255.3	40.74	6.52941	1.04194
442.3	38.52	0.0485714	1.14985	246.8	53.9	-0.0709677	1.55331		451.7	44.14	-0.0611111	0.870611	233.8	46.11	-0.366667	0.909467		457.1	39.14	-0.0421053	0.903926	244	39.22	0.114286	0.905774		457.7	41.59	0.059375	1.06368	252.3	40.15	6.45269	1.02685
445.8	38.69	-0.17	1.15493	243.7	54.12	-0.0333333	1.55965		455.3	43.92	0.171429	0.866272	231.1	47.1	0.292	0.928994		460.9	38.98	0.261111	0.900231	241.2	38.9	-0.18	0.898383		460.9	41.78	-0.0166667	1.06854	249.5	39.82	6.38107	1.01841
448.8	38.18	0.11875	1.1397	241	54.21	0.0193548	1.56225		458.8	44.52	-0.274359	0.878107	228.6	46.37	-0.142857	0.914596		464.5	39.92	-0.313158	0.92194	238.2	39.44	0.0296296	0.910855		464.5	41.72	0.14	1.06701	246.8	40.1	6.31202	1.02558
452	38.56	0.0722222	1.15104	237.9	54.15	0.037037	1.56052		462.7	43.45	0.00833333	0.857002	225.8	46.77	0.162963	0.922485		468.3	38.73	0.241667	0.894457	235.5	39.36	0.196774	0.909007		468	42.21	-0.113889	1.07954	244	40.22	6.24041	1.02864
455.6	38.82	-0.0257143	1.15881	235.2	54.05	-0.204	1.55764		466.3	43.48	0.15625	0.857594	223.1	46.33	0.0222222	0.913807		471.9	39.6	0.0277778	0.91455	232.4	38.75	0.0592593	0.894919		471.6	41.8	0.29697	1.06905	241.2	40.6	6.1688	1.03836
459.1	38.73	0.207692	1.15612	232.7	54.56	0.17037	1.57233		469.5	43.98	0.0111111	0.867456	220.4	46.27	-0.213333	0.912623		475.5	39.7	-0.19697	0.916859	229.7	38.59	-0.0966667	0.891224		474.9	42.78	-0.515152	1.09412	238.5	38.84	6.09974	0.99335
463	39.54	-0.109091	1.1803	230	54.1	0.15	1.55908		473.1	44.02	-0.2	0.868245	217.4	46.91	0.203226	0.925247		478.8	39.05	0.2375	0.901848	226.7	38.88	-0.016129	0.897921		478.2	41.08	0.190625	1.05064	235.7	40.18	6.02813	1.02762
466.3	39.18	0.0552632	1.16955	227.2	53.68	-0.0296296	1.54697		477	43.24	0.075	0.85286	214.3	46.28	-0.155556	0.912821		482	39.81	0.0944444	0.9194	223.6	38.93	0.12963	0.899076		481.4	41.69	0	1.06624	233	39.99	5.95908	1.02276
470.1	39.39	0.190909	1.17582	224.5	53.76	0.0392857	1.54928		480.2	43.48	0.327778	0.857594	211.6	46.7	0.22963	0.921105		485.6	40.15	-0.188889	0.927252	220.9	38.58	-0.00666667	0.890993		484.7	41.69	-0.193939	1.06624	230	40.2	5.88235	1.02813
473.4	40.02	-0.0512821	1.19463	221.7	53.65	-0.23	1.54611		483.8	44.66	-0.244444	0.880868	208.9	46.08	0.181481	0.908876		489.2	39.47	-0.075	0.911547	217.9	38.6	-0.0592593	0.891455		488	41.05	0.230303	1.04987	227.2	39.38	5.81074	1.00716
477.3	39.82	0.1	1.18866	218.7	54.34	0.192593	1.56599		487.4	43.78	0.0111111	0.863511	206.2	45.59	-0.189286	0.899211		492.8	39.2	0.4	0.905312	215.2	38.76	0.0166667	0.89515		491.3	41.81	0.257576	1.06931	224.5	39.26	5.74169	1.00409
480.8	40.17	-0.251282	1.1991	216	53.82	-0.0703704	1.55101		491	43.82	0.0333333	0.8643	203.4	46.12	0	0.909665		496.4	40.64	-0.361111	0.938568	212.2	38.71	0.106667	0.893995		494.6	42.66	-0.236364	1.09105	221.5	39.56	5.66496	1.01176
484.7	39.19	0.280556	1.16985	213.3	54.01	0.13871	1.55648		494.9	43.95	0.0897436	0.866864	200.7	46.12	0.281481	0.909665		500	39.34	0.206061	0.908545	209.2	38.39	0.0714286	0.886605		497.9	41.88	0.0818182	1.0711	218.7	40.44	5.59335	1.03427
488.3	40.2	-0.145455	1.2	210.2	53.58	-0.0555556	1.54409		498.8	44.3	-0.106061	0.873767	198	45.36	-0.19	0.894675		503.3	40.02	-0.05	0.924249	206.4	38.19	-0.118519	0.881986		501.2	42.15	-0.0515152	1.07801	215.7	39.82	5.51662	1.01841
491.6	39.72	0.251515	1.18567	207.5	53.73	0.218519	1.54841		502.1	43.95	0.0527778	0.866864	195	45.93	-0.0296296	0.905917		506.3	39.87	-0.306667	0.920785	203.7	38.51	-0.0037037	0.889376		504.5	41.98	-0.0433333	1.07366	213	39.61	5.44757	1.01304
494.9	40.55	-0.472727	1.21045	204.8	53.14	0.0666667	1.53141		505.7	44.14	0.419444	0.870611	192.3	46.01	-0.166667	0.907495		509.3	38.95	0.511765	0.899538	201	38.52	-0.08	0.889607		507.5	41.85	0.0617647	1.07033	210.2	39.08	5.37596	0.999488
498.2	38.99	0.321212	1.16388	202.1	52.96	-0.0607143	1.52622		509.3	45.65	-0.0176471	0.900394	189.6	46.46	0.22963	0.916371		512.7	40.69	-0.40303	0.939723	198	38.76	0.122222	0.89515		510.9	42.06	-0.138889	1.0757	207.5	39.33	5.30691	1.00588
501.5	40.05	0.176667	1.19552	199.3	53.13	0.151852	1.53112		512.7	45.59	-0.341026	0.899211	186.9	45.84	-0.107407	0.904142		516	39.36	0.115152	0.909007	195.3	38.43	-0.0933333	0.887529		514.5	41.56	0.215152	1.06292	204.5	39.43	5.23018	1.00844
504.5	40.58	0.166667	1.21134	196.6	52.72	-0.277778	1.51931		516.6	44.26	0.263889	0.872978	184.2	46.13	0.107143	0.909862		519.3	39.74	-0.0242424	0.917783	192.3	38.71	0.05	0.893995		517.8	42.27	0.177778	1.08107	201.8	39.57	5.16113	1.01202
508.1	41.18	0.159459	1.22925	193.9	53.47	0.037037	1.54092		520.2	45.21	-0.0567568	0.891716	181.4	45.83	0.0551724	0.903945		522.6	39.66	0.0918919	0.915935	189.3	38.56	-0.0259259	0.890531		521.4	42.91	-0.308824	1.09744	199.1	39.14	5.09207	1.00102
511.8	41.77	-0.447222	1.24687	191.2	53.37	0.0444444	1.53804		523.9	45	-0.141667	0.887574	178.5	45.67	-0.0555556	0.900789		526.3	40	0.342424	0.923788	186.6	38.63	0.0185185	0.892148		524.8	41.86	0.0939394	1.07059	196.4	38.72	5.02302	0.990281
515.4	40.16	0.633333	1.19881	188.5	53.25	-0.02	1.53458		527.5	44.49	0.136364	0.877515	175.8	45.82	-0.222222	0.903748		529.6	41.13	-0.345161	0.949885	183.9	38.58	0.02	0.890993		528.1	42.17	0.175758	1.07852	193.6	39.28	4.95141	1.0046
518.7	42.25	-0.311111	1.26119	186	53.3	-0.0259259	1.53602		530.8	44.94	-0.01	0.886391	173.1	46.42	0.640741	0.915582		532.7	40.06	-0.0030303	0.925173	180.9	38.52	0.0333333	0.889607		531.4	42.75	-0.367647	1.09335	190.9	39.78	4.88235	1.01739
521.4	41.41	-0.174194	1.23612	183.3	53.37	-0.0148148	1.53804		534.8	44.9	0.175758	0.885602	170.4	44.69	-0.204167	0.88146		536	40.05	0.116216	0.924942	177.9	38.42	-0.037037	0.887298		534.8	41.5	0.0848485	1.06138	187.9	39.75	4.80563	1.01662
524.5	40.87	0.124242	1.22	180.6	53.41	0.292593	1.53919		538.1	45.48	-0.164706	0.897041	168	45.18	0.0777778	0.891124		539.7	40.48	0.197222	0.934873	175.2	38.52	0.117241	0.889607		538.1	41.78	0.129412	1.06854	185.5	39.48	4.74425	1.00972
527.8	41.28	0.380556	1.23224	177.9	52.62	-0.185185	1.51643		541.5	44.92	0.372222	0.885996	165.3	44.97	-0.024	0.886982		543.3	41.19	-0.0705882	0.95127	172.3	38.18	0	0.881755		541.5	42.22	0.160606	1.0798	182.5	39.45	4.66752	1.00895
531.4	42.65	-0.455882	1.27313	175.2	53.12	-0.0296296	1.53084		545.1	46.26	0.144118	0.912426	162.8	45.03	-0.207692	0.888166		546.7	40.95	0.0666667	0.945727	169.6	38.18	0.111111	0.881755		544.8	42.75	-0.3	1.09335	179.8	39.2	4.59847	1.00256
534.8	41.1	0.387879	1.22687	172.5	53.2	0.0740741	1.53314		548.5	46.75	-0.283784	0.922091	160.2	45.57	0.185185	0.898817		549.7	41.15	0.0176471	0.950346	166.9	37.88	0.00666667	0.874827		548.2	41.73	0.151351	1.06726	177.1	38.92	4.52941	0.995396
538.1	42.38	-0.129032	1.26507	169.8	53	-0.165517	1.52738		552.2	45.7	0.235	0.901381	157.5	45.07	-0.00740741	0.888955		553.1	41.21	-0.0216216	0.951732	163.9	37.86	-0.0296296	0.874365		551.9	42.29	0.223333	1.08159	174.2	39.24	4.45524	1.00358
541.2	41.98	0.0787879	1.25313	166.9	53.48	0.318519	1.54121		556.2	46.64	0.186111	0.919921	154.8	45.09	-0.133333	0.889349		556.8	41.13	-0.0939394	0.949885	161.2	37.94	0.0296296	0.876212		554.9	42.96	-0.0441176	1.09872	171.5	39.09	4.38619	0.999744
544.5	42.24	0.376471	1.2609	164.2	52.62	-0.0259259	1.51643		559.8	47.31	-0.158824	0.933136	152.4	45.41	0.025	0.895661		560.1	40.82	-0.0806452	0.942725	158.5	37.86	-0.0846154	0.874365		558.3	42.81	-0.0705882	1.09488	168.5	38.98	4.30946	0.996931
547.9	43.52	0.0806452	1.2991	161.5	52.69	0.120833	1.51844		563.2	46.77	-0.3	0.922485	150	45.35	-0.118519	0.894477		563.2	40.57	-0.182143	0.936952	155.9	38.08	0.0740741	0.879446		561.7	42.57	-0.233333	1.08875	165.8	39.5	4.24041	1.01023
551	43.77	-0.030303	1.30657	159.1	52.4	-0.214815	1.51009		566.3	45.84	-0.108824	0.904142	147.3	45.67	0.05	0.900789		566	40.06	-0.16129	0.925173	153.2	37.88	-0.186667	0.874827		564.4	41.94	0.170968	1.07263	163.1	38.94	4.17136	0.995908
554.3	43.67	0.45	1.30358	156.4	52.98	0.0296296	1.5268		569.7	45.47	-2.07647	0.896844	144.9	45.55	0.592593	0.898422		569.1	39.56	-1.06	0.913626	150.2	38.44	0.373077	0.88776		567.5	42.47	-0.960714	1.08619	160.4	38.56	4.1023	0.986189
557.7	45.2	-0.152941	1.34925	153.7	52.9	0.274074	1.5245		573.1	38.41	-3.85676	0.757594	142.2	43.95	-0.258333	0.866864		572.1	36.38	-3.42857	0.840185	147.6	37.47	-0.214815	0.865358		570.3	39.78	-2.17742	1.01739	157.7	38.97	4.03325	0.996675
561.1	44.68	-0.10303	1.33373	151	52.16	-0.0708333	1.50317		576.8	24.14	-2.80541	0.476134	139.8	44.57	-0.0185185	0.879093		574.9	26.78	-2.54706	0.618476	144.9	38.05	0	0.878753		573.4	33.03	-3.30741	0.844757	154.8	38.49	3.95908	0.984399
564.4	44.34	0.267742	1.32358	148.6	52.33	-0.155556	1.50807		580.5	13.76	-1.55	0.2714	137.1	44.62	0.0615385	0.880079		578.3	18.12	-2.12941	0.418476	142.2	38.05	0.181481	0.878753		576.1	24.1	-2.18235	0.616368	152.1	38.82	3.89003	0.992839
567.5	45.17	-1.05806	1.34836	145.9	52.75	0.0541667	1.52017		584.5	7.56	-0.948649	0.149112	134.5	44.46	0.145833	0.876923		581.7	10.88	-1.37838	0.25127	139.5	37.56	-0.0192308	0.867436		579.5	16.68	-1.87647	0.426598	149.4	38.38	3.82097	0.981586
570.6	41.89	-2.39412	1.25045	143.5	52.62	0.207692	1.51643		588.2	4.05	-0.4975	0.0798817	132.1	44.11	0.0259259	0.87002		585.4	5.78	-0.437838	0.133487	136.9	37.61	0.0962963	0.868591		582.9	10.3	-0.682857	0.263427	146.7	38.66	3.75192	0.988747
574	33.75	-3.55676	1.00746	140.9	52.08	-0.0888889	1.50086		592.2	2.06	-0.137143	0.0406312	129.4	44.04	-0.385185	0.868639		589.1	4.16	-0.451613	0.0960739	134.2	37.35	-0.0037037	0.862587		586.4	7.91	-0.632353	0.202302	144.3	39.08	3.69054	0.999488
577.7	20.59	-3.35882	0.614627	138.2	52.32	0.241667	1.50778		595.7	1.58	-0.0108108	0.0311637	126.7	45.08	0.207692	0.889152		592.2	2.76	-0.194286	0.0637413	131.5	37.36	0.0689655	0.862818		589.8	5.76	-0.593548	0.147315	141.7	38.83	3.62404	0.993095
581.1	9.17	-0.945946	0.273731	135.8	51.74	0.0407407	1.49107		599.4	1.54	0.126471	0.0303748	124.1	44.54	0.140741	0.878501		595.7	2.08	-0.0588235	0.048037	128.6	37.16	-0.159259	0.858199		592.9	3.92	-0.0322581	0.100256	139	38.24	3.55499	0.978005
584.8	5.67	-0.682353	0.169254	133.1	51.63	-0.0192308	1.4879		602.8	1.97	-0.215789	0.038856	121.4	44.16	-0.0538462	0.871006		599.1	1.88	-0.202941	0.043418	125.9	37.59	0.138462	0.868129		596	3.82	0.148387	0.0976982	136.3	38.67	3.48593	0.989003
588.2	3.35	-0.448387	0.1	130.5	51.68	-0.037037	1.48934		606.6	1.15	-0.00967742	0.0226824	118.8	44.3	-0.111111	0.873767		602.5	1.19	0.0676471	0.0274827	123.3	37.23	-0.0958333	0.859815		599.1	4.28	0.132432	0.109463	133.4	38.04	3.41176	0.97289
591.3	1.96	-0.0676471	0.0585075	127.8	51.78	-0.113793	1.49222		609.7	1.12	-0.0647059	0.0220907	116.1	44.6	0.0269231	0.879684		605.9	1.42	-0.311429	0.0327945	120.9	37.46	-0.0962963	0.865127		602.8	4.77	-0.125714	0.121995	130.7	37.6	3.34271	0.961637
594.7	1.73	-0.0419355	0.0516418	124.9	52.11	0.185185	1.50173		613.1	0.9	0.134375	0.0177515	113.5	44.53	-0.0777778	0.878304		609.4	0.33	0.282353	0.00762125	118.2	37.72	0.13913	0.871132		606.3	4.33	-0.272973	0.110742	127.8	38.48	3.26854	0.984143
597.8	1.6	0.0142857	0.0477612	122.2	51.61	-0.0269231	1.48732		616.3	1.33	0.313514	0.0262327	110.8	44.74	-0.0961538	0.882446		612.8	1.29	0.271053	0.0297921	115.9	37.4	-0.0111111	0.863741		610	3.32	0.316129	0.0849105	125.2	38.5	3.20205	0.984655
601.3	1.65	0.270588	0.0492537	119.6	51.68	-0.0758621	1.48934		620	2.49	-0.339474	0.0491124	108.2	44.99	0.175	0.887377		616.6	2.32	-0.3	0.0535797	113.2	37.43	-0.123077	0.864434		613.1	4.3	-0.396875	0.109974	122.5	38.22	3.13299	0.977494
604.7	2.57	-0.617647	0.0767164	116.7	51.9	0.251852	1.49568		623.8	1.2	0.0609756	0.0236686	105.8	44.57	0.0958333	0.879093		620.3	1.21	0.152632	0.0279446	110.6	37.75	0.108333	0.871824		616.3	3.03	0.0642857	0.0774936	119.8	38.27	3.06394	0.978772
608.1	0.47	0.38	0.0140299	114	51.22	-0.188462	1.47608		627.9	1.45	0.313514	0.0285996	103.4	44.34	0.0304348	0.874556		624.1	1.79	-0.242857	0.0413395	108.2	37.49	0.05	0.86582		619.1	3.21	0.05	0.0820972	117.2	38.23	2.99744	0.977749
610.6	1.42	0.125	0.0423881	111.4	51.71	0.0583333	1.4902		631.6	2.61	-0.451429	0.0514793	101.1	44.27	0.0318182	0.873176		627.6	0.94	0.192857	0.021709	105.8	37.37	-0.0708333	0.863048		621.9	3.35	-0.108	0.0856777	114.5	38.22	2.92839	0.977494
613.8	1.82	-0.0967742	0.0543284	109	51.57	-0.0444444	1.48617		635.1	1.03	-0.182857	0.0203156	98.9	44.2	0.052381	0.871795		630.4	1.48	0.128571	0.0341801	103.4	37.54	0.0809524	0.866975		624.4	3.08	0.20625	0.0787724	111.9	38.68	2.86189	0.989258
616.9	1.52	0.114706	0.0453731	106.3	51.69	0.195652	1.48963		638.6	0.39	0.331579	0.00769231	96.8	44.09	0.0571429	0.869625		633.2	1.84	-0.386207	0.0424942	101.3	37.37	0.0708333	0.863048		627.6	3.74	-0.161765	0.0956522	109.5	38.45	2.80051	0.983376
620.3	1.91	-0.15625	0.0570149	104	51.24	-0.0136364	1.47666		642.4	1.65	0.0628571	0.0325444	94.7	43.97	-0.0944444	0.867258		636.1	0.72	0.128571	0.0166282	98.9	37.2	0.052381	0.859122		631	3.19	0.268571	0.0815857	107.1	38.33	2.73913	0.980307
623.5	1.41	0.125806	0.0420896	101.8	51.27	-0.171429	1.47752		645.9	1.87	-0.181579	0.0368836	92.9	44.14	-0.161905	0.870611		638.9	1.08	0.15	0.0249423	96.8	37.09	-0.0857143	0.856582		634.5	4.13	-0.1	0.105627	104.8	38.84	2.68031	0.99335
626.6	1.8	-0.025	0.0537313	99.7	51.63	0.142857	1.4879		649.7	1.18	0.182857	0.0232742	90.8	44.48	0.166667	0.877318		641.7	1.5	0	0.034642	94.7	37.27	0.0142857	0.860739		637.6	3.82	0.0947368	0.0976982	102.6	38.56	2.62404	0.986189
629.8	1.72	-0.251613	0.0513433	97.6	51.33	-0.157143	1.47925		653.2	1.82	-0.377419	0.0358974	88.4	44.08	-0.047619	0.869428		644.6	1.5	-0.00625	0.034642	92.6	37.24	0.0714286	0.860046		641.4	4.18	-0.102857	0.106905	100.3	38.26	2.56522	0.978517
632.9	0.94	-0.0605263	0.0280597	95.5	51.66	0.0380952	1.48876		656.3	0.65	0.53125	0.0128205	86.3	44.18	0.0285714	0.8714		647.8	1.48	-0.00294118	0.0341801	90.5	37.09	-0.0391304	0.856582		644.9	3.82	-0.155263	0.0976982	98.2	38.07	2.51151	0.973657
636.7	0.71	0.18	0.021194	93.4	51.58	0.219048	1.48646		659.5	2.35	-0.431429	0.0463511	84.2	44.12	-0.0611111	0.870217		651.2	1.47	0.053125	0.0339492	88.2	37.18	0.0380952	0.858661		648.7	3.23	-0.15	0.0826087	96	38.15	2.45524	0.975703
640.2	1.34	0.180488	0.04	91.3	51.12	-0.138095	1.4732		663	0.84	0.285714	0.016568	82.4	44.23	0.0666667	0.872387		654.4	1.64	-0.168571	0.0378753	86.1	37.1	-0.00952381	0.856813		652.5	2.66	0.170732	0.0680307	93.7	38.28	2.39642	0.979028
644.3	2.08	-0.110526	0.0620896	89.2	51.41	-0.0809524	1.48156		666.5	1.84	0.154762	0.0362919	80.3	44.09	0.2	0.869625		657.9	1.05	0.160526	0.0242494	84	37.12	-0.104762	0.857275		656.6	3.36	0.371429	0.0859335	91.6	38.03	2.34271	0.972634
648.1	1.66	-0.236842	0.0495522	87.1	51.58	0.128571	1.48646		670.7	2.49	0.0795455	0.0491124	78.2	43.67	-0.238889	0.861341		661.7	1.66	-0.0142857	0.0383372	81.9	37.34	0.12381	0.862356		660.1	4.66	-0.294286	0.119182	89.5	38.2	2.289	0.976982
651.9	0.76	0.4625	0.0226866	85	51.31	-0.0666667	1.47867		675.1	2.84	-0.233333	0.0560158	76.4	44.1	0.0809524	0.869822		665.9	1.6	0.131818	0.0369515	79.8	37.08	0.0571429	0.856351		663.6	3.63	-0.271875	0.0928389	87.1	37.78	2.22762	0.96624
655.1	2.24	-0.425714	0.0668657	83.2	51.43	0.0619048	1.48213		679	1.93	-0.122857	0.0380671	74.3	43.93	-0.0736842	0.866469		670.3	2.18	0.194872	0.0503464	77.7	36.96	-0.0333333	0.85358		666.8	2.76	-0.0435897	0.0705882	85	38.01	2.17391	0.972123
658.6	0.75	0.164516	0.0223881	81.1	51.3	0.2	1.47839		682.5	1.5	0.0342857	0.0295858	72.4	44.07	0.227778	0.869231		674.2	2.94	-0.202632	0.0678984	75.6	37.03	0.00526316	0.855196		670.7	2.59	0.0394737	0.0662404	82.9	38.43	2.1202	0.982864
661.7	1.26	0.228571	0.0376119	79	50.88	-0.285714	1.46628		686	1.62	-0.289655	0.0319527	70.6	43.66	-0.294444	0.861144		678	2.17	-0.588095	0.0501155	73.7	37.02	-0.12381	0.854965		674.5	2.74	0.268421	0.0700767	80.8	38.19	2.0665	0.976726
665.2	2.06	-0.189655	0.0614925	76.9	51.48	0.119048	1.48357		688.9	0.78	-0.0848485	0.0153846	68.8	44.19	0.0736842	0.871598		682.2	-0.3	0.577143	-0.00692841	71.6	37.28	0.0666667	0.86097		678.3	3.76	-0.0380952	0.0961637	78.7	38.17	2.01279	0.976215
668.1	1.51	0.125714	0.0450746	74.8	51.23	0.0761905	1.47637		692.2	0.5	0.289655	0.00986193	66.9	44.05	0.0944444	0.868836		685.7	1.72	-0.148718	0.0397229	69.8	37.16	0.0285714	0.858199		682.5	3.6	-0.383333	0.0920716	76.6	38.49	1.95908	0.984399
671.6	1.95	-0.065625	0.058209	72.7	51.07	-0.05	1.47176		695.1	1.34	-0.206897	0.02643	65.1	43.88	0.05	0.865483		689.6	1.14	-0.202857	0.0263279	67.7	37.1	0.0555556	0.856813		686.7	1.99	0.276316	0.0508951	74.5	38.03	1.90537	0.972634
674.8	1.74	-0.025641	0.0519403	70.9	51.16	0.22381	1.47435		698	0.74	0.365625	0.0145957	63.5	43.8	0.0277778	0.863905		693.1	0.43	0.113889	0.00993072	65.9	37	-0.0444444	0.854503		690.5	3.04	0.264103	0.0777494	72.7	38.47	1.85934	0.983887
678.7	1.64	-0.352632	0.0489552	68.8	50.69	0.0210526	1.46081		701.2	1.91	-0.746154	0.0376726	61.7	43.75	-0.113333	0.862919		696.7	0.84	0.176316	0.0193995	64.1	37.08	-0.01875	0.856351		694.4	4.07	-0.321429	0.104092	70.6	38.16	1.80563	0.975959
682.5	0.3	0.06	0.00895522	66.9	50.65	-0.183333	1.45965		703.8	-0.03	0.4125	-0.000591716	60.2	43.92	0.1875	0.866272		700.5	1.51	-0.2	0.034873	62.5	37.11	-0.0888889	0.857044		698.6	2.72	0.35641	0.0695652	68.8	37.59	1.75959	0.961381
687	0.57	0.402381	0.0170149	65.1	50.98	-0.294444	1.46916		705.4	0.63	2.26667	0.012426	58.6	43.62	-0.111111	0.860355		704.8	0.65	0.0875	0.0150115	60.7	37.27	0.15	0.860739		702.5	4.11	-0.291429	0.105115	66.9	37.85	1.711	0.968031
691.2	2.26	-0.409524	0.0674627	63.3	51.51	0.2875	1.48444		706	1.99	-2.5	0.0392505	56.8	43.82	0.047619	0.8643		708	0.93	0.326316	0.0214781	58.9	37	-0.0105263	0.854503		706	3.09	-0.153333	0.0790281	65.1	37.78	1.66496	0.96624
695.4	0.54	-0.00714286	0.0161194	61.7	51.05	0.02	1.47118		706.4	0.99	0.00140147	0.0195266	54.7	43.72	0.05	0.862327		709.9	1.55	-0.55	0.0357968	57	37.02	0	0.854965		709	2.63	-0.00625	0.0672634	63.3	38.11	1.61893	0.97468
699.6	0.51	0.223077	0.0152239	60.2	51.02	0.105263	1.47032						52.1	43.59	-0.00384615	0.859763		710.9	1	-0.942857	0.0230947	55	37.02	-0.0241379	0.854965		710.6	2.62	1.26667	0.0670077	61.7	38.15	1.57801	0.975703
703.5	1.38	0.06875	0.041194	58.3	50.82	-0.0555556	1.46455						49.5	43.6	-0.0448276	0.859961		711.6	0.34	0.000477797	0.00785219	52.1	37.09	0.0655172	0.856582		710.9	3	0.00422	0.0767263	60.2	38.22	1.53964	0.977494
706.7	1.6	-0.305263	0.0477612	56.5	50.92	-0.047619	1.46744						46.6	43.73	-0.0391304	0.862525						49.2	36.9	-0.05	0.852194						58.3	38.02	1.49105	0.972379
708.6	1.02	-0.515385	0.0304478	54.4	51.02	0.0142857	1.47032						44.3	43.82	0.0434783	0.8643						46.6	37.03	0.0423077	0.855196						56.5	38.12	1.44501	0.974936
709.9	0.35	1.25	0.0104478	51.6	50.98	0.0275862	1.46916						42	43.72	-0.047619	0.862327						44	36.92	-0.0434783	0.852656						54.4	38.12	1.3913	0.974936
710.3	0.85	0.00119668	0.0253731	48.7	50.9	0.0230769	1.46686						39.9	43.82	1.09825	0.8643						41.7	37.02	0	0.854965						51.8	38.08	1.32481	0.973913
				46.1	50.84	-0.0285714	1.46513															39.4	37.02	0.939594	0.854965						49	37.9	1.2532	0.969309
				43.3	50.92	0.125	1.46744																								46.1	38.14	1.17903	0.975448
				40.9	50.62	-0.0869565	1.45879																								43.8	38.02	1.1202	0.972379
				38.6	50.82	#DIV/0!	1.46455																								41.5	37.92	1.06138	0.969821
				38.6	50.82	1.31658	1.46455																								39.4	38.02	1.00767	0.972379

## Sheet: Slow heating rate
Slow Heating				Slow Cooling					Followup Heating				Followup Cooling
TEMP	CSUSC	1st der	knorm	TEMP	CSUSC	1st der	knorm		TEMP	CSUSC	1st der	knorm	TEMP	CSUSC	1st der	knorm
28.3	25.86	-0.5	1	711.9	1.26	#DIV/0!	0.0487239		31.6	47.77	0.333333	1.84725	705.4	1.83	-1.55	0.0707657
28.5	25.76	-0.03125	0.996133	711.9	2.36	#DIV/0!	0.0912606		31.9	47.87	-0.206667	1.85112	704.8	2.76	0.229412	0.106729
30.1	25.71	0.0230769	0.9942	711.9	2.66	3.53333	0.102862		33.4	47.56	0.2125	1.83913	703.1	2.37	-0.354545	0.0916473
32.7	25.77	-0.0606061	0.99652	711.6	1.6	#DIV/0!	0.0618716		35.8	48.07	-0.153571	1.85886	700.9	3.15	0.334615	0.12181
36	25.57	0.114706	0.988786	711.6	3.4	3.65	0.131477		38.6	47.64	0.0911765	1.84223	698.3	2.28	-0.0423077	0.0881671
39.4	25.96	-0.0363636	1.00387	711.2	1.94	-2.73333	0.0750193		42	47.95	-0.0030303	1.85422	695.7	2.39	-0.230435	0.0924207
42.7	25.84	0.103125	0.999227	710.9	2.76	0.1	0.106729		45.3	47.94	-0.0352941	1.85383	693.4	2.92	-0.06	0.112916
45.9	26.17	0.0535714	1.01199	710.6	2.73	#DIV/0!	0.105568		48.7	47.82	0.190323	1.84919	690.9	3.07	0.293103	0.118716
48.7	26.32	-0.0413793	1.01779	710.6	2.53	-2.56667	0.0978345		51.8	48.41	0.021875	1.872	688	2.22	-0.053125	0.0858469
51.6	26.2	-0.0115385	1.01315	710.9	1.76	#DIV/0!	0.0680588		55	48.48	-0.0903226	1.87471	684.8	2.39	-0.0413793	0.0924207
54.2	26.17	0.130435	1.01199	710.9	1.56	#DIV/0!	0.0603248		58.1	48.2	-0.107143	1.86388	681.9	2.51	0.271875	0.0970611
56.5	26.47	0.0238095	1.02359	710.9	2.46	#DIV/0!	0.0951276		60.9	47.9	0.0384615	1.85228	678.7	1.64	-0.1	0.0634184
58.6	26.52	-0.242857	1.02552	710.9	1.96	#DIV/0!	0.0757927		63.5	48	-0.0777778	1.85615	675.8	1.93	-0.234483	0.0746326
60.7	26.01	0.17619	1.0058	710.9	1.26	-2.56667	0.0487239		66.2	47.79	0.203846	1.84803	672.9	2.61	0.182759	0.100928
62.8	26.38	0.16	1.02011	710.6	2.03	#DIV/0!	0.0784996		68.8	48.32	-0.113043	1.86852	670	2.08	0.303571	0.0804331
64.3	26.62	-0.278947	1.02939	710.6	1.23	#DIV/0!	0.0475638		71.1	48.06	-0.00416667	1.85847	667.2	1.23	-0.28125	0.0475638
66.2	26.09	0.353333	1.00889	710.6	1.83	-1.23333	0.0707657		73.5	48.05	0.0391304	1.85808	664	2.13	-0.0896552	0.0823666
67.7	26.62	-0.25	1.02939	710.9	1.46	#DIV/0!	0.0564578		75.8	48.14	0.0125	1.86156	661.1	2.39	0.028125	0.0924207
69.3	26.22	0.03125	1.01392	710.9	2.36	#DIV/0!	0.0912606		78.2	48.17	-0.226087	1.86272	657.9	2.3	-0.34375	0.0889404
70.9	26.27	-0.0230769	1.01585	710.9	1.96	#DIV/0!	0.0757927		80.5	47.65	0.266667	1.84261	654.7	3.4	0.512903	0.131477
72.2	26.24	-0.0692308	1.01469	710.9	2.36	#DIV/0!	0.0912606		82.6	48.21	-0.0208333	1.86427	651.6	1.81	-0.0655172	0.0699923
73.5	26.15	-0.0846154	1.01121	710.9	2.86	#DIV/0!	0.110596		85	48.16	0.0208333	1.86234	648.7	2	-0.147368	0.0773395
74.8	26.04	0.315385	1.00696	710.9	3.56	4.76667	0.137664		87.4	48.21	0.0217391	1.86427	644.9	2.56	0.0971429	0.0989946
76.1	26.45	-0.515385	1.02282	710.6	2.13	#DIV/0!	0.0823666		89.7	48.26	-0.233333	1.8662	641.4	2.22	0.0322581	0.0858469
77.4	25.78	0.29375	0.996906	710.6	2.33	#DIV/0!	0.0901005		92.1	47.7	0.441667	1.84455	638.3	2.12	-0.142857	0.0819799
79	26.25	-0.0692308	1.01508	710.6	3.33	#DIV/0!	0.12877		94.5	48.76	-0.347826	1.88554	634.8	2.62	-0.00285714	0.101315
80.3	26.16	0.20625	1.0116	710.6	1.83	#DIV/0!	0.0707657		96.8	47.96	0.208333	1.8546	631.3	2.63	-0.217647	0.101701
81.9	26.49	-0.153846	1.02436	710.6	2.23	0.733333	0.0862336		99.2	48.46	0.00833333	1.87394	627.9	3.37	0.134286	0.130317
83.2	26.29	-0.284615	1.01663	710.3	2.01	#DIV/0!	0.0777262		101.6	48.48	-0.075	1.87471	624.4	2.9	0.165789	0.112142
84.5	25.92	0.307692	1.00232	710.3	1.91	0.4	0.0738592		104	48.3	0	1.86775	620.6	2.27	-0.0354839	0.0877804
85.8	26.32	-0.230769	1.01779	710.6	2.03	#DIV/0!	0.0784996		106.3	48.3	0.233333	1.86775	617.5	2.38	-0.138235	0.092034
87.1	26.02	0.20625	1.00619	710.6	2.83	#DIV/0!	0.109435		108.7	48.86	-0.0148148	1.8894	614.1	2.85	0.0714286	0.110209
88.7	26.35	0.225	1.01895	710.6	2.53	#DIV/0!	0.0978345		111.4	48.82	-0.130769	1.88786	610.6	2.6	0.1	0.100541
90.3	26.71	-0.453846	1.03287	710.6	2.43	#DIV/0!	0.0939675		114	48.48	0.225926	1.87471	607.2	2.26	-0.247059	0.0873937
91.6	26.12	0.230769	1.01005	710.6	2.43	#DIV/0!	0.0939675		116.7	49.09	-0.188462	1.8983	603.8	3.1	0.194286	0.119876
92.9	26.42	0.3375	1.02166	710.6	1.53	#DIV/0!	0.0591647		119.3	48.6	-0.0814815	1.87935	600.3	2.42	-0.132353	0.0935808
94.5	26.96	-0.393333	1.04254	710.6	2.03	1.43333	0.0784996		122	48.38	0.0241379	1.87084	596.9	2.87	0.0864865	0.110982
96	26.37	0.2875	1.01972	710.9	2.46	#DIV/0!	0.0951276		124.9	48.45	0.025	1.87355	593.2	2.55	-0.627027	0.0986079
97.6	26.83	-0.16875	1.03751	710.9	1.66	#DIV/0!	0.0641918		127.3	48.51	-0.0538462	1.87587	589.5	4.87	-1.29032	0.188322
99.2	26.56	-0.08125	1.02707	710.9	0.96	#DIV/0!	0.037123		129.9	48.37	0.191667	1.87046	586.4	8.87	-3.52581	0.343001
100.8	26.43	-0.1125	1.02204	710.9	2.66	#DIV/0!	0.102862		132.3	48.83	-0.103704	1.88824	583.3	19.8	-3.55882	0.765661
102.4	26.25	0.09375	1.01508	710.9	2.56	#DIV/0!	0.0989946		135	48.55	0.162963	1.87742	579.9	31.9	-2.94194	1.23357
104	26.4	0.32	1.02088	710.9	3.06	#DIV/0!	0.118329		137.7	48.99	0.0384615	1.89443	576.8	41.02	-2.08387	1.58623
105.5	26.88	0.0357143	1.03944	710.9	2.56	-0.233333	0.0989946		140.3	49.09	-0.0592593	1.8983	573.7	47.48	-1.25806	1.83604
106.9	26.93	-0.025	1.04138	710.6	2.63	#DIV/0!	0.101701		143	48.93	0.0555556	1.89211	570.6	51.38	-0.505882	1.98685
108.5	26.89	-0.1	1.03983	710.6	2.43	#DIV/0!	0.0939675		145.7	49.08	-0.0851852	1.89791	567.2	53.1	-0.108108	2.05336
110	26.74	0.0571429	1.03403	710.6	2.03	#DIV/0!	0.0784996		148.4	48.85	-0.0153846	1.88902	563.5	53.5	0.0594595	2.06883
111.4	26.82	-0.0133333	1.03712	710.6	1.33	#DIV/0!	0.0514308		151	48.81	0.0851852	1.88747	559.8	53.28	0.287879	2.06032
112.9	26.8	0.23125	1.03635	710.6	2.33	#DIV/0!	0.0901005		153.7	49.04	-0.11	1.89637	556.5	52.33	0.00294118	2.02359
114.5	27.17	-0.247368	1.05066	710.6	2.73	#DIV/0!	0.105568		156.7	48.71	-0.0461538	1.8836	553.1	52.32	-0.0243243	2.0232
116.4	26.7	0.28125	1.03248	710.6	3.63	-5.9	0.140371		159.3	48.59	0.21	1.87896	549.4	52.41	0.0939394	2.02668
118	27.15	-0.28125	1.04988	710.9	1.86	-4.23333	0.0719258		162.3	49.22	-0.17	1.90333	546.1	52.1	0.0235294	2.01469
119.6	26.7	0.4375	1.03248	710.6	3.13	#DIV/0!	0.121036		165.3	48.71	0.262963	1.8836	542.7	52.02	-0.126667	2.0116
121.2	27.4	-0.0888889	1.05955	710.6	2.13	#DIV/0!	0.0823666		168	49.42	-0.17931	1.91106	539.7	52.4	-0.00540541	2.0263
123	27.24	-0.24375	1.05336	710.6	2.53	7.06667	0.0978345		170.9	48.9	0.148148	1.89095	536	52.42	0.0222222	2.02707
124.6	26.85	-0.0157895	1.03828	710.3	0.41	-1.05714	0.0158546		173.6	49.3	-0.481481	1.90642	532.4	52.34	0.355882	2.02398
126.5	26.82	0.0944444	1.03712	709.6	1.15	-0.66	0.0444702		176.3	48	0.393333	1.85615	529	51.13	-0.0638889	1.97718
128.3	26.99	-0.2	1.0437	708.6	1.81	-0.422222	0.0699923		179.3	49.18	-0.06	1.90178	525.4	51.36	-0.144118	1.98608
129.9	26.67	0.0789474	1.03132	707.7	2.19	-0.2	0.0846868		182.3	49	0.0206897	1.89482	522	51.85	0.547222	2.00503
131.8	26.82	0.4625	1.03712	706.4	2.45	-1.31538	0.0947409		185.2	49.06	0.177778	1.89714	518.4	49.88	-0.281818	1.92885
133.4	27.56	-0.44375	1.06574	705.1	4.16	1.195	0.160866		187.9	49.54	0.178571	1.9157	515.1	50.81	-0.248485	1.96481
135	26.85	-0.2125	1.03828	703.1	1.77	-0.3875	0.0684455		190.7	50.04	-0.427586	1.93503	511.8	51.63	0.0235294	1.99652
136.6	26.51	0.3	1.02514	701.5	2.39	-0.35	0.0924207		193.6	48.8	0.457143	1.88708	508.4	51.55	-0.188889	1.99343
138.2	26.99	0.175	1.0437	699.9	2.95	0.113043	0.114076		196.4	50.08	0.0413793	1.93658	504.8	52.23	0.538889	2.01972
139.8	27.27	-0.28125	1.05452	697.6	2.69	0.0526316	0.104022		199.3	50.2	-0.1	1.94122	501.2	50.29	-0.158333	1.9447
141.4	26.82	-0.05625	1.03712	695.7	2.59	0.252632	0.100155		201.8	49.95	-0.0533333	1.93155	497.6	50.86	0.075	1.96674
143	26.73	0.23125	1.03364	693.8	2.11	0.7	0.0815932		204.8	49.79	0.137037	1.92537	494	50.59	-0.0424242	1.9563
144.6	27.1	0.0368421	1.04795	692.2	0.99	-1.03	0.0382831		207.5	50.16	-0.23	1.93968	490.7	50.73	0.0727273	1.96172
146.5	27.17	0.10625	1.05066	690.2	3.05	0.168421	0.117943		210.5	49.47	0.0571429	1.91299	487.4	50.49	-0.154545	1.95244
148.1	27.34	-0.1875	1.05723	688.3	2.73	0.152174	0.105568		213.3	49.63	-0.06	1.91918	484.1	51	0.118182	1.97216
149.7	27.04	0.3	1.04563	686	2.38	-0.0636364	0.092034		216.3	49.45	0.273333	1.91222	480.8	50.61	0.3875	1.95708
151.3	27.52	0.0125	1.06419	683.8	2.52	-0.257895	0.0974478		219.3	50.27	-0.29	1.94393	477.6	49.37	0.124242	1.90913
152.9	27.54	-0.157895	1.06497	681.9	3.01	0.113043	0.116396		222.3	49.4	0.186667	1.91029	474.3	48.96	-0.239394	1.89327
154.8	27.24	0.23125	1.05336	679.6	2.75	0.204545	0.106342		225.3	49.96	0.0444444	1.93194	471	49.75	0.186667	1.92382
156.4	27.61	0.189474	1.06767	677.4	2.3	0.147368	0.0889404		228	50.08	-0.0709677	1.93658	468	49.19	-0.248571	1.90217
158.3	27.97	-0.205263	1.08159	675.5	2.02	-0.0869565	0.0781129		231.1	49.86	0.0333333	1.92807	464.5	50.06	0.178788	1.93581
160.2	27.58	-0.03125	1.06651	673.2	2.22	-0.0105263	0.0858469		234.1	49.96	0.163333	1.93194	461.2	49.47	-0.228571	1.91299
161.8	27.53	0.0388889	1.06458	671.3	2.24	-0.194737	0.0866203		237.1	50.45	0.175	1.95089	457.7	50.27	0.230303	1.94393
163.6	27.6	-0.284211	1.06729	669.4	2.61	0.0368421	0.100928		239.9	50.94	-0.14	1.96984	454.4	49.51	0.0542857	1.91454
165.5	27.06	0.326316	1.0464	667.5	2.54	-0.215789	0.0982212		242.9	50.52	0.0766667	1.9536	450.9	49.32	-0.00833333	1.90719
167.4	27.68	-0.275	1.07038	665.6	2.95	0.81	0.114076		245.9	50.75	-0.0321429	1.96249	447.3	49.35	-0.0447368	1.90835
169	27.24	0.0315789	1.05336	663.6	1.33	-0.226316	0.0514308		248.7	50.66	0.123333	1.95901	443.5	49.52	-0.0944444	1.91493
170.9	27.3	0.26875	1.05568	661.7	1.76	0.342105	0.0680588		251.7	51.03	-0.196774	1.97332	439.9	49.86	0.131429	1.92807
172.5	27.73	-0.547059	1.07231	659.8	1.11	-0.612	0.0429234		254.8	50.42	-0.162963	1.94973	436.4	49.4	-0.003125	1.91029
174.2	26.8	0.4375	1.03635	657.3	2.64	-0.0631579	0.102088		257.5	49.98	0.309677	1.93271	433.2	49.41	0.146875	1.91067
175.8	27.5	-0.236842	1.06342	655.4	2.76	0.168182	0.106729		260.6	50.94	-0.0266667	1.96984	430	48.94	-0.075	1.8925
177.7	27.05	0.33125	1.04602	653.2	2.39	0.1	0.0924207		263.6	50.86	0.253571	1.96674	426.4	49.21	0.2875	1.90294
179.3	27.58	0.0684211	1.06651	651.2	2.19	-0.152632	0.0846868		266.4	51.57	-0.103226	1.9942	423.2	48.29	-0.259375	1.86736
181.2	27.71	-0.1625	1.07154	649.3	2.48	-0.0272727	0.095901		269.5	51.25	0.0366667	1.98183	420	49.12	0.0714286	1.89946
182.8	27.45	-0.08125	1.06148	647.1	2.54	-0.00909091	0.0982212		272.5	51.36	-0.0806452	1.98608	416.5	48.87	0.125	1.88979
184.4	27.32	0.43125	1.05646	644.9	2.56	-0.412	0.0989946		275.6	51.11	-0.106452	1.97641	413.3	48.47	-0.0586207	1.87432
186	28.01	-0.3	1.08314	642.4	3.59	0.922727	0.138824		278.7	50.78	-0.156667	1.96365	410.4	48.64	0.103448	1.8809
187.9	27.44	-0.0705882	1.0611	640.2	1.56	-0.290909	0.0603248		281.7	50.31	0.2	1.94548	407.5	48.34	-0.1	1.8693
189.6	27.32	0.173684	1.05646	638	2.2	-0.252632	0.0850735		284.8	50.93	0.0823529	1.96945	404.3	48.66	-0.217143	1.88167
191.5	27.65	0.16875	1.06922	636.1	2.68	0.0884615	0.103635		288.2	51.21	0.129032	1.98028	400.8	49.42	-0.003125	1.91106
193.1	27.92	-0.14375	1.07966	633.5	2.45	-0.309091	0.0947409		291.3	51.61	-0.0633333	1.99575	397.6	49.43	-0.242857	1.91145
194.7	27.69	0.170588	1.07077	631.3	3.13	-0.189286	0.121036		294.3	51.42	0.120588	1.9884	394.1	50.28	0.1375	1.94432
196.4	27.98	0.0125	1.08198	628.5	3.66	0.388	0.141531		297.7	51.83	0.00645161	2.00425	390.9	49.84	0.444737	1.9273
198	28	-0.0473684	1.08275	626	2.69	0.016	0.104022		300.8	51.85	0.0451613	2.00503	387.1	48.15	-0.2	1.86195
199.9	27.91	0.03125	1.07927	623.5	2.65	0.076	0.102475		303.9	51.99	-0.0870968	2.01044	384	48.77	0.096875	1.88592
201.5	27.96	-0.352941	1.08121	621	2.46	-0.25	0.0951276		307	51.72	0.151613	2	380.8	48.46	0.0514286	1.87394
203.2	27.36	-0.04375	1.058	618.8	3.01	0.394737	0.116396		310.1	52.19	-0.141176	2.01817	377.3	48.28	-0.00588235	1.86698
204.8	27.29	0.263158	1.0553	616.9	2.26	-0.276	0.0873937		313.5	51.71	-0.351613	1.99961	373.9	48.3	-0.196875	1.86775
206.7	27.79	0.0210526	1.07463	614.4	2.95	0.152632	0.114076		316.6	50.62	0.206452	1.95746	370.7	48.93	0.341176	1.89211
208.6	27.83	0.126316	1.07618	612.5	2.66	0.0363636	0.102862		319.7	51.26	0.194595	1.98221	367.3	47.77	-0.0457143	1.84725
210.5	28.07	-0.295455	1.08546	610.3	2.58	-0.084	0.099768		323.4	51.98	-0.335484	2.01005	363.8	47.93	-0.0322581	1.85344
212.7	27.42	0.0578947	1.06032	607.8	2.79	-0.028	0.107889		326.5	50.94	0.441935	1.96984	360.7	48.03	-0.409375	1.85731
214.6	27.53	0.331579	1.06458	605.3	2.86	-0.16	0.110596		329.6	52.31	-0.151613	2.02282	357.5	49.34	0.293548	1.90797
216.5	28.16	0.0473684	1.08894	602.8	3.26	0.65	0.126063		332.7	51.84	0.147059	2.00464	354.4	48.43	0.246875	1.87278
218.4	28.25	-0.33	1.09242	600.6	1.83	-0.0277778	0.0707657		336.1	52.34	-0.374194	2.02398	351.2	47.64	-0.251613	1.84223
220.4	27.59	0.163158	1.0669	598.8	1.88	-0.172727	0.0726991		339.2	51.18	0.60625	1.97912	348.1	48.42	0.29375	1.87239
222.3	27.9	-0.25625	1.07889	596.6	2.26	0.02	0.0873937		342.4	53.12	-0.173529	2.05414	344.9	47.48	-0.157143	1.83604
223.9	27.49	0.189474	1.06303	594.1	2.21	-0.34	0.0854602		345.8	52.53	-0.0735294	2.03132	342.1	47.92	0.0483871	1.85305
225.8	27.85	-0.129412	1.07695	591.6	3.06	-0.4	0.118329		349.2	52.28	-0.0470588	2.02166	339	47.77	-0.25625	1.84725
227.5	27.63	-0.121053	1.06845	588.8	4.18	-2.20417	0.16164		352.6	52.12	-0.00344828	2.01547	335.8	48.59	0.2	1.87896
229.4	27.4	0.329412	1.05955	586.4	9.47	-2.656	0.366203		355.5	52.11	-0.265517	2.01508	332.7	47.97	0.0387097	1.85499
231.1	27.96	-0.35	1.08121	583.9	16.11	-5.02632	0.62297		358.4	51.34	0.1	1.98531	329.6	47.85	-0.129032	1.85035
232.7	27.4	0.394118	1.05955	582	25.66	-3.54286	0.992266		361.5	51.65	-0.165625	1.99729	326.5	48.25	0.190323	1.86582
234.4	28.07	-0.28125	1.08546	579.9	33.1	-2.92105	1.27997		364.7	51.12	0.119355	1.9768	323.4	47.66	-0.0625	1.843
236	27.62	0.314286	1.06806	578	38.65	-2.87895	1.49459		367.8	51.49	-0.00625	1.99111	320.2	47.86	-0.0129032	1.85073
237.4	28.06	-0.03125	1.08507	576.1	44.12	-2.6	1.70611		371	51.47	0.0147059	1.99033	317.1	47.9	0.196774	1.85228
239	28.01	0.0214286	1.08314	574	49.58	-1.396	1.91725		374.4	51.52	0.0684211	1.99227	314	47.29	-0.141935	1.82869
240.4	28.04	-0.241176	1.0843	571.5	53.07	-0.220833	2.0522		378.2	51.78	-0.21875	2.00232	310.9	47.73	0.158065	1.84571
242.1	27.63	0.342105	1.06845	569.1	53.6	-0.676	2.0727		381.4	51.08	0.16129	1.97525	307.8	47.24	-0.0323529	1.82676
244	28.28	-0.236364	1.09358	566.6	55.29	0.516667	2.13805		384.5	51.58	-0.290625	1.99459	304.4	47.35	0.0766667	1.83101
246.2	27.76	0.105263	1.07347	564.8	54.36	-0.0315789	2.10209		387.7	50.65	0.0228571	1.95862	301.4	47.12	-0.109677	1.82212
248.1	27.96	-0.16	1.08121	562.9	54.42	-0.557143	2.10441		391.2	50.73	-0.0894737	1.96172	298.3	47.46	0.00882353	1.83527
250.1	27.64	0.363158	1.06883	560.8	55.59	0.292	2.14965		395	50.39	0.120588	1.94857	294.9	47.43	-0.0290323	1.83411
252	28.33	-0.0863636	1.09551	558.3	54.86	0.395238	2.12142		398.4	50.8	-0.318421	1.96442	291.8	47.52	-0.0606061	1.83759
254.2	28.14	0.0272727	1.08817	556.2	54.03	-0.0863636	2.08933		402.2	49.59	0.0657895	1.91763	288.5	47.72	0.0852941	1.84532
256.4	28.2	-0.234783	1.09049	554	54.22	0.238095	2.09667		406	49.84	-0.136842	1.9273	285.1	47.43	0.116129	1.83411
258.7	27.66	0.515789	1.06961	551.9	53.72	-0.00454545	2.07734		409.8	49.32	-0.0285714	1.90719	282	47.07	-0.113333	1.82019
260.6	28.64	-0.210526	1.1075	549.7	53.73	-0.3	2.07773		413.3	49.22	-0.128125	1.90333	279	47.41	0.180645	1.83333
262.5	28.24	0.0608696	1.09203	547.6	54.36	0.477273	2.10209		416.5	48.81	0.1	1.88747	275.9	46.85	-0.0806452	1.81168
264.8	28.38	0.110526	1.09745	545.4	53.31	-0.571429	2.06148		420	49.16	-0.00789474	1.90101	272.8	47.1	-0.31	1.82135
266.7	28.59	-0.294118	1.10557	543.3	54.51	0.629167	2.10789		423.8	49.13	0.0457143	1.89985	269.8	48.03	0.103226	1.85731
268.4	28.09	0.178947	1.08623	540.9	53	-0.16	2.0495		427.3	49.29	-0.214286	1.90603	266.7	47.71	0.193939	1.84493
270.3	28.43	0.0705882	1.09938	538.4	53.4	-0.2	2.06497		430.8	48.54	0.178788	1.87703	263.4	47.07	0.0129032	1.82019
272	28.55	-0.105882	1.10402	536.3	53.82	0	2.08121		434.1	49.13	-0.182857	1.89985	260.3	47.03	-0.323333	1.81864
273.7	28.37	-0.136842	1.09706	534.5	53.82	-0.2	2.08121		437.6	48.49	-0.084375	1.8751	257.3	48	0.412903	1.85615
275.6	28.11	0.405882	1.08701	532.4	54.24	0.0947368	2.09745		440.8	48.22	0.0111111	1.86466	254.2	46.72	-0.0777778	1.80665
277.3	28.8	-0.178947	1.11369	530.5	54.06	0.447619	2.09049		444.4	48.26	-0.0428571	1.8662	251.5	46.93	-0.216129	1.81477
279.2	28.46	0.286957	1.10054	528.4	53.12	0.0592593	2.05414		447.9	48.11	-0.131429	1.8604	248.4	47.6	0.114815	1.84068
281.5	29.12	-0.0684211	1.12606	525.7	52.96	0.272727	2.04795		451.4	47.65	-0.172222	1.84261	245.7	47.29	0.144	1.82869
283.4	28.99	0.08	1.12104	523.5	52.36	-0.320833	2.02475		455	47.03	0.3125	1.81864	243.2	46.93	-0.0645161	1.81477
285.4	29.15	-0.136842	1.12722	521.1	53.13	-0.0714286	2.05452		458.2	48.03	-0.255556	1.85731	240.1	47.13	-0.340741	1.82251
287.3	28.89	-0.28	1.11717	519	53.28	0.190476	2.06032		461.8	47.11	0.191667	1.82173	237.4	48.05	0.114286	1.85808
289.3	28.33	0.24	1.09551	516.9	52.88	0.3625	2.04486		465.4	47.8	-0.109375	1.84841	234.6	47.73	0.259259	1.84571
291.3	28.81	-0.13125	1.11408	514.5	52.01	-0.55	2.01121		468.6	47.45	0.0166667	1.83488	231.9	47.03	0.05	1.81864
292.9	28.6	0.0130435	1.10596	512.1	53.33	0.156	2.06226		472.2	47.51	0.222222	1.8372	228.9	46.88	-0.210714	1.81284
295.2	28.63	-0.321053	1.10712	509.6	52.94	0.0333333	2.04718		475.8	48.31	-0.0545455	1.86814	226.1	47.47	0.0133333	1.83565
297.1	28.02	0.13913	1.08353	507.2	52.86	0.1375	2.04408		479.1	48.13	-0.210526	1.86118	223.1	47.43	0.281481	1.83411
299.4	28.34	0.186364	1.0959	504.8	52.53	0.104762	2.03132		482.9	47.33	0.3	1.83024	220.4	46.67	-0.3	1.80472
301.6	28.75	0.0173913	1.11176	502.7	52.31	-0.266667	2.02282		486.5	48.41	-0.0787879	1.872	217.6	47.51	0.0148148	1.8372
303.9	28.79	-0.165	1.1133	500.9	52.79	0.0208333	2.04138		489.8	48.15	-0.223077	1.86195	214.9	47.47	0.253333	1.83565
305.9	28.46	0.00454545	1.10054	498.5	52.74	0.129167	2.03944		493.7	47.28	0.190476	1.82831	211.9	46.71	-0.0666667	1.80626
308.1	28.47	0.008	1.10093	496.1	52.43	0.1	2.02746		497.9	48.08	0.102778	1.85924	209.2	46.89	-0.142857	1.81323
310.6	28.49	-0.184615	1.1017	493.7	52.19	-0.0380952	2.01817		501.5	48.45	0.0727273	1.87355	206.4	47.29	0.0296296	1.82869
313.2	28.01	-0.154545	1.08314	491.6	52.27	0.161905	2.02127		504.8	48.69	-0.0636364	1.88283	203.7	47.21	0.196667	1.8256
315.4	27.67	0.255	1.06999	489.5	51.93	0.114286	2.00812		508.1	48.48	0.0513514	1.87471	200.7	46.62	-0.2	1.80278
317.4	28.18	-0.2	1.08971	487.4	51.69	-0.238095	1.99884		511.8	48.67	-0.252778	1.88206	198	47.16	-0.0566667	1.82367
319.4	27.78	0.252174	1.07425	485.3	52.19	0.0857143	2.01817		515.4	47.76	0.421212	1.84687	195	47.33	-0.288889	1.83024
321.7	28.36	-0.0681818	1.09667	483.2	52.01	0.333333	2.01121		518.7	49.15	-0.253846	1.90062	192.3	48.11	0.240741	1.8604
323.9	28.21	-0.075	1.09087	480.8	51.21	-0.243478	1.98028		522.6	48.16	0.0575	1.86234	189.6	47.46	0.143333	1.83527
325.9	28.06	0.025	1.08507	478.5	51.77	0.0904762	2.00193		526.6	48.39	-0.05	1.87123	186.6	47.03	0.0925926	1.81864
327.9	28.11	-0.3	1.08701	476.4	51.58	-0.133333	1.99459		530.2	48.21	0.194118	1.86427	183.9	46.78	-0.0466667	1.80897
329.9	27.51	0.46	1.06381	474.3	51.86	0.0142857	2.00541		533.6	48.87	-0.0194444	1.88979	180.9	46.92	0.166667	1.81439
331.9	28.43	0.0954545	1.09938	472.2	51.83	0.025	2.00425		537.2	48.8	0.210811	1.88708	178.2	46.47	-0.240741	1.79698
334.1	28.64	0.178261	1.1075	469.8	51.77	0.125	2.00193		540.9	49.58	0.223077	1.91725	175.5	47.12	0.0037037	1.82212
336.4	29.05	-0.12	1.12336	467.4	51.47	0.491304	1.99033		544.8	50.45	0.027027	1.95089	172.8	47.11	0.0407407	1.82173
338.4	28.81	0.00434783	1.11408	465.1	50.34	-0.320833	1.94664		548.5	50.55	0.148649	1.95476	170.1	47	-0.103704	1.81748
340.7	28.82	0.06	1.11446	462.7	51.11	0.2625	1.97641		552.2	51.1	-0.127778	1.97602	167.4	47.28	0.422222	1.82831
342.7	28.94	-0.263636	1.1191	460.3	50.48	-0.303846	1.95205		555.8	50.64	0.1675	1.95824	164.7	46.14	-0.279167	1.78422
344.9	28.36	0.113043	1.09667	457.7	51.27	0.0583333	1.9826		559.8	51.31	-0.418919	1.98415	162.3	46.81	-0.103704	1.81013
347.2	28.62	-0.22	1.10673	455.3	51.13	-0.0166667	1.97718		563.5	49.76	0.083871	1.92421	159.6	47.09	0.192593	1.82096
349.2	28.18	0.22	1.08971	452.9	51.17	-0.0652174	1.97873		566.6	50.02	-0.308108	1.93426	156.9	46.57	0.0296296	1.80085
351.2	28.62	0.1	1.10673	450.6	51.32	0.158333	1.98453		570.3	48.88	-1.01613	1.89018	154.2	46.49	-0.0583333	1.79776
353.2	28.82	-0.065	1.11446	448.2	50.94	-0.0888889	1.96984		573.4	45.73	-2.23784	1.76837	151.8	46.63	-0.180769	1.80317
355.2	28.69	0.045	1.10944	445.5	51.18	-0.02	1.97912		577.1	37.45	-4.11471	1.44818	149.2	47.1	0.274074	1.82135
357.2	28.78	-0.147059	1.11292	443.5	51.22	0.0285714	1.98067		580.5	23.46	-3.72059	0.907193	146.5	46.36	-0.274074	1.79273
358.9	28.53	0.133333	1.10325	441.4	51.16	0.4	1.97834		583.9	10.81	-1.75882	0.41802	143.8	47.1	-0.0458333	1.82135
360.7	28.77	-0.05	1.11253	439.4	50.36	-0.233333	1.94741		587.3	4.83	-0.1	0.186775	141.4	47.21	0.325926	1.8256
362.7	28.67	0.275	1.10866	437	50.92	-0.220833	1.96906		591	4.46	-0.645161	0.172467	138.7	46.33	-0.165385	1.79157
364.7	29.22	-0.125	1.12993	434.6	51.45	0.378261	1.98956		594.1	2.46	0.145946	0.0951276	136.1	46.76	0.303704	1.8082
366.7	28.97	-0.13	1.12026	432.3	50.58	0.0142857	1.95592		597.8	3	-0.385714	0.116009	133.4	45.94	-0.0592593	1.77649
368.7	28.71	0.258824	1.11021	430.2	50.55	-0.0217391	1.95476		601.3	1.65	0.224324	0.0638051	130.7	46.1	0.0758621	1.78268
370.4	29.15	-0.3	1.12722	427.9	50.6	0.169565	1.95669		605	2.48	-0.131707	0.095901	127.8	45.88	-0.2	1.77417
372.4	28.55	0.035	1.10402	425.6	50.21	-0.0555556	1.94161		609.1	1.94	0.121622	0.0750193	125.2	46.4	0.103704	1.79428
374.4	28.62	0.130769	1.10673	423.8	50.31	0.175	1.94548		612.8	2.39	-0.131429	0.0924207	122.5	46.12	0.104167	1.78345
377	28.96	-0.191304	1.11988	421.8	49.96	-0.180952	1.93194		616.3	1.93	-0.005	0.0746326	120.1	45.87	-0.1	1.77378
379.3	28.52	0.25	1.10286	419.7	50.34	0.17	1.94664		620.3	1.91	0.187805	0.0738592	117.5	46.13	0.0125	1.78384
381.1	28.97	0.405	1.12026	417.7	50	-0.225	1.93349		624.4	2.68	0.231579	0.103635	115.1	46.1	-0.183333	1.78268
383.1	29.78	-0.35	1.15159	415.3	50.54	0.385	1.95437		628.2	3.56	-0.352632	0.137664	112.7	46.54	-0.0125	1.79969
385.1	29.08	-0.31	1.12452	413.3	49.77	-0.483333	1.92459		632	2.22	0.027027	0.0858469	110.3	46.57	-0.0958333	1.80085
387.1	28.46	0.261111	1.10054	411.5	50.64	0.25	1.95824		635.7	2.32	-0.0642857	0.0897138	107.9	46.8	0.0619048	1.80974
388.9	28.93	0.0434783	1.11872	409.5	50.14	0.1	1.9389		639.9	2.05	0.183784	0.079273	105.8	46.67	0.2625	1.80472
391.2	29.03	0.278261	1.12258	407.5	49.94	-0.116667	1.93117		643.6	2.73	-0.462857	0.105568	103.4	46.04	-0.0619048	1.78036
393.5	29.67	-0.0782609	1.14733	405.1	50.22	-0.0565217	1.942		647.1	1.11	0.502857	0.0429234	101.3	46.17	0.1125	1.78538
395.8	29.49	-0.1625	1.14037	402.8	50.35	-0.335	1.94702		650.6	2.87	-0.428947	0.110982	98.9	45.9	-0.138095	1.77494
398.2	29.1	-0.065	1.12529	400.8	51.02	0.338889	1.97293		654.4	1.24	0.431429	0.0479505	96.8	46.19	-0.0857143	1.78616
400.2	28.97	0.16	1.12026	399	50.41	0.07	1.94934		657.9	2.75	-0.128947	0.106342	94.7	46.37	-0.0809524	1.79312
402.2	29.29	0.208696	1.13264	397	50.27	-0.0470588	1.94393		661.7	2.26	0.457143	0.0873937	92.6	46.54	0.0888889	1.79969
404.5	29.77	-0.385714	1.1512	395.3	50.35	-0.275	1.94702		665.2	3.86	-0.502381	0.149265	90.8	46.38	0.171429	1.7935
406.6	28.96	-0.130435	1.11988	392.9	51.01	0.247826	1.97254		669.4	1.75	0.4	0.0676721	88.7	46.02	0.0190476	1.77958
408.9	28.66	0.104348	1.10828	390.6	50.44	0.235	1.9505		673.2	3.27	-0.0547619	0.12645	86.6	45.98	0.0368421	1.77804
411.2	28.9	-0.0857143	1.11756	388.6	49.97	0.185	1.93233		677.4	3.04	-0.251429	0.117556	84.7	45.91	-0.152381	1.77533
413.3	28.72	0.294118	1.1106	386.6	49.6	-0.113043	1.91802		680.9	2.16	0.1	0.0835267	82.6	46.23	-0.0285714	1.7877
415	29.22	-0.514286	1.12993	384.3	49.86	-0.0428571	1.92807		684.4	2.51	-0.128205	0.0970611	80.5	46.29	0.122222	1.79002
417.1	28.14	0.405882	1.08817	382.2	49.95	-0.425	1.93155		688.3	2.01	-0.151429	0.0777262	78.7	46.07	-0.0611111	1.78152
418.8	28.83	0.145833	1.11485	380.2	50.8	0.595652	1.96442		691.8	1.48	-0.0666667	0.0572312	76.9	46.18	-0.119048	1.78577
421.2	29.18	0.186957	1.12838	377.9	49.43	-0.335	1.91145		695.4	1.24	0.08	0.0479505	74.8	46.43	0.136842	1.79544
423.5	29.61	-0.0333333	1.14501	375.9	50.1	0.0608696	1.93735		698.9	1.52	0.131034	0.058778	72.9	46.17	0.00555556	1.78538
425.6	29.54	0.03	1.1423	373.6	49.96	-0.09	1.93194		701.8	1.9	-0.36087	0.0734725	71.1	46.16	0.0533333	1.785
427.6	29.6	0.133333	1.14462	371.6	50.14	0.383333	1.9389		704.1	1.07	0.584615	0.0413766	69.6	46.08	-0.273684	1.7819
429.4	29.84	0.235294	1.15391	369.8	49.45	-0.264706	1.91222		705.4	1.83	2.43333	0.0707657	67.7	46.6	0.393333	1.80201
431.1	30.24	-0.42381	1.16937	368.1	49.9	-0.005	1.92962		706	3.29	0.00466006	0.127224	66.2	46.01	-0.10625	1.7792
433.2	29.35	0	1.13496	366.1	49.91	0.085	1.93001						64.6	46.18	0.15	1.78577
435.5	29.35	-0.0037037	1.13496	364.1	49.74	-0.125	1.92343						62.8	45.91	-0.21875	1.77533
438.2	29.34	0.217391	1.13457	362.1	49.99	0.23913	1.9331						61.2	46.26	0.15625	1.78886
440.5	29.84	-0.0541667	1.15391	359.8	49.44	0.1	1.91183						59.6	46.01	-0.206667	1.7792
442.9	29.71	-0.404348	1.14888	357.8	49.24	0.195	1.9041						58.1	46.32	0.047619	1.79118
445.2	28.78	0.538095	1.11292	355.8	48.85	-0.526087	1.88902						56	46.22	0.152381	1.78732
447.3	29.91	-0.2375	1.15661	353.5	50.06	0.0521739	1.93581						53.9	45.9	-0.165217	1.77494
449.7	29.34	0.0956522	1.13457	351.2	49.94	0.324	1.93117						51.6	46.28	0.133333	1.78964
452	29.56	-0.0571429	1.14308	348.7	49.13	-0.105	1.89985						49.5	46	-0.109524	1.77881
454.1	29.44	0.0208333	1.13844	346.7	49.34	-0.225	1.90797						47.4	46.23	0.00555556	1.7877
456.5	29.49	0.143478	1.14037	344.7	49.79	0.286957	1.92537						45.6	46.22	0.111111	1.78732
458.8	29.82	0.0285714	1.15313	342.4	49.13	-0.343478	1.89985						43.8	46.02	-0.0769231	1.77958
460.9	29.88	-0.0166667	1.15545	340.1	49.92	-0.0434783	1.93039						42.5	46.12	0	1.78345
463.3	29.84	0.166667	1.15391	337.8	50.02	0.065	1.93426						40.9	46.12	0	1.78345
465.7	30.24	0.117391	1.16937	335.8	49.89	-0.159091	1.92923						39.9	46.12	1.15589	1.78345
468	30.51	0.0333333	1.17981	333.6	50.24	-0.335	1.94277
470.4	30.59	0.3	1.18291	331.6	50.91	0.48	1.96868
472.8	31.31	-0.411111	1.21075	329.6	49.95	-0.211765	1.93155
474.6	30.57	0.0380952	1.18213	327.9	50.31	0.217647	1.94548
476.7	30.65	0	1.18523	326.2	49.94	-0.0294118	1.93117
478.8	30.65	0.0130435	1.18523	324.5	49.99	0.115	1.9331
481.1	30.68	0.0708333	1.18639	322.5	49.76	0.3	1.92421
483.5	30.85	0.120833	1.19296	320.5	49.16	-0.135294	1.90101
485.9	31.14	-0.328571	1.20418	318.8	49.39	-0.241176	1.9099
488	30.45	0.277778	1.17749	317.1	49.8	-0.0368421	1.92575
489.8	30.95	0.0285714	1.19683	315.2	49.87	0.165	1.92846
491.9	31.01	-0.352381	1.19915	313.2	49.54	-0.345	1.9157
494	30.27	0.128571	1.17053	311.2	50.23	0.163636	1.94238
496.1	30.54	-0.0333333	1.18097	309	49.87	0.145	1.92846
497.9	30.48	0.6	1.17865	307	49.58	0.205	1.91725
500	31.74	-0.519048	1.22738	305	49.17	-0.455	1.90139
502.1	30.65	0.429167	1.18523	303	50.08	-0.0545455	1.93658
504.5	31.68	-0.025	1.22506	300.8	50.2	-0.065	1.94122
506.9	31.62	0.1375	1.22274	298.8	50.33	0.152632	1.94625
509.3	31.95	-0.0363636	1.2355	296.9	50.04	0.055	1.93503
511.5	31.87	0.347619	1.23241	294.9	49.93	-0.0705882	1.93078
513.6	32.6	-0.266667	1.26063	293.2	50.05	0.389474	1.93542
516	31.96	-0.0833333	1.23589	291.3	49.31	-0.304348	1.90681
518.4	31.76	-0.0111111	1.22815	289	50.01	0.164706	1.93387
521.1	31.73	0.204167	1.22699	287.3	49.73	-0.0526316	1.92305
523.5	32.22	-0.15	1.24594	285.4	49.83	0.31	1.92691
526.3	31.8	0.0208333	1.2297	283.4	49.21	0.0842105	1.90294
528.7	31.85	-0.148148	1.23163	281.5	49.05	-0.525	1.89675
531.4	31.45	0.189286	1.21616	279.5	50.1	0.315789	1.93735
534.2	31.98	0.0740741	1.23666	277.6	49.5	-0.264706	1.91415
536.9	32.18	0.291667	1.24439	275.9	49.95	0.325	1.93155
539.3	32.88	0.0870968	1.27146	273.9	49.3	-0.375	1.90642
542.4	33.15	0.343333	1.2819	272.3	49.9	-0.0764706	1.92962
545.4	34.18	-0.125	1.32173	270.6	50.03	0.405882	1.93465
548.2	33.83	0.304167	1.3082	268.9	49.34	-0.5375	1.90797
550.6	34.56	-0.18	1.33643	267.3	50.2	0.235	1.94122
553.1	34.11	0.159259	1.31903	265.3	49.73	0.0842105	1.92305
555.8	34.54	0.254545	1.33565	263.4	49.57	-0.26	1.91686
558	35.1	-0.112	1.35731	260.9	50.22	-0.172727	1.942
560.5	34.82	0.261905	1.34648	258.7	50.6	0.478261	1.95669
562.6	35.37	-0.228	1.36775	256.4	49.5	-0.326316	1.91415
565.1	34.8	0.154167	1.34571	254.5	50.12	0.136842	1.93813
567.5	35.17	0.244	1.36002	252.6	49.86	-0.0294118	1.92807
570	35.78	-0.1625	1.3836	250.9	49.91	0	1.93001
572.4	35.39	-1.164	1.36852	249.2	49.91	-0.3	1.93001
574.9	32.48	-1.55909	1.25599	247.6	50.39	0.470588	1.94857
577.1	29.05	-2.57083	1.12336	245.9	49.59	-0.49375	1.91763
579.5	22.88	-2.675	0.884764	244.3	50.38	0.264706	1.94818
582.3	15.39	-2.33182	0.595128	242.6	49.93	0.0105263	1.93078
584.5	10.26	-1.33636	0.396752	240.7	49.91	0.231579	1.93001
586.7	7.32	-0.885714	0.283063	238.8	49.47	-0.405882	1.91299
588.8	5.46	-0.36	0.211137	237.1	50.16	0.625	1.93968
591.3	4.56	-0.592	0.176334	235.5	49.16	-0.676471	1.90101
593.8	3.08	0.189286	0.119103	233.8	50.31	0.54375	1.94548
596.6	3.61	-0.092	0.139598	232.2	49.44	0.185	1.91183
599.1	3.38	-0.521429	0.130704	230.2	49.07	-0.205263	1.89753
601.9	1.92	0.418182	0.0742459	228.3	49.46	-0.163158	1.91261
604.1	2.84	-0.140909	0.109822	226.4	49.77	0.123529	1.92459
606.3	2.53	0.395238	0.0978345	224.7	49.56	-0.35625	1.91647
608.4	3.36	-0.394737	0.12993	223.1	50.13	-0.289474	1.93852
610.3	2.61	0.213636	0.100928	221.2	50.68	0.6	1.95978
612.5	3.08	-0.372	0.119103	219.5	49.66	-0.131579	1.92034
615	2.15	0.264	0.08314	217.6	49.91	0.24375	1.93001
617.5	2.81	-0.204545	0.108662	216	49.52	0.121053	1.91493
619.7	2.36	0.247368	0.0912606	214.1	49.29	-0.0176471	1.90603
621.6	2.83	-0.0136364	0.109435	212.4	49.32	-0.29375	1.90719
623.8	2.8	-0.309091	0.108275	210.8	49.79	0.4375	1.92537
626	2.12	0.18	0.0819799	209.2	49.09	-0.165	1.8983
628.5	2.57	0.248	0.0993813	207.2	49.42	0.136842	1.91106
631	3.19	-0.131579	0.123357	205.3	49.16	-0.03125	1.90101
632.9	2.94	-0.05	0.113689	203.7	49.21	0.15625	1.90294
635.1	2.83	-0.422727	0.109435	202.1	48.96	-0.335294	1.89327
637.3	1.9	0.0192308	0.0734725	200.4	49.53	0.11875	1.91531
639.9	1.95	0.24	0.075406	198.8	49.34	0.0210526	1.90797
642.4	2.55	0.278947	0.0986079	196.9	49.3	0.142105	1.90642
644.3	3.08	-0.224	0.119103	195	49.03	-0.25	1.89598
646.8	2.52	-0.056	0.0974478	192.8	49.58	-0.105263	1.91725
649.3	2.38	0.0473684	0.092034	190.9	49.78	0.1375	1.92498
651.2	2.47	-0.234783	0.0955143	189.3	49.56	-0.147368	1.91647
653.5	1.93	0.268421	0.0746326	187.4	49.84	0.4	1.9273
655.4	2.44	0.227273	0.0943542	185.8	49.2	0.0105263	1.90255
657.6	2.94	-0.232	0.113689	183.9	49.18	0.126316	1.90178
660.1	2.36	0.15	0.0912606	182	48.94	-0.48125	1.8925
662.7	2.75	0.313636	0.106342	180.4	49.71	0.336842	1.92227
664.9	3.44	-0.831579	0.133024	178.5	49.07	-0.03125	1.89753
666.8	1.86	0.342308	0.0719258	176.9	49.12	-0.0736842	1.89946
669.4	2.75	-0.168966	0.106342	175	49.26	-0.0352941	1.90487
672.3	2.26	-0.00714286	0.0873937	173.3	49.32	0.183333	1.90719
675.1	2.24	0.35	0.0866203	171.5	48.99	-0.0473684	1.89443
678.3	3.36	-0.423077	0.12993	169.6	49.08	0.125	1.89791
680.9	2.26	0.195652	0.0873937	168	48.88	0.152941	1.89018
683.2	2.71	-0.404545	0.104795	166.3	48.62	-0.2625	1.88012
685.4	1.82	0.13913	0.070379	164.7	49.04	0.25	1.89637
687.7	2.14	-0.052	0.0827533	163.1	48.64	-0.105263	1.8809
690.2	2.01	0.42069	0.0777262	161.2	48.84	-0.03125	1.88863
693.1	3.23	-0.3	0.124903	159.6	48.89	0.01875	1.89056
695.4	2.54	-0.103448	0.0982212	158	48.86	0.3	1.8894
698.3	2.24	-0.126923	0.0866203	156.4	48.38	-0.392308	1.87084
700.9	1.91	0.205263	0.0738592	155.1	48.89	0.111765	1.89056
702.8	2.3	0.2875	0.0889404	153.4	48.7	-0.33125	1.88322
704.4	2.76	-0.369231	0.106729	151.8	49.23	0.43125	1.90371
705.7	2.28	-1.08	0.0881671	150.2	48.54	-0.05625	1.87703
706.7	1.2	1.35	0.0464037	148.6	48.63	-0.08125	1.88051
707.3	2.01	1.31429	0.0777262	147	48.76	0.025	1.88554
708	2.93	-0.0166667	0.113302	145.4	48.72	-0.210526	1.88399
708.6	2.92	-0.271429	0.112916	143.5	49.12	0.1125	1.89946
709.3	2.73	-1.96667	0.105568	141.9	48.94	0.0888889	1.8925
709.6	2.14	3.36667	0.0827533	140.1	48.78	-0.0736842	1.88631
709.9	3.15	#DIV/0!	0.12181	138.2	48.92	0.33125	1.89172
709.9	2.55	-0.25	0.0986079	136.6	48.39	-0.1875	1.87123
710.3	2.45	-4.43333	0.0947409	135	48.69	-0.28125	1.88283
710.6	1.12	#DIV/0!	0.0433101	133.4	49.14	0.357895	1.90023
710.6	0.72	#DIV/0!	0.0278422	131.5	48.46	0.188889	1.87394
710.6	2.92	-0.0666667	0.112916	129.7	48.12	-0.0842105	1.86079
710.9	2.9	-3.76667	0.112142	127.8	48.28	0.257895	1.86698
711.2	1.77	1.175	0.0684455	125.9	47.79	-0.0277778	1.84803
711.6	2.24	#DIV/0!	0.0866203	124.1	47.84	-0.194737	1.84996
711.6	2.94	#DIV/0!	0.113689	122.2	48.21	0.2125	1.86427
711.6	2.84	-2.93333	0.109822	120.6	47.87	-0.0166667	1.85112
711.9	1.96	#DIV/0!	0.0757927	118.8	47.9	-0.0526316	1.85228
711.9	2.56	#DIV/0!	0.0989946	116.9	48	-0.1875	1.85615
711.9	2.96	#DIV/0!	0.114462	115.3	48.3	0.372222	1.86775
711.9	2.86	0.00401742	0.110596	113.5	47.63	-0.28125	1.84184
				111.9	48.08	-0.284615	1.85924
				110.6	48.45	0.05	1.87355
				109	48.37	-0.107692	1.87046
				107.7	48.51	-0.05	1.87587
				106.1	48.59	0.15625	1.87896
				104.5	48.34	0.384615	1.8693
				103.2	47.84	-0.08125	1.84996
				101.6	47.97	-0.3	1.85499
				100.3	48.36	0.29375	1.87007
				98.7	47.89	-0.38125	1.85189
				97.1	48.5	0.353846	1.87548
				95.8	48.04	0.130769	1.8577
				94.5	47.87	-0.207692	1.85112
				93.2	48.14	0.1	1.86156
				92.1	48.03	-0.269231	1.85731
				90.8	48.38	0.215385	1.87084
				89.5	48.1	0.0181818	1.86002
				88.4	48.08	-0.307692	1.85924
				87.1	48.48	0.48	1.87471
				86.1	48	0.0642857	1.85615
				84.7	47.91	0.0615385	1.85267
				83.4	47.83	0.1	1.84957
				82.4	47.73	-0.0375	1.84571
				80.8	47.79	-0.29	1.84803
				79.8	48.08	0.0785714	1.85924
				78.4	47.97	-0.230769	1.85499
				77.1	48.27	0.192308	1.86659
				75.8	48.02	0.3	1.85692
				74.5	47.63	-0.561538	1.84184
				73.2	48.36	0.69	1.87007
				72.2	47.67	-0.223077	1.84339
				70.9	47.96	-0.0153846	1.8546
				69.6	47.98	0.0818182	1.85538
				68.5	47.89	0.176923	1.85189
				67.2	47.66	-0.45	1.843
				66.2	48.11	0.253846	1.8604
				64.9	47.78	-0.2	1.84764
				63.8	48	0.1125	1.85615
				63	47.91	-0.23	1.85267
				62	48.14	0.336364	1.86156
				60.9	47.77	0.26	1.84725
				59.9	47.51	-0.49	1.8372
				58.9	48	0.0947368	1.85615
				57	47.82	-0.05	1.84919
				55	47.92	0.0125	1.85305
				52.6	47.89	-0.00434783	1.85189
				50.3	47.9	0.0380952	1.85228
				48.2	47.82	-0.00869565	1.84919
				45.9	47.84	0.0631579	1.84996
				44	47.72	-0.133333	1.84532
				42.5	47.92	0.0625	1.85305
				40.9	47.82	0	1.84919
				39.6	47.82	1.20758	1.84919

## Sheet: T. Steps Reversible
450 run heating				450 run cooling					520 run heating				520 run cooling					540 run heating				540 run cooling
TEMP	CSUSC	1st der	knorm	TEMP	CSUSC	1st der	knorm		TEMP	CSUSC	1st der	knorm	TEMP	CSUSC	1st der	knorm		TEMP	CSUSC	1st der	knorm	TEMP	CSUSC	1st der	knorm
23.1	32.7	-0.666667	1	460.6	37.68	0.211111	1.15229		24.4	33.7	#DIV/0!	1	530.2	39.61	-1.46667	1.17537		25.4	34.6	#DIV/0!	1	548.8	42.17	0.577778	1.21879
23.4	32.5	-0.0555556	0.993884	459.7	37.49	0.45	1.14648		24.4	33.6	0.0769231	0.997033	529.9	40.05	0.133333	1.18843		25.4	34.5	0.153846	0.99711	547.9	41.65	-0.0266667	1.20376
25.2	32.4	0.203571	0.990826	458.5	36.95	-0.592857	1.12997		25.7	33.7	0.0304348	1	529	39.93	-0.655556	1.18487		26.7	34.7	-0.156522	1.00289	546.4	41.69	0.1	1.20491
28	32.97	0	1.00826	457.1	37.78	0.457143	1.15535		28	33.77	-0.103571	1.00208	528.1	40.52	-0.116667	1.20237		29	34.34	-0.280645	0.992486	544.8	41.53	0.00555556	1.20029
31.6	32.97	-0.179412	1.00826	455	36.82	-0.261905	1.12599		30.8	33.48	0.0193548	0.993472	526.9	40.66	0.333333	1.20653		32.1	33.47	0.351613	0.967341	543	41.52	0.4	1.2
35	32.36	0.112121	0.989602	452.9	37.37	-0.1	1.14281		33.9	33.54	-0.015625	0.995252	525.1	40.06	0.0863636	1.18872		35.2	34.56	-0.0352941	0.998844	541.2	40.8	-0.52	1.17919
38.3	32.73	0.0382353	1.00092	450.3	37.63	0.283333	1.15076		37.1	33.49	0.0258065	0.993769	522.9	39.87	0.214286	1.18309		38.6	34.44	-0.122581	0.995376	538.7	42.1	0.214815	1.21676
41.7	32.86	0.0193548	1.00489	447.9	36.95	-0.0037037	1.12997		40.2	33.57	0.0193548	0.996142	520.8	39.42	-0.275	1.16973		41.7	34.06	0.0205882	0.984393	536	41.52	-0.0458333	1.2
44.8	32.92	-0.0806452	1.00673	445.2	36.96	-0.0103448	1.13028		43.3	33.63	0.0225806	0.997923	518.4	40.08	-0.216667	1.18932		45.1	34.13	-0.0354839	0.986416	533.6	41.63	0.132143	1.20318
47.9	32.67	-0.0172414	0.999083	442.3	36.99	-0.0931034	1.13119		46.4	33.7	0.00714286	1	516	40.6	0.4	1.20475		48.2	34.02	0.0689655	0.983237	530.8	41.26	-0.0222222	1.19249
50.8	32.62	0.126923	0.997554	439.4	37.26	0.12	1.13945		49.2	33.72	-0.196154	1.00059	513.3	39.52	-0.7125	1.1727		51.1	34.22	-0.0571429	0.989017	528.1	41.32	0.355556	1.19422
53.4	32.95	0.0461538	1.00765	436.4	36.9	-0.0115385	1.12844		51.8	33.21	0.138462	0.98546	510.9	41.23	0.472	1.22344		53.9	34.06	0.0807692	0.984393	525.4	40.36	-0.182143	1.16647
56	33.07	0.0576923	1.01131	433.8	36.93	0.206061	1.12936		54.4	33.57	-0.157692	0.996142	508.4	40.05	0.0592593	1.18843		56.5	34.27	0.0269231	0.990462	522.6	40.87	-0.114815	1.18121
58.6	33.22	-0.313043	1.0159	430.5	36.25	-0.0862069	1.10856		57	33.16	0.204167	0.983976	505.7	39.89	0.226667	1.18368		59.1	34.34	0.0625	0.992486	519.9	41.18	0	1.19017
60.9	32.5	0.1625	0.993884	427.6	36.5	0.11875	1.11621		59.4	33.65	-0.0695652	0.998516	502.7	39.21	-0.144444	1.1635		61.5	34.49	-0.0347826	0.996821	517.2	41.18	0.211111	1.19017
63.3	32.89	-0.121739	1.00581	424.4	36.12	-0.0448276	1.10459		61.7	33.49	0.0916667	0.993769	500	39.6	-0.233333	1.17507		63.8	34.41	-0.05	0.994509	514.5	40.61	-0.0814815	1.1737
65.6	32.61	0.170833	0.997248	421.5	36.25	-0.0514286	1.10856		64.1	33.71	-0.0956522	1.0003	497.6	40.16	0.0555556	1.19169		66.2	34.29	-0.0269231	0.99104	511.8	40.83	0.278571	1.18006
68	33.02	-0.0173913	1.00979	418	36.43	0.0277778	1.11407		66.4	33.49	-0.154167	0.993769	494.9	40.01	0.343333	1.18724		68.8	34.22	0.104348	0.989017	509	40.05	-0.21	1.15751
70.3	32.98	-0.104762	1.00856	414.4	36.33	0.0257143	1.11101		68.8	33.12	-0.026087	0.982789	491.9	38.98	-0.146667	1.15668		71.1	34.46	-0.0458333	0.995954	506	40.68	-0.0133333	1.17572
72.4	32.76	-0.104762	1.00183	410.9	36.24	0.264706	1.10826		71.1	33.06	-0.052381	0.981009	488.9	39.42	-0.0222222	1.16973		73.5	34.35	-0.00434783	0.992775	503	40.72	0.0939394	1.17688
74.5	32.54	0.0958333	0.995107	407.5	35.34	-0.203333	1.08073		73.2	32.95	0.245833	0.977745	486.2	39.48	0.0259259	1.17151		75.8	34.34	-0.0333333	0.992486	499.7	40.41	-0.11	1.16792
76.9	32.77	0.0380952	1.00214	404.5	35.95	-0.164706	1.09939		75.6	33.54	0.0190476	0.995252	483.5	39.41	0.376667	1.16944		77.9	34.27	-0.295833	0.990462	496.7	40.74	0.290909	1.17746
79	32.85	0.17619	1.00459	401.1	36.51	0.08	1.11651		77.7	33.58	-0.00434783	0.996439	480.5	38.28	-0.1	1.13591		80.3	33.56	0.326087	0.969942	493.4	39.78	0.153333	1.14971
81.1	33.22	-0.109524	1.0159	397.6	36.23	-0.2625	1.10795		80	33.57	-0.119048	0.996142	477.6	38.57	-0.0575758	1.14451		82.6	34.31	0.104167	0.991618	490.4	39.32	-0.0181818	1.13642
83.2	32.99	0.138095	1.00887	394.4	37.07	0.134375	1.13364		82.1	33.32	0.0833333	0.988724	474.3	38.76	0.273333	1.15015		85	34.56	-0.270833	0.998844	487.1	39.38	0.0472222	1.13815
85.3	33.28	-0.165217	1.01774	391.2	36.64	0.154286	1.12049		84.5	33.52	0.121739	0.994659	471.3	37.94	-0.227273	1.12582		87.4	33.91	0.108696	0.980058	483.5	39.21	0.0742857	1.13324
87.6	32.9	0.158333	1.00612	387.7	36.1	0.0125	1.10398		86.8	33.8	-0.133333	1.00297	468	38.69	-0.01875	1.14807		89.7	34.16	0.0583333	0.987283	480	38.95	-0.00833333	1.12572
90	33.28	0.0541667	1.01774	384.5	36.06	0.0807692	1.10275		89.5	33.44	-0.134783	0.992285	464.8	38.75	-0.0733333	1.14985		92.1	34.3	-0.0166667	0.991329	476.4	38.98	-0.0357143	1.12659
92.4	33.41	-0.0130435	1.02171	381.9	35.85	-0.239286	1.09633		91.8	33.13	0.258333	0.983086	461.8	38.97	0.31	1.15638		94.5	34.26	0.0952381	0.990173	472.2	39.13	-0.0435897	1.13092
94.7	33.38	-0.216667	1.0208	379.1	36.52	0.213793	1.11682		94.2	33.75	-0.1625	1.00148	458.8	38.04	-0.15625	1.12878		96.6	34.46	-0.0434783	0.995954	468.3	39.3	-0.226316	1.13584
97.1	32.86	0.238095	1.00489	376.2	35.9	0.140625	1.09786		96.6	33.36	-0.185714	0.989911	455.6	38.54	0.0111111	1.14362		98.9	34.36	-0.0875	0.993064	464.5	40.16	0.216667	1.16069
99.2	33.36	0.00833333	1.02018	373	35.45	-0.0625	1.0841		98.7	32.97	0.320833	0.978338	452	38.5	0.109375	1.14243		101.3	34.15	0.166667	0.986994	460.9	39.38	0.2	1.13815
101.6	33.38	-0.075	1.0208	369.8	35.65	-0.0580645	1.09021		101.1	33.74	0.0347826	1.00119	448.8	38.15	-0.00909091	1.13205		104	34.6	-0.26087	1	457.4	38.68	-0.157576	1.11792
104	33.2	0.130435	1.01529	366.7	35.83	0.278125	1.09572		103.4	33.82	-0.0958333	1.00356	445.5	38.18	0.121875	1.13294		106.3	34	0.316667	0.982659	454.1	39.2	-0.00571429	1.13295
106.3	33.5	0.103704	1.02446	363.5	34.94	-0.129032	1.0685		105.8	33.59	0.0791667	0.996736	442.3	37.79	-0.021875	1.12136		108.7	34.76	0.1	1.00462	450.6	39.22	-0.160606	1.13353
109	33.78	-0.215385	1.03303	360.4	35.34	0.1125	1.08073		108.2	33.78	0.120833	1.00237	439.1	37.86	-0.0363636	1.12344		111.1	35	-0.430769	1.01156	447.3	39.75	0.234286	1.14884
111.6	33.22	0.191667	1.0159	357.2	34.98	-0.154839	1.06972		110.6	34.07	-0.247826	1.01098	435.8	37.98	0.131034	1.127		113.7	33.88	0.340741	0.979191	443.8	38.93	0.075	1.12514
114	33.68	-0.0333333	1.02997	354.1	35.46	0.0413793	1.0844		112.9	33.5	0.12963	0.994065	432.9	37.6	0.115625	1.11573		116.4	34.8	-0.279167	1.00578	440.2	38.66	0.0428571	1.11734
116.7	33.59	-0.126087	1.02722	351.2	35.34	-0.0529412	1.08073		115.6	33.85	0	1.00445	429.7	37.23	-0.216667	1.10475		118.8	34.13	0.195833	0.986416	436.7	38.51	0	1.11301
119	33.3	-0.0037037	1.01835	347.8	35.52	0.0419355	1.08624		118	33.85	0.0576923	1.00445	426.1	38.01	0.38125	1.12789		121.2	34.6	-0.15	1	433.2	38.51	0.0866667	1.11301
121.7	33.29	-0.0958333	1.01804	344.7	35.39	0.0875	1.08226		120.6	34	-0.233333	1.0089	422.9	36.79	-0.131429	1.09169		123.8	34.21	-0.158333	0.988728	430.2	38.25	0.04375	1.10549
124.1	33.06	0.15	1.01101	341.5	35.11	-0.0588235	1.0737		123	33.44	-0.0416667	0.992285	419.4	37.25	0.121875	1.10534		126.2	33.83	0.286207	0.977746	427	38.11	0.00285714	1.10145
126.5	33.42	-0.176923	1.02202	338.1	35.31	0.109677	1.07982		125.4	33.34	0.133333	0.989318	416.2	36.86	-0.090625	1.09377		129.1	34.66	-0.311111	1.00173	423.5	38.1	0.121875	1.10116
129.1	32.96	0.266667	1.00795	335	34.97	-0.0411765	1.06942		128.1	33.7	-0.0916667	1	413	37.15	0.065625	1.10237		131.8	33.82	0.237037	0.977457	420.3	37.71	-0.021875	1.08988
131.5	33.6	-0.196296	1.02752	331.6	35.11	-0.00344828	1.0737		130.5	33.48	-0.0884615	0.993472	409.8	36.94	-0.04	1.09614		134.5	34.46	-0.15	0.995954	417.1	37.78	0.0542857	1.09191
134.2	33.07	0.1	1.01131	328.7	35.12	0	1.07401		133.1	33.25	0.0791667	0.986647	406.3	37.08	0.046875	1.1003		136.9	34.1	0.215385	0.985549	413.6	37.59	-0.203125	1.08642
136.6	33.31	0.120833	1.01865	325.6	35.12	0.0214286	1.07401		135.5	33.44	0.12963	0.992285	403.1	36.93	-0.2	1.09585		139.5	34.66	-0.0814815	1.00173	410.4	38.24	0.184375	1.1052
139	33.6	0.133333	1.02752	322.8	35.06	0.0580645	1.07217		138.2	33.79	0.155556	1.00267	399.9	37.57	0.275	1.11484		142.2	34.44	0.108333	0.995376	407.2	37.65	-0.071875	1.08815
141.4	33.92	-0.037037	1.03731	319.7	34.88	0.103226	1.06667		140.9	34.21	-0.116667	1.01513	396.7	36.69	-0.0689655	1.08872		144.6	34.7	-0.0703704	1.00289	404	37.88	-0.0125	1.0948
144.1	33.82	-0.145833	1.03425	316.6	34.56	-0.106897	1.05688		143.3	33.93	-0.0208333	1.00682	393.8	36.89	0.0172414	1.09466		147.3	34.51	0.0185185	0.997399	400.8	37.92	-0.0371429	1.09595
146.5	33.47	0.3	1.02355	313.7	34.87	0.209677	1.06636		145.7	33.88	0.137037	1.00534	390.9	36.84	0.00689655	1.09318		150	34.56	-0.238462	0.998844	397.3	38.05	0.053125	1.09971
149.2	34.28	-0.05	1.04832	310.6	34.22	-0.364286	1.04648		148.4	34.25	-0.0208333	1.01632	388	36.82	0.0275862	1.09258		152.6	33.94	0.288889	0.980925	394.1	37.88	-0.1125	1.0948
151.8	34.15	-0.0458333	1.04434	307.8	35.24	0.122581	1.07768		150.8	34.2	-0.253846	1.01484	385.1	36.74	-0.253125	1.09021		155.3	34.72	0.125926	1.00347	390.9	38.24	0.282759	1.1052
154.2	34.04	0.148	1.04098	304.7	34.86	0.084	1.06606		153.4	33.54	-0.0111111	0.995252	381.9	37.55	0.403226	1.11424		158	35.06	-0.222222	1.01329	388	37.42	-0.134375	1.0815
156.7	34.41	-0.179167	1.05229	302.2	34.65	-0.248387	1.05963		156.1	33.51	0.174074	0.994362	378.8	36.3	-0.172414	1.07715		160.7	34.46	0.166667	0.995954	384.8	37.85	-0.193548	1.09393
159.1	33.98	-0.0555556	1.03914	299.1	35.42	0.222581	1.08318		158.8	33.98	-0.0148148	1.00831	375.9	36.8	-0.078125	1.09199		163.4	34.91	-0.229167	1.00896	381.7	38.45	0.49375	1.11127
161.8	33.83	0.1	1.03456	296	34.73	0.135714	1.06208		161.5	33.94	-0.174074	1.00712	372.7	37.05	0.270588	1.09941		165.8	34.36	0.108333	0.993064	378.5	36.87	-0.148276	1.06561
164.2	34.07	-0.0740741	1.0419	293.2	34.35	0.241935	1.05046		164.2	33.47	0.185185	0.993175	369.3	36.13	-0.162857	1.07211		168.2	34.62	-0.155556	1.00058	375.6	37.3	0.046875	1.07803
166.9	33.87	0.251852	1.03578	290.1	33.6	-0.413333	1.02752		166.9	33.97	0.1	1.00801	365.8	36.7	0.157143	1.08902		170.9	34.2	0.333333	0.988439	372.4	37.15	-0.0678571	1.0737
169.6	34.55	-0.351724	1.05657	287.1	34.84	0.25	1.06544		169.8	34.26	-0.455556	1.01662	363	36.26	0.0758621	1.07596		173.6	35.1	-0.32	1.01445	369.6	37.34	0.1625	1.07919
172.5	33.53	-0.0851852	1.02538	284.3	34.14	-0.360714	1.04404		172.5	33.03	0.248148	0.980119	360.1	36.04	-0.040625	1.06944		176.6	34.14	0.237037	0.986705	366.4	36.82	-0.144828	1.06416
175.2	33.3	0.22	1.01835	281.5	35.15	0.267742	1.07492		175.2	33.7	0.207407	1	356.9	36.17	-0.158065	1.07329		179.3	34.78	-0.0666667	1.0052	363.5	37.24	0.129032	1.0763
178.2	33.96	0.166667	1.03853	278.4	34.32	-0.0785714	1.04954		177.9	34.26	0.0555556	1.01662	353.8	36.66	0.13125	1.08783		182	34.6	-0.0333333	1	360.4	36.84	-0.0125	1.06474
180.9	34.41	-0.137037	1.05229	275.6	34.54	-0.0571429	1.05627		180.6	34.41	-0.285185	1.02107	350.6	36.24	-0.154839	1.07537		184.7	34.51	0.206667	0.997399	357.2	36.88	0.00645161	1.0659
183.6	34.04	0.236667	1.04098	272.8	34.7	-0.0821429	1.06116		183.3	33.64	0.104	0.99822	347.5	36.72	0.13871	1.08961		187.7	35.13	-0.259259	1.01532	354.1	36.86	-0.0228571	1.06532
186.6	34.75	-0.307407	1.06269	270	34.93	0.176667	1.0682		185.8	33.9	-0.0740741	1.00593	344.4	36.29	0.0235294	1.07685		190.4	34.43	0.440741	0.995087	350.6	36.94	-0.0258065	1.06763
189.3	33.92	0.153333	1.03731	267	34.4	0.0535714	1.05199		188.5	33.7	0.52963	1	341	36.21	-0.284375	1.07448		193.1	35.62	-0.0466667	1.02948	347.5	37.02	0.170968	1.06994
192.3	34.38	-0.03	1.05138	264.2	34.25	-0.0214286	1.0474		191.2	35.13	-0.376667	1.04243	337.8	37.12	0.245161	1.10148		196.1	35.48	-0.16	1.02543	344.4	36.49	0.0875	1.05462
195.3	34.29	-0.0633333	1.04862	261.4	34.31	0.0407407	1.04924		194.2	34	0.2	1.0089	334.7	36.36	0.016129	1.07893		199.1	35	-0.166667	1.01156	341.2	36.21	-0.193548	1.04653
198.3	34.1	-0.0766667	1.04281	258.7	34.2	-0.214286	1.04587		197.2	34.6	-0.233333	1.02671	331.6	36.31	-0.0677419	1.07745		201.8	34.55	0.146667	0.998555	338.1	36.81	-0.0193548	1.06387
201.3	33.87	0.0172414	1.03578	255.9	34.8	0.264516	1.06422		200.2	33.9	0.0533333	1.00593	328.5	36.52	0.25	1.08368		204.8	34.99	-0.0481481	1.01127	335	36.87	0.105882	1.06561
204.2	33.92	0.0571429	1.03731	252.8	33.98	-0.08	1.03914		203.2	34.06	0.0166667	1.01068	325.3	35.72	-0.0774194	1.05994		207.5	34.86	-0.259259	1.00751	331.6	36.51	-0.00322581	1.0552
207	34.08	0.062963	1.0422	249.8	34.22	0.00666667	1.04648		206.2	34.11	0.21	1.01217	322.2	35.96	0.119355	1.06706		210.2	34.16	0.128571	0.987283	328.5	36.52	0.125	1.05549
209.7	34.25	-0.0518519	1.0474	246.8	34.2	-0.0387097	1.04587		209.2	34.74	-0.18	1.03086	319.1	35.59	-0.0535714	1.05608		213	34.52	0.11	0.997688	325.3	36.12	-0.174194	1.04393
212.4	34.11	0.376667	1.04312	243.7	34.32	0.136667	1.04954		212.2	34.2	-0.186667	1.01484	316.3	35.74	-0.00714286	1.06053		216	34.85	0.106667	1.00723	322.2	36.66	-0.13871	1.05954
215.4	35.24	-0.357143	1.07768	240.7	33.91	0.0928571	1.037		215.2	33.64	0.0333333	0.99822	313.5	35.76	0.117241	1.06113		219	35.17	-0.173333	1.01647	319.1	37.09	0.196429	1.07197
218.2	34.24	-0.0592593	1.04709	237.9	33.65	-0.2125	1.02905		218.2	33.74	0.31	1.00119	310.6	35.42	-0.0741935	1.05104		222	34.65	-0.137037	1.00145	316.3	36.54	0.0645161	1.05607
220.9	34.08	0.3	1.0422	235.5	34.16	0.0357143	1.04465		221.2	34.67	-0.0266667	1.02878	307.5	35.65	0.103571	1.05786		224.7	34.28	0.375	0.990751	313.2	36.34	0.232258	1.05029
223.6	34.89	-0.145161	1.06697	232.7	34.06	0.17037	1.04159		224.2	34.59	-0.207407	1.02641	304.7	35.36	0.114286	1.04926		227.5	35.33	-0.166667	1.0211	310.1	35.62	-0.245161	1.02948
226.7	34.44	-0.12	1.05321	230	33.6	-0.207143	1.02752		226.9	34.03	0.0535714	1.00979	301.9	35.04	-0.319355	1.03976		230.5	34.83	0.139286	1.00665	307	36.38	0.229412	1.05145
229.7	34.08	0.084	1.0422	227.2	34.18	0.12	1.04526		229.7	34.18	-0.107407	1.01424	298.8	36.03	0.129032	1.06914		233.3	35.22	-0.163333	1.01792	303.6	35.6	0.164516	1.0289
232.2	34.29	-0.0037037	1.04862	224.2	33.82	-0.0518519	1.03425		232.4	33.89	0.142857	1.00564	295.7	35.63	-0.030303	1.05727		236.3	34.73	0.0296296	1.00376	300.5	35.09	-0.293548	1.01416
234.9	34.28	0.072	1.04832	221.5	33.96	0.185714	1.03853		235.2	34.29	-0.2	1.01751	292.4	35.73	-0.0903226	1.06024		239	34.81	0.15	1.00607	297.4	36	0.145455	1.04046
237.4	34.46	0.0703704	1.05382	218.7	33.44	0.0733333	1.02263		238.2	33.69	0.28	0.999703	289.3	36.01	0.0935484	1.06855		241.8	35.23	0.126667	1.01821	294.1	35.52	-0.122581	1.02659
240.1	34.65	-0.088	1.05963	215.7	33.22	-0.245833	1.0159		241.2	34.53	0.0193548	1.02463	286.2	35.72	0.103226	1.05994		244.8	35.61	-0.0535714	1.02919	291	35.9	0.216129	1.03757
242.6	34.43	0.164516	1.05291	213.3	33.81	0.00714286	1.03394		244.3	34.59	0.1	1.02641	283.1	35.4	0.0366667	1.05045		247.6	35.46	-0.106667	1.02486	287.9	35.23	-0.354839	1.01821
245.7	34.94	-0.0296296	1.0685	210.5	33.79	-0.0133333	1.03333		247	34.86	-0.103226	1.03442	280.1	35.29	-0.0714286	1.04718		250.6	35.14	-0.0642857	1.01561	284.8	36.33	0.216129	1.05
248.4	34.86	0.112	1.06606	207.5	33.83	0.0333333	1.03456		250.1	34.54	-0.00740741	1.02493	277.3	35.49	0.0612903	1.05312		253.4	34.96	0.0133333	1.0104	281.7	35.66	-0.02	1.03064
250.9	35.14	-0.353571	1.07462	204.8	33.74	-0.00740741	1.0318		252.8	34.52	0.0642857	1.02433	274.2	35.3	0.115152	1.04748		256.4	35	0.129032	1.01156	278.7	35.72	-0.0387097	1.03237
253.7	34.15	0.0185185	1.04434	202.1	33.76	-0.025	1.03242		255.6	34.7	-0.0129032	1.02967	270.9	34.92	-0.025	1.0362		259.5	35.4	-0.0866667	1.02312	275.6	35.84	0.141935	1.03584
256.4	34.2	0.179412	1.04587	199.3	33.83	0.00344828	1.03456		258.7	34.66	0.00666667	1.02849	268.1	34.99	-0.145161	1.03828		262.5	35.14	0.0323529	1.01561	272.5	35.4	-0.193939	1.02312
259.8	34.81	-0.02	1.06453	196.4	33.82	0.121429	1.03425		261.7	34.68	-0.16129	1.02908	265	35.44	0.0833333	1.05163		265.9	35.25	0.04	1.01879	269.2	36.04	0.232258	1.04162
262.8	34.75	0.354839	1.06269	193.6	33.48	-0.0740741	1.02385		264.8	34.18	0.353333	1.01424	262	35.19	-0.280645	1.04421		268.9	35.37	0.2	1.02225	266.1	35.32	-0.0925926	1.02081
265.9	35.85	-0.330303	1.09633	190.9	33.68	0.0958333	1.02997		267.8	35.24	-0.15	1.0457	258.9	36.06	0.2	1.07003		272.3	36.05	-0.122222	1.04191	263.4	35.57	-0.0535714	1.02803
269.2	34.76	0.0612903	1.063	188.5	33.45	-0.0555556	1.02294		270.6	34.82	0.016129	1.03323	255.6	35.4	-0.0533333	1.05045		275	35.72	-0.182143	1.03237	260.6	35.72	0.2	1.03237
272.3	34.95	0.0866667	1.06881	185.8	33.6	-0.244444	1.02752		273.7	34.87	-0.0222222	1.03472	252.6	35.56	-0.083871	1.05519		277.8	35.21	0.109677	1.01763	257.5	35.1	-0.127273	1.01445
275.3	35.21	-0.0387097	1.07676	183.1	34.26	0.0925926	1.04771		276.4	34.81	-0.116129	1.03294	249.5	35.82	0.22963	1.06291		280.9	35.55	0.0193548	1.02746	254.2	35.52	0.0333333	1.02659
278.4	35.09	-0.0548387	1.07309	180.4	34.01	0.144444	1.04006		279.5	34.45	0.103226	1.02226	246.8	35.2	-0.00714286	1.04451		284	35.61	-0.0142857	1.02919	251.2	35.42	0.0387097	1.0237
281.5	34.92	0.07	1.06789	177.7	33.62	-0.0888889	1.02813		282.6	34.77	0.135714	1.03175	244	35.22	-0.128	1.0451		286.8	35.57	0.20303	1.02803	248.1	35.3	0.225926	1.02023
284.5	35.13	0.116129	1.07431	175	33.86	0.103704	1.03547		285.4	35.15	-0.0451613	1.04303	241.5	35.54	0.133333	1.0546		290.1	36.24	-0.00882353	1.0474	245.4	34.69	-0.016	1.0026
287.6	35.49	-0.138235	1.08532	172.3	33.58	-0.128	1.02691		288.5	35.01	-0.285714	1.03887	238.5	35.14	0.0214286	1.04273		293.5	36.21	-0.0264706	1.04653	242.9	34.73	-0.25	1.00376
291	35.02	0.151515	1.07095	169.8	33.9	0.0413793	1.0367		291.3	34.21	0.403333	1.01513	235.7	35.08	-0.0777778	1.04095		296.9	36.12	0.221429	1.04393	240.1	35.43	0.0333333	1.02399
294.3	35.52	-0.0852941	1.08624	166.9	33.78	0.244444	1.03303		294.3	35.42	-0.0612903	1.05104	233	35.29	-0.135714	1.04718		299.7	36.74	-0.206061	1.06185	237.7	35.35	0	1.02168
297.7	35.23	-0.0823529	1.07737	164.2	33.12	-0.137037	1.01284		297.4	35.23	-0.229412	1.0454	230.2	35.67	0.340741	1.05846		303	36.06	-0.0290323	1.0422	235.2	35.35	0.107143	1.02168
301.1	34.95	0.109091	1.06881	161.5	33.49	-0.00740741	1.02416		300.8	34.45	0.303226	1.02226	227.5	34.75	0.0321429	1.03116		306.1	35.97	-0.0513514	1.0396	232.4	35.05	-0.0625	1.01301
304.4	35.31	0.0689655	1.07982	158.8	33.51	0.0125	1.02477		303.9	35.39	-0.141176	1.05015	224.7	34.66	0.0407407	1.02849		309.8	35.78	0.0774194	1.0341	230	35.2	-0.207143	1.01734
307.3	35.51	0.122581	1.08593	156.4	33.48	0.0666667	1.02385		307.3	34.91	-0.00645161	1.03591	222	34.55	-0.0666667	1.02522		312.9	36.02	-0.0529412	1.04104	227.2	35.78	0.6	1.0341
310.4	35.89	-0.348387	1.09755	153.7	33.3	-0.133333	1.01835		310.4	34.89	0.135484	1.03531	219	34.75	0.0148148	1.03116		316.3	35.84	-0.258824	1.03584	224.5	34.16	-0.389286	0.987283
313.5	34.81	-0.0612903	1.06453	151	33.66	-0.195833	1.02936		313.5	35.31	-0.0909091	1.04777	216.3	34.71	-0.0678571	1.02997		319.7	34.96	0.267647	1.0104	221.7	35.25	0.111111	1.01879
316.6	34.62	0.00882353	1.05872	148.6	34.13	0.283333	1.04373		316.8	35.01	-0.1125	1.03887	213.5	34.9	-0.0333333	1.03561		323.1	35.87	-0.0382353	1.03671	219	34.95	0.0518519	1.01012
320	34.65	0.155882	1.05963	146.2	33.45	-0.285185	1.02294		320	34.65	0.0676471	1.02819	210.8	34.99	0.237037	1.03828		326.5	35.74	0.0548387	1.03295	216.3	34.81	-0.103571	1.00607
323.4	35.18	0.083871	1.07584	143.5	34.22	0.179167	1.04648		323.4	34.88	0.083871	1.03501	208.1	34.35	-0.00357143	1.01929		329.6	35.91	0.102941	1.03786	213.5	35.1	0.225926	1.01445
326.5	35.44	-0.126471	1.08379	141.1	33.79	0.176923	1.03333		326.5	35.14	-0.203226	1.04273	205.3	34.36	-0.251852	1.01958		333	36.26	0.0258065	1.04798	210.8	34.49	-0.17037	0.996821
329.9	35.01	0.0821429	1.07064	138.5	33.33	0.1125	1.01927		329.6	34.51	0.432143	1.02404	202.6	35.04	0.262963	1.03976		336.1	36.34	0.00882353	1.05029	208.1	34.95	0.246429	1.01012
332.7	35.24	0.176471	1.07768	136.1	33.06	-0.0666667	1.01101		332.4	35.72	-0.1	1.05994	199.9	34.33	-0.207407	1.01869		339.5	36.37	-0.165625	1.05116	205.3	34.26	-0.325926	0.990173
336.1	35.84	-0.224138	1.09602	133.4	33.24	0.341667	1.01651		335.3	35.43	0.138235	1.05134	197.2	34.89	0.162963	1.03531		342.7	35.84	0.0935484	1.03584	202.6	35.14	0.151852	1.01561
339	35.19	0.317857	1.07615	131	32.42	-0.35	0.991437		338.7	35.9	0.0258065	1.06528	194.5	34.45	-0.246429	1.02226		345.8	36.13	0.0206897	1.04422	199.9	34.73	0.162963	1.00376
341.8	36.08	-0.106897	1.10336	128.6	33.26	0.1	1.01713		341.8	35.98	-0.00645161	1.06766	191.7	35.14	-0.0037037	1.04273		348.7	36.19	-0.0964286	1.04595	197.2	34.29	-0.22	0.99104
344.7	35.77	-0.271429	1.09388	125.9	32.99	-0.0923077	1.00887		344.9	35.96	-0.0192308	1.06706	189	35.15	0.0851852	1.04303		351.5	35.92	0.22069	1.03815	194.7	34.84	-0.103704	1.00694
347.5	35.01	0.155172	1.07064	123.3	33.23	0.0222222	1.01621		347.5	35.91	-0.130769	1.06558	186.3	34.92	0.240741	1.0362		354.4	36.56	0.00967742	1.05665	192	35.12	0.133333	1.01503
350.4	35.46	0.0516129	1.0844	120.6	33.17	0.0576923	1.01437		350.1	35.57	0.196429	1.05549	183.6	34.27	-0.240741	1.01691		357.5	36.59	-0.0375	1.05751	189.3	34.76	-0.062963	1.00462
353.5	35.62	0.144828	1.0893	118	33.02	0.118519	1.00979		352.9	36.12	-0.153125	1.07181	180.9	34.92	0.203704	1.0362		360.7	36.47	0.0918919	1.05405	186.6	34.93	0.166667	1.00954
356.4	36.04	-0.203226	1.10214	115.3	32.7	-0.207692	1		356.1	35.63	0.448387	1.05727	178.2	34.37	0.0185185	1.01988		364.4	36.81	0.0258065	1.06387	183.9	34.48	-0.0133333	0.996532
359.5	35.41	0.134286	1.08287	112.7	33.24	-0.179167	1.01651		359.2	37.02	-0.471429	1.09852	175.5	34.32	-0.181481	1.0184		367.5	36.89	-0.0342857	1.06618	180.9	34.52	0.0185185	0.997688
363	35.88	0.2	1.09725	110.3	33.67	-0.0153846	1.02966		362.7	35.37	0.240541	1.04955	172.8	34.81	0.151852	1.03294		371	36.77	0.0735294	1.06272	178.2	34.47	-0.283333	0.996243
366.4	36.56	-0.272973	1.11804	107.7	33.71	0.191667	1.03089		366.4	36.26	-0.0647059	1.07596	170.1	34.4	0.155556	1.02077		374.4	37.02	-0.0742857	1.06994	175.2	35.32	0.155556	1.02081
370.1	35.55	0.165714	1.08716	105.3	33.25	-0.120833	1.01682		369.8	36.04	-0.160526	1.06944	167.4	33.98	-0.133333	1.00831		377.9	36.76	-0.0514286	1.06243	172.5	34.9	0.148148	1.00867
373.6	36.13	-0.373529	1.10489	102.9	33.54	0.0666667	1.02569		373.6	35.43	0.0621622	1.05134	164.7	34.34	-0.0222222	1.01899		381.4	36.58	-0.16129	1.05723	169.8	34.5	0.192593	0.99711
377	34.86	0.315789	1.06606	100.5	33.38	0.238095	1.0208		377.3	35.66	0.342857	1.05816	162	34.4	-0.0740741	1.02077		384.5	36.08	0.146875	1.04277	167.1	33.98	0.1	0.982081
380.8	36.06	-0.0228571	1.10275	98.4	32.88	-0.180952	1.0055		380.8	36.86	0.00540541	1.09377	159.3	34.6	0.0125	1.02671		387.7	36.55	0.28	1.05636	164.7	33.74	0.125926	0.975145
384.3	35.98	0.187097	1.10031	96.3	33.26	-0.147619	1.01713		384.5	36.88	-0.0368421	1.09436	156.9	34.57	0.075	1.02582		391.2	37.53	-0.0428571	1.08468	162	33.4	-0.222222	0.965318
387.4	36.56	-0.0793103	1.11804	94.2	33.57	0.257143	1.02661		388.3	36.74	0.090625	1.09021	154.5	34.39	-0.0125	1.02047		394.7	37.38	-0.15	1.08035	159.3	34	-0.180769	0.982659
390.3	36.33	0.0482759	1.11101	92.1	33.03	-0.0285714	1.01009		391.5	37.03	-0.390625	1.09881	152.1	34.42	0.0888889	1.02136		397.9	36.9	0.071875	1.06647	156.7	34.47	-0.008	0.996243
393.2	36.47	-0.015625	1.11529	90	33.09	0.1	1.01193		394.7	35.78	0.225	1.06172	149.4	34.18	-0.075	1.01424		401.1	37.13	-0.0470588	1.07312	154.2	34.49	0.0576923	0.996821
396.4	36.42	0.162069	1.11376	87.9	32.88	-0.247619	1.0055		397.9	36.5	0.0647059	1.08309	147	34.36	0.0296296	1.01958		404.5	36.97	-0.2375	1.0685	151.6	34.34	-0.025	0.992486
399.3	36.89	-0.0657143	1.12813	85.8	33.4	0.0857143	1.02141		401.3	36.72	-0.078125	1.08961	144.3	34.28	-0.211538	1.01721		407.7	36.21	0.102632	1.04653	149.2	34.4	-0.024	0.99422
402.8	36.66	-0.0657143	1.1211	83.7	33.22	-0.133333	1.0159		404.5	36.47	-0.105714	1.0822	141.7	34.83	0.107407	1.03353		411.5	36.6	-0.2125	1.0578	146.7	34.46	-0.0884615	0.995954
406.3	36.43	-0.239474	1.11407	81.6	33.5	-0.0444444	1.02446		408	36.1	-0.09375	1.07122	139	34.54	0.211111	1.02493		414.7	35.92	0.142424	1.03815	144.1	34.69	0.177778	1.0026
410.1	35.52	0.371429	1.08624	79.8	33.58	0.247619	1.02691		411.2	35.8	0.0342857	1.06231	136.3	33.97	-0.0653846	1.00801		418	36.39	0.142857	1.05173	141.4	34.21	0.0296296	0.988728
413.6	36.82	-0.147368	1.12599	77.7	33.06	-0.0315789	1.01101		414.7	35.92	0.422857	1.06588	133.7	34.14	-0.0666667	1.01306		421.5	36.89	0.117143	1.06618	138.7	34.13	-0.037931	0.986416
417.4	36.26	0.189474	1.10887	75.8	33.12	0.0952381	1.01284		418.2	37.4	-0.0636364	1.10979	131	34.32	0.133333	1.0184		425	37.3	0.13125	1.07803	135.8	34.24	-0.0416667	0.989595
421.2	36.98	-0.254286	1.13089	73.7	32.92	-0.2	1.00673		421.5	37.19	-0.09375	1.10356	128.3	33.96	-0.0153846	1.00772		428.2	37.72	-0.0131579	1.09017	133.4	34.34	0.0518519	0.992486
424.7	36.09	0.194737	1.10367	71.9	33.28	0.0666667	1.01774		424.7	36.89	0.1625	1.09466	125.7	34	-0.0814815	1.0089		432	37.67	0.0514286	1.08873	130.7	34.2	0.0115385	0.988439
428.5	36.83	-0.0457143	1.1263	70.1	33.16	-0.0666667	1.01407		427.9	37.41	-0.053125	1.11009	123	34.22	-0.0517241	1.01543		435.5	37.85	-0.258974	1.09393	128.1	34.17	0.0931034	0.987572
432	36.67	0.36875	1.12141	68	33.3	-0.00555556	1.01835		431.1	37.24	-0.317143	1.10504	120.1	34.37	0.0538462	1.01988		439.4	36.84	0.191429	1.06474	125.2	33.9	0.140741	0.979769
435.2	37.85	-0.211111	1.15749	66.2	33.31	0.01875	1.01865		434.6	36.13	0.442424	1.07211	117.5	34.23	-0.0259259	1.01573		442.9	37.51	0.025	1.0841	122.5	33.52	-0.193103	0.968786
438.8	37.09	-0.22	1.13425	64.6	33.28	0.0944444	1.01774		437.9	37.59	-0.0628571	1.11543	114.8	34.3	-0.0166667	1.0178		446.1	37.59	-0.180556	1.08642	119.6	34.08	-0.00740741	0.984971
442.3	36.32	0.191429	1.1107	62.8	33.11	-0.09375	1.01254		441.4	37.37	-0.248485	1.1089	112.4	34.34	0.0208333	1.01899		449.7	36.94	0.0263158	1.06763	116.9	34.1	-0.0461538	0.985549
445.8	36.99	-0.0969697	1.13119	61.2	33.26	-0.25	1.01713		444.7	36.55	0.162857	1.08457	110	34.29	0.0192308	1.01751		453.5	37.04	0.222222	1.07052	114.3	34.22	-0.140741	0.989017
449.1	36.67	0.090625	1.12141	59.4	33.71	0.18125	1.03089		448.2	37.12	-0.271875	1.10148	107.4	34.24	-0.0416667	1.01602		457.1	37.84	-0.021875	1.09364	111.6	34.6	0.35	1
452.3	36.96	0.0181818	1.13028	57.8	33.42	0	1.02202		451.4	36.25	0.0777778	1.07567	105	34.34	-0.00833333	1.01899		460.3	37.77	-0.0384615	1.09162	109.2	33.76	0.0608696	0.975723
455.6	37.02	0.416667	1.13211	55.5	33.42	-0.0225806	1.02202		455	36.53	0.294286	1.08398	102.6	34.36	-0.00952381	1.01958		464.2	37.62	0.191429	1.08728	106.9	33.62	-0.155556	0.971676
458	38.02	-0.217647	1.16269	52.4	33.49	0.0310345	1.02416		458.5	37.56	-0.0533333	1.11454	100.5	34.38	0.134783	1.02018		467.7	38.29	-0.330556	1.10665	104.2	34.04	0.0380952	0.983815
459.7	37.65	0.0222222	1.15138	49.5	33.4	-0.0419355	1.02141		461.5	37.4	-0.193333	1.10979	98.2	34.07	0.0958333	1.01098		471.3	37.1	0.411111	1.07225	102.1	33.96	0.258333	0.981503
460.6	37.67	0.0333333	1.15199	46.4	33.53	-0.0346154	1.02538		464.5	36.82	0.553125	1.09258	95.8	33.84	-0.0190476	1.00415		474.9	38.58	-0.227778	1.11503	99.7	33.34	-0.252174	0.963584
460.9	37.68	0.0817531	1.15229	43.8	33.62	0.0769231	1.02813		467.7	38.59	-0.239394	1.1451	93.7	33.88	-0.166667	1.00534		478.5	37.76	0.147368	1.09133	97.4	33.92	0.0761905	0.980347
				41.2	33.42	-0.0434783	1.02202		471	37.8	0.346667	1.12166	91.6	34.23	-0.128571	1.01573		482.3	38.32	-0.161111	1.10751	95.3	33.76	-0.0105263	0.975723
				38.9	33.52	0.861697	1.02508		474	38.84	-0.00606061	1.15252	89.5	34.5	0.0571429	1.02374		485.9	37.74	0.221212	1.09075	93.4	33.78	-0.0190476	0.976301
									477.3	38.82	-0.26875	1.15193	87.4	34.38	0.366667	1.02018		489.2	38.47	0.130303	1.11185	91.3	33.82	-0.0428571	0.977457
									480.5	37.96	0.151515	1.12641	85.3	33.61	-0.438095	0.997329		492.5	38.9	-0.0444444	1.12428	89.2	33.91	0.0619048	0.980058
									483.8	38.46	0.0333333	1.14125	83.2	34.53	0.0157895	1.02463		496.1	38.74	-0.333333	1.11965	87.1	33.78	-0.0142857	0.976301
									487.4	38.58	-0.213333	1.14481	81.3	34.5	0.295238	1.02374		499.7	37.54	0.161111	1.08497	85	33.81	-0.177778	0.977168
									490.4	37.94	0.258333	1.12582	79.2	33.88	-0.211111	1.00534		503.3	38.12	0.361111	1.10173	83.2	34.13	0.204762	0.986416
									494	38.87	0.111111	1.15341	77.4	34.26	0.104762	1.01662		506.9	39.42	0.254054	1.13931	81.1	33.7	0.0631579	0.973988
									497.6	39.27	-0.127273	1.16528	75.3	34.04	-0.122222	1.01009		510.6	40.36	-0.272727	1.16647	79.2	33.58	-0.0904762	0.97052
									500.9	38.85	-0.2	1.15282	73.5	34.26	-0.047619	1.01662		513.9	39.46	0.0611111	1.14046	77.1	33.77	0.127778	0.976012
									503.9	38.25	0.3	1.13501	71.4	34.36	-0.0111111	1.01958		517.5	39.68	-0.125	1.14682	75.3	33.54	-0.288889	0.969364
									507.2	39.24	0.270588	1.16439	69.6	34.38	-0.115789	1.02018		521.1	39.23	0.17027	1.13382	73.5	34.06	0.047619	0.984393
									510.6	40.16	-0.151515	1.19169	67.7	34.6	0.222222	1.02671		524.8	39.86	0.166667	1.15202	71.4	33.96	-0.0666667	0.981503
									513.9	39.66	0	1.17685	65.9	34.2	-0.1125	1.01484		528.4	40.46	0.166667	1.16936	69.6	34.08	0.0947368	0.984971
									517.2	39.66	-0.136364	1.17685	64.3	34.38	0.205556	1.02018		532	41.06	-0.00540541	1.18671	67.7	33.9	0.111111	0.979769
									520.5	39.21	0.0852941	1.1635	62.5	34.01	-0.1	1.0092		535.7	41.04	-0.0181818	1.18613	65.9	33.7	-0.2375	0.973988
									523.9	39.5	0.32963	1.17211	60.9	34.17	-0.0266667	1.01395		539	40.98	0.111765	1.18439	64.3	34.08	0.15	0.984971
									526.6	40.39	-0.572222	1.19852	59.4	34.21	-0.00555556	1.01513		542.4	41.36	0.0733333	1.19538	62.5	33.81	-0.1	0.977168
									528.4	39.36	0.725	1.16795	57.6	34.22	-0.0416667	1.01543		545.4	41.58	0.554545	1.20173	60.9	33.97	0.255556	0.981792
									529.6	40.23	-1.2	1.19377	55.2	34.32	0.0115385	1.0184		547.6	42.8	-0.5	1.23699	59.1	33.51	-0.206667	0.968497
									530.2	39.51	0.074519	1.1724	52.6	34.29	-0.00357143	1.01751		548.5	42.35	1.4	1.22399	57.6	33.82	-0.0416667	0.977457
													49.8	34.3	-0.0103448	1.0178		548.8	42.77	0.0779337	1.23613	55.2	33.92	0.0115385	0.980347
													46.9	34.33	0.0423077	1.01869						52.6	33.89	-0.00357143	0.97948
													44.3	34.22	0	1.01543						49.8	33.9	-0.0115385	0.979769
													41.7	34.22	-0.0952381	1.01543						47.2	33.93	0.0423077	0.980636
													39.6	34.42	0.869192	1.02136						44.6	33.82	-0.0416667	0.977457
																						42.2	33.92	-0.1	0.980347
																						40.2	34.12	0.047619	0.986127
																						38.1	34.02	0.892913	0.983237

## Sheet: T. Steps Irreversible
560 run heating				560 run cooling					580 run heating				580 run cooling
TEMP	CSUS	1st der	knorm						TEMP	CSUS	1st der	knorm
23.9	28.6	-1	1	571.2	39.1	0.0222222	1.36713		28.5	32.36	-1.5	1.13147	589.1	0.16	0.133333	0.00559441
24.1	28.4	-0.25	0.993007	570.3	39.08	-0.6	1.36643		28.3	32.66	-0.13	1.14196	588.5	0.08	-0.358333	0.0027972
25.7	28	0.0230769	0.979021	569.1	39.8	0.223077	1.39161		29.3	32.53	-0.361905	1.13741	587.3	0.51	-1	0.0178322
28.3	28.06	-0.0575758	0.981119	567.8	39.51	0.213333	1.38147		31.4	31.77	0.228	1.11084	585.7	2.11	-0.944444	0.0737762
31.6	27.87	0.232353	0.974476	566.3	39.19	-1.11333	1.37028		33.9	32.34	0.0172414	1.13077	583.9	3.81	-2.23684	0.133217
35	28.66	-0.1	1.0021	564.8	40.86	0.284211	1.42867		36.8	32.39	-0.117857	1.13252	582	8.06	-3.30476	0.281818
38.3	28.33	0.103125	0.990559	562.9	40.32	0.109524	1.40979		39.6	32.06	0.062069	1.12098	579.9	15	-2.576	0.524476
41.5	28.66	-0.212903	1.0021	560.8	40.09	-0.0107143	1.40175		42.5	32.24	0.0387097	1.12727	577.4	21.44	-3.93571	0.74965
44.6	28	0.180645	0.979021	558	40.12	0.356	1.4028		45.6	32.36	0.124138	1.13147	574.6	32.46	-3.075	1.13497
47.7	28.56	0.0928571	0.998601	555.5	39.23	-0.218519	1.37168		48.5	32.72	-0.0714286	1.14406	571.8	41.07	-0.514706	1.43601
50.5	28.82	-0.0241379	1.00769	552.8	39.82	0.0285714	1.39231		51.3	32.52	-0.0230769	1.13706	568.4	42.82	-0.206667	1.4972
53.4	28.75	-0.0692308	1.00524	550	39.74	0.322222	1.38951		53.9	32.46	0.0423077	1.13497	565.4	43.44	0.0558824	1.51888
56	28.57	-0.026087	0.998951	547.3	38.87	-0.414286	1.35909		56.5	32.57	-0.0115385	1.13881	562	43.25	0.0580645	1.51224
58.3	28.51	-0.166667	0.996853	544.5	40.03	0.037037	1.39965		59.1	32.54	0.1875	1.13776	558.9	43.07	-0.0592593	1.50594
60.7	28.11	0.295652	0.982867	541.8	39.93	0.189286	1.39615		61.5	32.99	-0.245	1.1535	556.2	43.23	0.075	1.51154
63	28.79	0.05	1.00664	539	39.4	0.0266667	1.37762		63.5	32.5	0.0833333	1.13636	553.4	43.02	0.271429	1.5042
65.4	28.91	-0.0391304	1.01084	536	39.32	0.366667	1.37483		65.9	32.7	-0.208696	1.14336	550.6	42.26	0.269697	1.47762
67.7	28.82	-0.141667	1.00769	533.3	38.33	-0.0709677	1.34021		68.2	32.22	0.104167	1.12657	547.3	41.37	-0.235484	1.4465
70.1	28.48	0.121739	0.995804	530.2	38.55	0.183333	1.3479		70.6	32.47	0.233333	1.13531	544.2	42.1	0.333333	1.47203
72.4	28.76	0.27619	1.00559	527.2	38	-0.169697	1.32867		72.7	32.96	-0.0571429	1.15245	540.9	41	-0.291176	1.43357
74.5	29.34	-0.404167	1.02587	523.9	38.56	0.23871	1.34825		74.8	32.84	-0.204348	1.14825	537.5	41.99	-0.122222	1.46818
76.9	28.37	0.133333	0.991958	520.8	37.82	-0.186667	1.32238		77.1	32.37	0.158333	1.13182	533.9	42.43	0.491176	1.48357
79	28.65	0.113043	1.00175	517.8	38.38	-0.304167	1.34196		79.5	32.75	-0.0238095	1.1451	530.5	40.76	-0.25	1.42517
81.3	28.91	-0.220833	1.01084	515.4	39.11	0.292593	1.36748		81.6	32.7	-0.1375	1.14336	527.5	41.51	0.0925926	1.4514
83.7	28.38	0.114286	0.992308	512.7	38.32	-0.15	1.33986		84	32.37	0.128571	1.13182	524.8	41.26	0.0352941	1.44266
85.8	28.62	0.145833	1.0007	509.9	38.74	0.0545455	1.35455		86.1	32.64	0.0565217	1.14126	521.4	41.14	0.153333	1.43846
88.2	28.97	0.0190476	1.01294	506.6	38.56	0.163636	1.34825		88.4	32.77	-0.115385	1.1458	518.4	40.68	-0.276667	1.42238
90.3	29.01	-0.0869565	1.01434	503.3	38.02	-0.0848485	1.32937		91	32.47	-0.0166667	1.13531	515.4	41.51	0.206061	1.4514
92.6	28.81	0.22381	1.00734	500	38.3	0.2	1.33916		93.4	32.43	0.0923077	1.13392	512.1	40.83	-0.167568	1.42762
94.7	29.28	-0.274074	1.02378	496.7	37.64	-0.0777778	1.31608		96	32.67	-0.037037	1.14231	508.4	41.45	0.10303	1.4493
97.4	28.54	0.147826	0.997902	493.1	37.92	0.236364	1.32587		98.7	32.57	0.3	1.13881	505.1	41.11	0.306061	1.43741
99.7	28.88	-0.133333	1.00979	489.8	37.14	-0.00909091	1.2986		101.3	33.35	-0.308333	1.16608	501.8	40.1	-0.0424242	1.4021
102.1	28.56	0.195833	0.998601	486.5	37.17	-0.0121212	1.29965		103.7	32.61	0.111538	1.14021	498.5	40.24	0.0361111	1.40699
104.5	29.03	0.192308	1.01503	483.2	37.21	-0.04375	1.30105		106.3	32.9	0.214815	1.15035	494.9	40.11	0.0121212	1.40245
107.1	29.53	-0.133333	1.03252	480	37.35	0.354545	1.30594		109	33.48	-0.176923	1.17063	491.6	40.07	0.158333	1.40105
109.5	29.21	0.0833333	1.02133	476.7	36.18	-0.206061	1.26503		111.6	33.02	0.0592593	1.15455	488	39.5	0	1.38112
111.9	29.41	-0.179167	1.02832	473.4	36.86	0.191667	1.28881		114.3	33.18	-0.115385	1.16014	484.4	39.5	-0.00909091	1.38112
114.3	28.98	-0.0384615	1.01329	469.8	36.17	-0.24375	1.26469		116.9	32.88	0.341667	1.14965	481.1	39.53	0.08125	1.38217
116.9	28.88	0.175	1.00979	466.6	36.95	0.0233333	1.29196		119.3	33.7	-0.303704	1.17832	477.9	39.27	-0.025	1.37308
119.3	29.3	-0.00740741	1.02448	463.6	36.88	0.30303	1.28951		122	32.88	-0.00833333	1.14965	474.3	39.36	-0.148485	1.37622
122	29.28	-0.0916667	1.02378	460.3	35.88	-0.306897	1.25455		124.4	32.86	0.173077	1.14895	471	39.85	0.263636	1.39336
124.4	29.06	-0.0608696	1.01608	457.4	36.77	-0.0133333	1.28566		127	33.31	-0.1875	1.16469	467.7	38.98	-0.3375	1.36294
126.7	28.92	0.125926	1.01119	454.4	36.81	0.166667	1.28706		129.4	32.86	-0.0481481	1.14895	464.5	40.06	0.178788	1.4007
129.4	29.26	-0.0166667	1.02308	451.4	36.31	-0.0103448	1.26958		132.1	32.73	0.280769	1.14441	461.2	39.47	0.0285714	1.38007
131.8	29.22	-0.0592593	1.02168	448.5	36.34	-0.0133333	1.27063		134.7	33.46	-0.214815	1.16993	457.7	39.37	0.0181818	1.37657
134.5	29.06	-0.025	1.01608	445.5	36.38	0.131034	1.27203		137.4	32.88	0.037037	1.14965	454.4	39.31	-0.0939394	1.37448
136.9	29	-0.0833333	1.01399	442.6	36	-0.20625	1.25874		140.1	32.98	0.0666667	1.15315	451.1	39.62	0.02	1.38531
139.3	28.8	0.246154	1.00699	439.4	36.66	0.263636	1.28182		142.5	33.14	-0.173077	1.15874	447.6	39.55	0.0689655	1.38287
141.9	29.44	-0.05	1.02937	436.1	35.79	-0.159375	1.2514		145.1	32.69	0.237037	1.14301	444.7	39.35	-0.0333333	1.37587
144.3	29.32	0.0208333	1.02517	432.9	36.3	0.084375	1.26923		147.8	33.33	-0.0185185	1.16538	441.4	39.46	0.206897	1.37972
146.7	29.37	-0.0666667	1.02692	429.7	36.03	0.106667	1.25979		150.5	33.28	-0.0137931	1.16364	438.5	38.86	0.0878788	1.35874
149.4	29.19	0.15	1.02063	426.7	35.71	0.128125	1.2486		153.4	33.24	0.062963	1.16224	435.2	38.57	-0.0314286	1.3486
152.4	29.64	-0.00740741	1.03636	423.5	35.3	-0.444828	1.23427		156.1	33.41	0.062963	1.16818	431.7	38.68	-0.103125	1.35245
155.1	29.62	0.0923077	1.03566	420.6	36.59	0.0655172	1.27937		158.8	33.58	-0.237037	1.17413	428.5	39.01	-0.003125	1.36399
157.7	29.86	-0.181481	1.04406	417.7	36.4	0.142424	1.27273		161.5	32.94	0.0851852	1.15175	425.3	39.02	0.348485	1.36434
160.4	29.37	-0.179167	1.02692	414.4	35.93	0.237931	1.25629		164.2	33.17	-0.037037	1.15979	422	37.87	-0.2875	1.32413
162.8	28.94	0.118519	1.01189	411.5	35.24	-0.025	1.23217		166.9	33.07	-0.0444444	1.15629	418.8	38.79	0.0142857	1.35629
165.5	29.26	0.0222222	1.02308	408.3	35.32	-0.268966	1.23497		169.6	32.95	-0.110345	1.1521	415.3	38.74	0.384375	1.35455
168.2	29.32	0.140741	1.02517	405.4	36.1	-0.0206897	1.26224		172.5	32.63	0.137037	1.14091	412.1	37.51	-0.322857	1.31154
170.9	29.7	0	1.03846	402.5	36.16	0.234483	1.26434		175.2	33	0.0592593	1.15385	408.6	38.64	0.0628571	1.35105
173.6	29.7	-0.111111	1.03846	399.6	35.48	-0.313793	1.24056		177.9	33.16	0.166667	1.15944	405.1	38.42	0.046875	1.34336
176.3	29.4	0.293333	1.02797	396.7	36.39	0.206897	1.27238		180.6	33.61	-0.224	1.17517	401.9	38.27	-0.145714	1.33811
179.3	30.28	-0.177778	1.05874	393.8	35.79	0.015625	1.2514		183.1	33.05	0.203704	1.15559	398.4	38.78	-0.108824	1.35594
182	29.8	0.0777778	1.04196	390.6	35.74	0.178125	1.24965		185.8	33.6	-0.185185	1.17483	395	39.15	0.26	1.36888
184.7	30.01	0	1.0493	387.4	35.17	-0.323529	1.22972		188.5	33.1	0.233333	1.15734	391.5	38.24	0.0342857	1.33706
187.4	30.01	0.0444444	1.0493	384	36.27	0.317241	1.26818		191.2	33.73	-0.159259	1.17937	388	38.12	-0.071875	1.33287
190.1	30.13	0.13	1.0535	381.1	35.35	-0.00769231	1.23601		193.9	33.3	0.111111	1.16434	384.8	38.35	0	1.34091
193.1	30.52	-0.381481	1.06713	378.5	35.37	0.146875	1.23671		196.6	33.6	0.185185	1.17483	381.7	38.35	0.15	1.34091
195.8	29.49	0.47	1.03112	375.3	34.9	0.08125	1.22028		199.3	34.1	-0.303571	1.19231	378.5	37.87	-0.353125	1.32413
198.8	30.9	-0.422222	1.08042	372.1	34.64	-0.175	1.21119		202.1	33.25	0.2	1.16259	375.3	39	0.396552	1.36364
201.5	29.76	0.216667	1.04056	369.3	35.13	0.13125	1.22832		204.8	33.79	-0.383333	1.18147	372.4	37.85	0.103226	1.32343
204.5	30.41	-0.237037	1.06329	366.1	34.71	-0.145161	1.21364		207.8	32.64	0.159259	1.14126	369.3	37.53	-0.025	1.31224
207.2	29.77	0.103571	1.04091	363	35.16	0.225	1.22937		210.5	33.07	0.0928571	1.15629	366.1	37.61	-0.194118	1.31503
210	30.06	0.02	1.05105	359.8	34.44	-0.389655	1.2042		213.3	33.33	-0.103704	1.16538	362.7	38.27	0.165625	1.33811
213	30.12	0.0111111	1.05315	356.9	35.57	0.132258	1.24371		216	33.05	0.262963	1.15559	359.5	37.74	0.132143	1.31958
215.7	30.15	0.296296	1.0542	353.8	35.16	0.13125	1.22937		218.7	33.76	0.004	1.18042	356.7	37.37	0.12	1.30664
218.4	30.95	-0.278571	1.08217	350.6	34.74	-0.0258065	1.21469		221.2	33.77	0.0814815	1.18077	353.2	36.95	0.00588235	1.29196
221.2	30.17	0.00666667	1.0549	347.5	34.82	0.0821429	1.21748		223.9	33.99	-0.18	1.18846	349.8	36.93	-0.164516	1.29126
224.2	30.19	-0.0592593	1.05559	344.7	34.59	-0.0914286	1.20944		226.4	33.54	0.0296296	1.17273	346.7	37.44	0.114286	1.30909
226.9	30.03	0.235484	1.05	341.2	34.91	0.0558824	1.22063		229.1	33.62	-0.364516	1.17552	343.2	37.04	-0.205882	1.2951
230	30.76	-0.17037	1.07552	337.8	34.72	-0.188235	1.21399		232.2	32.49	0.5	1.13601	339.8	37.74	0.158824	1.31958
232.7	30.3	0	1.05944	334.4	35.36	0.0594595	1.23636		235.2	33.99	-0.333333	1.18846	336.4	37.2	0.0806452	1.3007
235.5	30.3	0.0333333	1.05944	330.7	35.14	0.308824	1.22867		238.2	32.99	0.146667	1.1535	333.3	36.95	-0.293548	1.29196
238.5	30.4	0.159259	1.06294	327.3	34.09	-0.170588	1.19196		241.2	33.43	0.277419	1.16888	330.2	37.86	0.36875	1.32378
241.2	30.83	-0.335484	1.07797	323.9	34.67	0.179412	1.21224		244.3	34.29	-0.0766667	1.19895	327	36.68	0.00294118	1.28252
244.3	29.79	0.0566667	1.04161	320.5	34.06	-0.247059	1.19091		247.3	34.06	-0.106667	1.19091	323.6	36.67	-0.254839	1.28217
247.3	29.96	0.207143	1.04755	317.1	34.9	0.196774	1.22028		250.3	33.74	0.135484	1.17972	320.5	37.46	-0.141935	1.30979
250.1	30.54	0.177778	1.06783	314	34.29	-0.0451613	1.19895		253.4	34.16	-0.0533333	1.19441	317.4	37.9	0.414706	1.32517
252.8	31.02	-0.221429	1.08462	310.9	34.43	0.0529412	1.20385		256.4	34	-0.0892857	1.18881	314	36.49	-0.0129032	1.27587
255.6	30.4	0.0516129	1.06294	307.5	34.25	0.0636364	1.19755		259.2	33.75	0.190323	1.18007	310.9	36.53	-0.1	1.27727
258.7	30.56	0.0037037	1.06853	304.2	34.04	-0.0285714	1.19021		262.3	34.34	-0.106667	1.2007	307.8	36.84	-0.0387097	1.28811
261.4	30.57	0.0645161	1.06888	301.4	34.12	0.083871	1.19301		265.3	34.02	-0.10303	1.18951	304.7	36.96	0.0727273	1.29231
264.5	30.77	-0.113333	1.07587	298.3	33.86	-0.119355	1.18392		268.6	33.68	0.0548387	1.17762	301.4	36.72	0.0193548	1.28392
267.5	30.43	0.321429	1.06399	295.2	34.23	0.120588	1.19685		271.7	33.85	-0.106452	1.18357	298.3	36.66	-0.0548387	1.28182
270.3	31.33	-0.0193548	1.09545	291.8	33.82	-0.129032	1.18252		274.8	33.52	-0.00333333	1.17203	295.2	36.83	0.325806	1.28776
273.4	31.27	-0.22	1.09336	288.7	34.22	0.148485	1.1965		277.8	33.51	0.0774194	1.17168	292.1	35.82	-0.117647	1.25245
276.4	30.61	0.109677	1.07028	285.4	33.73	-0.0774194	1.17937		280.9	33.75	-0.0178571	1.18007	288.7	36.22	-0.236667	1.26643
279.5	30.95	-0.154839	1.08217	282.3	33.97	-0.0774194	1.18776		283.7	33.7	-0.0419355	1.17832	285.7	36.93	0.532258	1.29126
282.6	30.47	0.272727	1.06538	279.2	34.21	0.0166667	1.19615		286.8	33.57	-0.135484	1.17378	282.6	35.28	-0.0676471	1.23357
285.9	31.37	-0.109677	1.09685	276.2	34.16	0.0214286	1.19441		289.9	33.15	0.166667	1.15909	279.2	35.51	-0.436364	1.24161
289	31.03	0.0214286	1.08497	273.4	34.1	0.0548387	1.19231		293.2	33.7	-0.0823529	1.17832	275.9	36.95	0.25	1.29196
291.8	31.09	0.0464286	1.08706	270.3	33.93	-0.156667	1.18636		296.6	33.42	0.127273	1.16853	272.5	36.1	0.29	1.26224
294.6	31.22	0.1	1.09161	267.3	34.4	0.016129	1.2028		299.9	33.84	-0.05	1.18322	269.5	35.23	-0.351613	1.23182
297.7	31.53	-0.141176	1.10245	264.2	34.35	-0.0571429	1.20105		303.3	33.67	-0.332258	1.17727	266.4	36.32	0.15	1.26993
301.1	31.05	0.2	1.08566	261.4	34.51	0.245455	1.20664		306.4	32.64	0.305882	1.14126	263.4	35.87	-0.105882	1.2542
304.4	31.71	-0.3	1.10874	258.1	33.7	-0.113333	1.17832		309.8	33.68	0.155882	1.17762	260	36.23	0.176667	1.26678
307.8	30.69	0.454839	1.07308	255.1	34.04	0.0322581	1.19021		313.2	34.21	-0.248387	1.19615	257	35.7	-0.196774	1.24825
310.9	32.1	-0.516129	1.12238	252	33.94	0.143333	1.18671		316.3	33.44	-0.141176	1.16923	253.9	36.31	0.233333	1.26958
314	30.5	0.141176	1.06643	249	33.51	-0.187097	1.17168		319.7	32.96	0.297059	1.15245	250.9	35.61	-0.103571	1.2451
317.4	30.98	-0.0794118	1.08322	245.9	34.09	0.0222222	1.19196		323.1	33.97	0.0794118	1.18776	248.1	35.9	0.114815	1.25524
320.8	30.71	0.0967742	1.07378	243.2	34.03	-0.0678571	1.18986		326.5	34.24	-0.332353	1.1972	245.4	35.59	-0.176	1.24441
323.9	31.01	0.232258	1.08427	240.4	34.22	-0.01	1.1965		329.9	33.11	0.33871	1.15769	242.9	36.03	-0.0366667	1.25979
327	31.73	-0.0567568	1.10944	237.4	34.25	0.435714	1.19755		333	34.16	-0.179412	1.19441	239.9	36.14	0.242857	1.26364
330.7	31.52	-0.258065	1.1021	234.6	33.03	-0.37037	1.1549		336.4	33.55	0.179412	1.17308	237.1	35.46	-0.174074	1.23986
333.8	30.72	0.324138	1.07413	231.9	34.03	0.303571	1.18986		339.8	34.16	-0.16129	1.19441	234.4	35.93	0.075	1.25629
336.7	31.66	-0.258065	1.10699	229.1	33.18	-0.163333	1.16014		342.9	33.66	-0.0125	1.17692	231.6	35.72	0.274074	1.24895
339.8	30.86	0.0275862	1.07902	226.1	33.67	-0.133333	1.17727		346.1	33.62	-0.141935	1.17552	228.9	34.98	-0.125806	1.22308
342.7	30.94	0.0357143	1.08182	223.4	34.03	0.2	1.18986		349.2	33.18	0.188235	1.16014	225.8	35.37	-0.17037	1.23671
345.5	31.04	-0.046875	1.08531	220.6	33.47	-0.0481481	1.17028		352.6	33.82	0.125	1.18252	223.1	35.83	0.133333	1.2528
348.7	30.89	0.13871	1.08007	217.9	33.6	-0.0233333	1.17483		355.8	34.22	-0.222581	1.1965	220.4	35.47	0.286667	1.24021
351.8	31.32	-0.126471	1.0951	214.9	33.67	0.0962963	1.17727		358.9	33.53	0.259375	1.17238	217.4	34.61	-0.132143	1.21014
355.2	30.89	0.140625	1.08007	212.2	33.41	-0.0678571	1.16818		362.1	34.36	-0.353125	1.2014	214.6	34.98	-0.00666667	1.22308
358.4	31.34	-0.0357143	1.0958	209.4	33.6	-0.111111	1.17483		365.3	33.23	0.288235	1.16189	211.6	35	-0.0566667	1.22378
361.2	31.24	0.0228571	1.09231	206.7	33.9	0.196667	1.18531		368.7	34.21	-0.0432432	1.19615	208.6	35.17	0.107407	1.22972
364.7	31.32	0.280645	1.0951	203.7	33.31	-0.151852	1.16469		372.4	34.05	0.284375	1.19056	205.9	34.88	-0.153333	1.21958
367.8	32.19	-0.12	1.12552	201	33.72	0.211111	1.17902		375.6	34.96	-0.0714286	1.22238	202.9	35.34	0.114815	1.23566
371.3	31.77	0.227586	1.11084	198.3	33.15	-0.275	1.15909		379.1	34.71	-0.126471	1.21364	200.2	35.03	0.0535714	1.22483
374.2	32.43	0.0419355	1.13392	195.5	33.92	0.179167	1.18601		382.5	34.28	0.115385	1.1986	197.4	34.88	0.0518519	1.21958
377.3	32.56	-0.2	1.13846	193.1	33.49	-0.01	1.17098		385.1	34.58	-0.0103448	1.20909	194.7	34.74	-0.4	1.21469
380.8	31.86	-0.0228571	1.11399	190.1	33.52	-0.0814815	1.17203		388	34.55	-0.144828	1.20804	192	35.82	0.29	1.25245
384.3	31.78	0.138235	1.11119	187.4	33.74	0.0703704	1.17972		390.9	34.13	0.328571	1.19336	189	34.95	0.0481481	1.22203
387.7	32.25	-0.148571	1.12762	184.7	33.55	0.262963	1.17308		394.4	35.28	-0.178125	1.23357	186.3	34.82	-0.0925926	1.21748
391.2	31.73	0.258621	1.10944	182	32.84	-0.3125	1.14825		397.6	34.71	-0.194286	1.21364	183.6	35.07	0.0185185	1.22622
394.1	32.48	0.151429	1.13566	179.6	33.59	-0.11	1.17448		401.1	34.03	0.265625	1.18986	180.9	35.02	0.0185185	1.22448
397.6	33.01	-0.271875	1.1542	176.6	33.92	0.45	1.18601		404.3	34.88	-0.08125	1.21958	178.2	34.97	0.0555556	1.22273
400.8	32.14	0.0517241	1.12378	174.2	32.84	-0.0166667	1.14825		407.5	34.62	-0.0617647	1.21049	175.5	34.82	0.114815	1.21748
403.7	32.29	-0.286207	1.12902	171.2	32.89	-0.144444	1.15		410.9	34.41	0.117143	1.20315	172.8	34.51	0.0777778	1.20664
406.6	31.46	0.217143	1.1	168.5	33.28	0.288889	1.16364		414.4	34.82	-0.106061	1.21748	170.1	34.3	-0.251852	1.1993
410.1	32.22	0.03125	1.12657	165.8	32.5	-0.125926	1.13636		417.7	34.47	0.1875	1.20524	167.4	34.98	0.125926	1.22308
413.3	32.32	-0.0257143	1.13007	163.1	32.84	-0.170833	1.14825		420.9	35.07	-0.114286	1.22622	164.7	34.64	0.162963	1.21119
416.8	32.23	-0.146875	1.12692	160.7	33.25	-0.0037037	1.16259		424.4	34.67	0.125714	1.21224	162	34.2	-0.037037	1.1958
420	31.76	0.242857	1.11049	158	33.26	0.241667	1.16294		427.9	35.11	0.237143	1.22762	159.3	34.3	-0.154167	1.1993
423.5	32.61	0.248571	1.14021	155.6	32.68	-0.0833333	1.14266		431.4	35.94	-0.342857	1.25664	156.9	34.67	-0.00833333	1.21224
427	33.48	-0.23125	1.17063	153.2	32.88	-0.2	1.14965		434.9	34.74	-0.0916667	1.21469	154.5	34.69	0.17037	1.21294
430.2	32.74	-0.0272727	1.14476	150.5	33.42	0.0518519	1.16853		438.5	34.41	0.228125	1.20315	151.8	34.23	-0.103846	1.19685
433.5	32.65	0.1625	1.14161	147.8	33.28	-0.244444	1.16364		441.7	35.14	-0.131429	1.22867	149.2	34.5	-0.0592593	1.20629
436.7	33.17	-0.4625	1.15979	145.1	33.94	0.233333	1.18671		445.2	34.68	0.166667	1.21259	146.5	34.66	-0.0125	1.21189
439.9	31.69	0.7	1.10804	142.7	33.38	0.192308	1.16713		448.8	35.28	-0.0868421	1.23357	144.1	34.69	0.0666667	1.21294
443.2	34	-0.440625	1.18881	140.1	32.88	-0.188889	1.14965		452.6	34.95	0.138462	1.22203	141.4	34.51	0.0708333	1.20664
446.4	32.59	-0.0454545	1.13951	137.4	33.39	0.155556	1.16748		456.5	35.49	0.0736842	1.24091	139	34.34	-0.104167	1.2007
449.7	32.44	-0.111429	1.13427	134.7	32.97	0.0666667	1.1528		460.3	35.77	0.0722222	1.2507	136.6	34.59	-0.0962963	1.20944
453.2	32.05	0.151282	1.12063	132.3	32.81	-0.0448276	1.1472		463.9	36.03	-0.0457143	1.25979	133.9	34.85	0.388462	1.21853
457.1	32.64	0.294286	1.14126	129.4	32.94	-0.0482759	1.15175		467.4	35.87	-0.102778	1.2542	131.3	33.84	-0.106667	1.18322
460.6	33.67	-0.402778	1.17727	126.5	33.08	0.125926	1.15664		471	35.5	0.2	1.24126	128.3	34.16	0.0615385	1.19441
464.2	32.22	0.392105	1.12657	123.8	32.74	-0.161538	1.14476		474.9	36.28	-0.144444	1.26853	125.7	34	-0.155556	1.18881
468	33.71	0.0487179	1.17867	121.2	33.16	0.0555556	1.15944		478.5	35.76	-0.0894737	1.25035	123	34.42	0.173077	1.2035
471.9	33.9	-0.0487179	1.18531	118.5	33.01	0.0807692	1.1542		482.3	35.42	0.207692	1.23846	120.4	33.97	-0.0925926	1.18776
475.8	33.71	0.08	1.17867	115.9	32.8	0.137037	1.14685		486.2	36.23	0.227778	1.26678	117.7	34.22	0.00833333	1.1965
478.8	33.95	-0.1375	1.18706	113.2	32.43	-0.161538	1.13392		489.8	37.05	-0.241667	1.29545	115.3	34.2	-0.0958333	1.1958
482	33.51	0.0944444	1.17168	110.6	32.85	-0.1	1.1486		493.4	36.18	-0.0333333	1.26503	112.9	34.43	0.253846	1.20385
485.6	33.85	-0.112121	1.18357	108.2	33.09	0.0111111	1.15699		497	36.06	0.382051	1.26084	110.3	33.77	-0.295238	1.18077
488.9	33.48	0.251515	1.17063	105.5	33.06	0.295238	1.15594		500.9	37.55	-0.241667	1.31294	108.2	34.39	0.0916667	1.20245
492.2	34.31	-0.0692308	1.19965	103.4	32.44	-0.0130435	1.13427		504.5	36.68	0.364103	1.28252	105.8	34.17	0.220833	1.19476
496.1	34.04	0.545455	1.19021	101.1	32.47	-0.15	1.13531		508.4	38.1	-0.08	1.33217	103.4	33.64	-0.157143	1.17622
499.4	35.84	-0.357576	1.25315	98.9	32.8	0.269565	1.14685		512.4	37.78	-0.0307692	1.32098	101.3	33.97	-0.0190476	1.18776
502.7	34.66	0.151515	1.21189	96.6	32.18	-0.280952	1.12517		516.3	37.66	0.115385	1.31678	99.2	34.01	0.052381	1.18916
506	35.16	0.0272727	1.22937	94.5	32.77	-0.025	1.1458		520.2	38.11	0.0783784	1.33252	97.1	33.9	0.0190476	1.18531
509.3	35.25	0.276471	1.23252	92.1	32.83	0.0666667	1.1479		523.9	38.4	-0.225	1.34266	95	33.86	-0.0857143	1.18392
512.7	36.19	-0.190909	1.26538	90	32.69	-0.185714	1.14301		527.5	37.59	0.271795	1.31434	92.9	34.04	-0.114286	1.19021
516	35.56	-0.248485	1.24336	87.9	33.08	0.0380952	1.15664		531.4	38.65	0.154054	1.3514	90.8	34.28	0.219048	1.1986
519.3	34.74	0.278788	1.21469	85.8	33	0.27619	1.15385		535.1	39.22	0.0410256	1.37133	88.7	33.82	-0.0285714	1.18252
522.6	35.66	-0.0147059	1.24685	83.7	32.42	-0.4	1.13357		539	39.38	0.105405	1.37692	86.6	33.88	0.12381	1.18462
526	35.61	-0.142424	1.2451	81.9	33.14	0.171429	1.15874		542.7	39.77	0.32	1.39056	84.5	33.62	-0.1	1.17552
529.3	35.14	0.0891892	1.22867	79.8	32.78	0.0571429	1.14615		546.7	41.05	-0.1	1.43531	82.4	33.83	0.0666667	1.18287
533	35.47	0.0878788	1.24021	77.7	32.66	-0.242105	1.14196		550.6	40.66	0.0837838	1.42168	80.3	33.69	-0.180952	1.17797
536.3	35.76	0.194595	1.25035	75.8	33.12	0.05	1.15804		554.3	40.97	-0.181081	1.43252	78.2	34.07	0.0944444	1.19126
540	36.48	0.0888889	1.27552	74	33.03	0.0888889	1.1549		558	40.3	0.181081	1.40909	76.4	33.9	-0.173684	1.18531
543.6	36.8	0.0205882	1.28671	72.2	32.87	0.110526	1.1493		561.7	40.97	0.185294	1.43252	74.5	34.23	0.12381	1.19685
547	36.87	0.108333	1.28916	70.3	32.66	0.0388889	1.14196		565.1	41.6	-0.378788	1.45455	72.4	33.97	-0.105556	1.18776
550.6	37.26	0.326471	1.3028	68.5	32.59	-0.157143	1.13951		568.4	40.35	-0.776471	1.41084	70.6	34.16	0.0944444	1.19441
554	38.37	-0.1675	1.34161	66.4	32.92	0.0777778	1.15105		571.8	37.71	-3.00588	1.31853	68.8	33.99	0.0714286	1.18846
558	37.7	0.288235	1.31818	64.6	32.78	-0.0166667	1.14615		575.2	27.49	-3.4973	0.961189	66.7	33.84	-0.133333	1.18322
561.4	38.68	0.0411765	1.35245	62.8	32.81	-0.03125	1.1472		578.9	14.55	-2.60588	0.508741	64.9	34.08	0.142105	1.19161
564.8	38.82	-0.02	1.35734	61.2	32.86	-0.0833333	1.14895		582.3	5.69	-1.20588	0.198951	63	33.81	-0.36	1.18217
567.8	38.76	0.327273	1.35524	59.4	33.01	0.05	1.1542		585.7	1.59	0.131579	0.0555944	61.5	34.35	0.275	1.20105
570	39.48	-0.977778	1.38042	57.6	32.92	0.0416667	1.15105		587.6	1.84	-1.56667	0.0643357	59.9	33.91	-0.0611111	1.18566
570.9	38.6	2.66667	1.34965	55.2	32.82	0.0115385	1.14755		588.8	-0.04	0.666667	-0.0013986	58.1	34.02	-0.0416667	1.18951
571.2	39.4	#DIV/0!	1.37762	52.6	32.79	-0.075	1.1465						55.7	34.12	0.0821429	1.19301
				49.8	33	-0.0448276	1.15385						52.9	33.89	0.0346154	1.18497
				46.9	33.13	0.0423077	1.15839						50.3	33.8	-0.0448276	1.18182
				44.3	33.02	0.0384615	1.15455						47.4	33.93	0.0423077	1.18636
				41.7	32.92	0	1.15105						44.8	33.82	-0.0434783	1.18252
				39.6	32.92	0.831313	1.15105						42.5	33.92	0	1.18601
													40.4	33.92	-0.111111	1.18601
													38.6	34.12	0.883938	1.19301
